# Supplementary material for: Cross-sectional study of association between socioeconomic indicators and chronic kidney disease in rural–urban Ghana: the RODAM study
Source: PubMed Central journal article supplement (PMC6537994; doi:10.1136/bmjopen-2018-022610), 2019-05-24
Supplement: bmjopen-2018-022610.draft_revisions.pdf [file bmjopen-2018-022610.draft_revisions.pdf]

# BMJ Open

BMJ Open is committed to open peer review. As part of this commitment we make the peer review history of every article we publish publicly available.

When an article is published we post the peer reviewers' comments and the authors' responses online. We also post the versions of the paper that were used during peer review. These are the versions that the peer review comments apply to.

The versions of the paper that follow are the versions that were submitted during the peer review process. They are not the versions of record or the final published versions. They should not be cited or distributed as the published version of this manuscript.

BMJ Open is an open access journal and the full, final, typeset and author-corrected version of record of the manuscript is available on our site with no access controls, subscription charges or pay-per-view fees (<http://bmjopen.bmj.com>).

If you have any questions on BMJ Open's open peer review process please email [info.bmjopen@bmj.com](mailto:info.bmjopen@bmj.com)

# BMJ Open

## ASSOCIATION BETWEEN SOCIOECONOMIC INDICATORS AND CHRONIC KIDNEY DISEASE IN RURAL-URBAN GHANA- THE RODAM STUDY

|                               |                                                                                                                                                                                                                                                                                                                                                                                                                                                                                                                                                                                                                                                                                                                                                                                                                                                                                                                                                                                                                                                                                                                                                                                                                                                                                                                                                                                                                                                                                                                                                                                                                       |
|-------------------------------|-----------------------------------------------------------------------------------------------------------------------------------------------------------------------------------------------------------------------------------------------------------------------------------------------------------------------------------------------------------------------------------------------------------------------------------------------------------------------------------------------------------------------------------------------------------------------------------------------------------------------------------------------------------------------------------------------------------------------------------------------------------------------------------------------------------------------------------------------------------------------------------------------------------------------------------------------------------------------------------------------------------------------------------------------------------------------------------------------------------------------------------------------------------------------------------------------------------------------------------------------------------------------------------------------------------------------------------------------------------------------------------------------------------------------------------------------------------------------------------------------------------------------------------------------------------------------------------------------------------------------|
| Journal:                      | <i>BMJ Open</i>                                                                                                                                                                                                                                                                                                                                                                                                                                                                                                                                                                                                                                                                                                                                                                                                                                                                                                                                                                                                                                                                                                                                                                                                                                                                                                                                                                                                                                                                                                                                                                                                       |
| Manuscript ID                 | bmjopen-2018-022610                                                                                                                                                                                                                                                                                                                                                                                                                                                                                                                                                                                                                                                                                                                                                                                                                                                                                                                                                                                                                                                                                                                                                                                                                                                                                                                                                                                                                                                                                                                                                                                                   |
| Article Type:                 | Research                                                                                                                                                                                                                                                                                                                                                                                                                                                                                                                                                                                                                                                                                                                                                                                                                                                                                                                                                                                                                                                                                                                                                                                                                                                                                                                                                                                                                                                                                                                                                                                                              |
| Date Submitted by the Author: | 01-Mar-2018                                                                                                                                                                                                                                                                                                                                                                                                                                                                                                                                                                                                                                                                                                                                                                                                                                                                                                                                                                                                                                                                                                                                                                                                                                                                                                                                                                                                                                                                                                                                                                                                           |
| Complete List of Authors:     | <p>Adjei Nana, David ; University of Ghana, Department of Medical Laboratory Sciences; University of Amsterdam, Department of Public Health<br/> Stronks, Karien; Academic Medical Center , Department of Public Health<br/> Adu, Dwomoa; Korle-bu Teaching Hospital, Department of Medicine<br/> Beune, Erik; AMC<br/> Meeks, Karlijn; AMC, Public Health<br/> Smeeth, Liam; London School of Hygiene and Tropical Medicine,<br/> Addo, Juliet; London School of Hygiene and Tropical Medicine, Non<br/> Communicable Disease Epidemiology<br/> Owusu-Dabo, Ellis; Kwame Nkrumah University of Science and Technology,<br/> Kumasi Centre for Collaborative Research in Tropical Medicine<br/> Klipstein-Grobusch, Kerstin; 1 Julius Global Health, Julius Center for Health<br/> Sciences and Primary Care, University Medical Centre Utrecht, Utrecht, The<br/> Netherlands<br/> Mockenhaupt, Frank; Charité – University Medicine, Berlin, Institute of<br/> Tropical Medicine and International Health<br/> Danquah, Ina; German Institute of Human Nutrition, Molecular<br/> Epidemiology; Charite Universitätsmedizin Berlin, Institute for Social<br/> Medicine, Epidemiology and Health Economy<br/> Spranger, Joachim; Department of Endocrinology and Metabolism, 1.<br/> Charité-University Medicine Berlin, Berlin, Germany.<br/> Bahendeka, Silver; 1. MKPGMS - Uganda Martyrs University<br/> De-Graft Aikins, Ama; University of Ghana, Regional Institute for<br/> Population Studies<br/> Agyemang, Charles; Academic Medical centre, University of Amsterdam,<br/> Department of Public Health</p> |
| Keywords:                     | Chronic Kidney Disease, Socioeconomic status, Health inequalities, RODAM study, rural, urban                                                                                                                                                                                                                                                                                                                                                                                                                                                                                                                                                                                                                                                                                                                                                                                                                                                                                                                                                                                                                                                                                                                                                                                                                                                                                                                                                                                                                                                                                                                          |
|                               |                                                                                                                                                                                                                                                                                                                                                                                                                                                                                                                                                                                                                                                                                                                                                                                                                                                                                                                                                                                                                                                                                                                                                                                                                                                                                                                                                                                                                                                                                                                                                                                                                       |

SCHOLARONE™  
Manuscripts

## ASSOCIATION BETWEEN SOCIOECONOMIC INDICATORS AND CHRONIC KIDNEY DISEASE IN RURAL-URBAN GHANA-THE RODAM STUDY

David N. Adjei, MSc<sup>1,2</sup>; Karien Stronks, MSc, PhD<sup>1</sup>; Dwomoa Adu, MD<sup>3</sup>; Erik Beune, MSc, PhD<sup>1</sup>; Karlijn Meeks, MSc<sup>1</sup>; Liam Smeeth, MD, PhD<sup>4</sup>; Juliet, Addo, MD, PhD<sup>4</sup>; Ellis Owusu-Dabo, MSc, PhD<sup>5</sup>; Kerstin Klipstein-Grobusch, MSc, PhD<sup>6,7</sup>; Frank P. Mockenhaupt, MD, PhD<sup>8</sup>; Ina, Danquah, MSc, PhD<sup>9</sup>; Joachim, Spranger, MD, PhD<sup>10,11,12</sup>; Silver Bahendeka, MD, PhD<sup>13</sup>; Ama de-Graft, Aikins, MSc, PhD<sup>14</sup>; Charles Agyemang, MPH, PHD<sup>1</sup>

1. Department of Public Health, Academic Medical Center, University of Amsterdam, Amsterdam Public Health Research Institute, Amsterdam, The Netherlands.
2. Department of Medical Laboratory Sciences, School of Biomedical and Allied Health Sciences, College of Health Sciences, University of Ghana, Accra, Ghana.
3. Department of Medicine, School of Medicine and Dentistry, University of Ghana and Korle-Bu Teaching Hospital, Accra, Ghana.
4. Department of Non-communicable Disease Epidemiology, London School of Hygiene and Tropical Medicine, London, United Kingdom.
5. Kumasi Centre for collaborative Research, KNUST, Kumasi, Ghana
6. Julius Global Health, Julius Center for Health Sciences and Primary Care, University Medical Centre, Utrecht University, The Netherlands
7. Division of Epidemiology & Biostatistics, School of Public Health, Faculty of Healths, University of the Witwatersrand, Johannesburg, South Africa
8. Institute of Tropical Medicine and International Health, Charité – University Medicine Berlin, Augustenburger Platz 1, 13353 Berlin, Germany.
9. Department of Molecular Epidemiology, German Institute of Human Nutrition Potsdam-Rehbrücke, Nuthetal, Germany.
10. Department of Endocrinology and Metabolism, Charité-University Medicine Berlin, Berlin, Germany.
11. German Centre for Cardiovascular Research (DZHK), Berlin, Germany.
12. Center for Cardiovascular Research (CCR), Charité-University Medicine Berlin, Berlin, Germany.
13. MKPGMS - Uganda Martyrs University, Kampala, Uganda.
14. Regional Institute for Population Studies, University of Ghana, Legon, Ghana.

Address correspondence to David Nana Adjei, MSc, Department of Public Health, Academic Medical Centre, University of Amsterdam, Meibergdreef 9, 1105 AZ Amsterdam, the Netherlands, School Biomedical and Allied Health Sciences, Medical Laboratory Sciences, University of Ghana, E-mail: [dna@chs.edu.gh](mailto:dna@chs.edu.gh), [d.n.adjei@amc.uva.nl](mailto:d.n.adjei@amc.uva.nl), Tel: +233236717850

## Abstract

**Objectives** Studies from high income countries suggest higher prevalence of Chronic Kidney Disease (CKD) among individuals in low socio economic groups. However, some studies from low and middle-income countries (LMICs) show the reverse pattern among those in high socioeconomic groups. It is unknown which pattern applies to individuals living in rural and urban Ghana. We therefore assessed the association between Socio-Economic Status (SES) indicators and CKD in rural and urban Ghana and to what extent the higher SES of people in urban areas of Ghana could account for differences in CKD between rural and urban populations.

**Setting:** We used baseline data from multi-centre Research on Obesity and Diabetes among African Migrants (RODAM) study.

**Participants:** A sample of 2492 adults (Rural Ghana, 1043, Urban Ghana, 1,449 aged 25 to 70 years living in Ghana).

**Outcomes & Measurements** Three CKD outcomes were considered using the 2012 KDIGO (Kidney Disease: Improving Global Outcomes) severity of CKD classification: albuminuria (albumin-creatinine ratio  $\geq 3$  mg/mmol (category  $\geq$  A2)); reduced glomerular filtration rate (eGFR  $< 60$  mL/min/1.73 m<sup>2</sup> (category  $\geq$  G3)) and high to very high CKD risk based on the combination of these two.

**Results** All three SES indicators were not associated with CKD in both rural and urban Ghana after age and sex adjustment except for rural Ghana where high wealth index was significantly associated with higher odds of reduced eGFR (AOR, 2.38; 95% C.I. 1.03-5.47). The higher rate of CKD observed in urban Ghana was not explained by the higher SES of that population.

**Conclusion** SES indicators were not associated with prevalence of CKD except for wealth index and reduced eGFR in rural Ghana. Consequently, the higher SES did not account for the increased rate of CKD among urban dwellers suggesting the need to identify other factors that may be driving this.

**Index Words:** Chronic kidney disease; socioeconomic status; health inequalities; risk factor; ethnic minority groups; migrants; RODAM study, Ghana

### Strengths and limitation of the study

- The use of well-standardized study protocols across rural and urban Ghana eliminated intra protocol variability.
- Our study is also the first in Africa to use all three categories of CKD definition (albuminuria, reduced eGFR and CKD risk) by KDIGO 2012 in assessing association of SES with CKD in rural and urban setting, this provides a more detailed information on CKD outcomes.
- The limitation of intra laboratory variability in earlier studies was eliminated using the same standard operating procedures in the same laboratory for running all samples for both rural and urban Ghana.
- The use of three constructs of SES (educational level, occupational level and wealth index) in this study also provides a much better holistic approach to assessing SES association with CKD. Also, the distribution of SES in our study reflect on the national data allowing for generalization of our findings.
- Our study was limited by the use of cross sectional design which prevented us from determining causality between predictors and CKD progression.

## Introduction

In general, individuals in lower socio-economic status (SES) groups have been shown to suffer more frequently from Chronic Kidney Disease (CKD), often progressing to End Stage Renal Disease (ESRD), and associated with inadequate dialysis treatment, reduced access to kidney transplantation and poor health outcomes<sup>1</sup>. Recent studies have consistently found low SES to be associated with higher risk of CKD among people of African origin<sup>2-5</sup>.

However, in some settings the well-known inverse association between SES and CKD seems to be absent, or even reversed. For example, Bryne et al. did not find an association between SES and End Stage Renal Disease<sup>6</sup>. Invariably, others studies have consistently found a positive association between SES and CKD<sup>7 8</sup>. Specifically, as SES improved, unhealthful lifestyle (unhealthy diet, physical inactivity, smoking and alcohol consumption) increased in China while that of the United States decreased with improved SES<sup>9</sup>. People with higher incomes, in these contexts, can afford a western lifestyle, which is more readily available in the urban areas than in the rural areas. There is therefore an interaction between individual SES and environmental factors, such as food and sedentary life style in such populations<sup>10-12</sup>. Consequently, in those settings, people with a higher SES might have higher CKD risk.

In urban areas, the population in general has a higher SES than in rural areas<sup>13</sup>. For example, individuals with higher educational level migrate from rural areas to find higher occupations matching their higher education to improve on their wealth. If indeed a positive association between SES and CKD is observed in LMICs, this might underlie the well-known health differences between urban and rural areas, with urban areas having an increased risk of CKD<sup>14</sup>. So far, it is unknown whether the reversed SES gradient (higher risk in high SES group) might explain the higher burden of CKD in urban areas as compared to rural areas in Africa.

In view of this, we assessed the association of SES with CKD in rural and urban Ghana and studied what extent the higher SES of people in urban areas could account for differences in CKD between rural and urban populations.

## Methods

### *Study population and study design*

In the present analyses, data used were from the RODAM (Research on Obesity & Diabetes among African Migrants) study, a multi-centre cross-sectional study, were used. The rationale, conceptual framework, design and methodology of the RODAM study have been described in detail elsewhere<sup>15 16</sup>. As the Healthy Life in an Urban Setting (HELIUS) study conducted among Ghanaian migrants living in Amsterdam did not find any associations between SES and CKD<sup>17</sup> the current study focused on rural and urban Ghana (Ashanti region of Ghana). The RODAM study was conducted from 2012 to 2015 and it comprised of individuals aged 25-70 years living in rural and urban Ghana and Ghanaian migrants in Europe. All participants below 25 and above 70 years were excluded in the present analyses. The present analysis was restricted to the rural and urban sites (n=2492) RODAM participants. Specifically, 1043 participants from rural Ghana and 1449 from urban Ghana were used in this study.

Data collection for the study was standardized across the sites. Written informed consent was obtained from each participant prior to enrolment in the study. The respective ethics committees in Ghana and the three European countries approved the study protocols before data collection began. The response rate was 76% in rural Ghana and 74% in urban Ghana. In Ghana, participants were randomly drawn from a list of 30 enumeration areas in the Ashanti region based on the 2010 population census using the multistage random sampling. These enumeration areas came from two purposively selected urban cities (Kumasi and Obuasi) and 15 randomly selected rural communities in the Ashanti region. Selected health and community authorities were first identified, notified of the study and letters were sent giving detailed explanation of the study. We sent team members to stay among the communities to familiarize with them and organize mini clinics in the field. This lasted between 1-2 weeks depending on the sampled population and responsiveness of respondents.

In Ghana, questionnaires administration and physical examination were done at the same day/time. The participants were instructed to fast from 10.00 pm the night before the physical examination. For the current study, 2566 participants with data available on both questionnaire data and physical measurements were used. We excluded (n=74) individuals outside the RODAM age range of 25-70 years resulting in a data set of 2492 for analysis. These comprised 1,449 Urban Ghana and 1043 Rural Ghana. For the final analysis, individuals with no data on CKD status (n=42) were excluded.

## Measurements

### *Demographic and lifestyle factors*

Information on demographics, educational level, occupational level, wealth index and lifestyle factors (smoking and physical activity) were obtained by questionnaire. Physical examinations were performed with validated devices per standardized operational procedures across all study sites. Weight was measured in light clothing and without shoes with SECA 877 scales to the nearest 0.1 kg. Height was measured without shoes with a portable stadiometer (SECA 217) to the nearest 0.1 cm. Body mass index (BMI) was calculated as weight (kg) divided by height squared ( $m^2$ ). Overweight was defined as BMI of  $\geq 25$  to  $< 30$   $kg/m^2$  and obesity as BMI  $\geq 30$   $kg/m^2$ <sup>18</sup>. Waist circumference was measured in cm at the midpoint between the lower rib and the upper margin of the iliac crest. Per participant all anthropometrics were measured twice by the same assessor and the average of the two measurements were used for analyses.

### **Covariates**

Socioeconomic indicators used in this study were educational level, occupational status and level of wealth index. Educational level was determined based on self-reported highest educational qualification accomplished based on the Ghanaian educational system. Occupational level was determined based on self-reported current occupation if still employed or/and last occupation before retirement or student. The reported occupations were further coded according to the International Standard Classification of Occupations scheme (ISCO-08). Wealth index was determined using the World Health Organization (WHO) standard of wealth index classification. Wealth index was based on data collected in the Household Questionnaire. The questionnaire comprised of questions on household's ownership of several consumer items such as television, car, flooring material, toilet facilities etc. Each household was assigned a standard score for each asset. Wealth index was then expressed in five quintiles. The five quintiles were further categorized into three quintiles by combining the second and third quintiles due to small numbers<sup>19</sup>. All three SES constructs were further classified as low, medium and high SES and their relationship to each other tested.

### **Outcome: CKD prevalence**

Participants were asked to bring an early morning urine sample for the analyses of albuminuria and creatinine levels. Urinary albumin concentration (in mg/L) was measured by an immunochemical turbidimetric method (Roche Diagnostics). Urinary creatinine concentration (in  $\mu mol/L$ ) was measured by a kinetic spectrophotometric method (Roche Diagnostics). Estimated glomerular filtration rate (eGFR)



was calculated using the CKDEPI (CKD Epidemiology Collaboration) creatinine equation<sup>20</sup>. Urinary albumin-creatinine ratio (ACR; expressed in mg/g) was calculated by taking the ratio between urinary albumin and urinary creatinine. eGFR and albuminuria were categorized according to the 2012 KDIGO (Kidney Disease: Improving Global Outcomes) classification<sup>21</sup>. eGFR was categorized as follows: G1,  $\geq 90$  mL/min/1.73 m<sup>2</sup> (normal kidney function); G2, 60 to 89 mL/min/1.73 m<sup>2</sup> (mildly decreased); G3a, 45 to 59 mL/min/1.73 m<sup>2</sup> (mildly to moderately decreased); G3b, 30 to 44 mL/min/1.73 m<sup>2</sup> (moderately to severely decreased); G4, 15 to 29 mL/min/1.73 m<sup>2</sup> (severely decreased); and G5,  $< 15$  mL/min/1.73 m<sup>2</sup> (kidney failure). Albuminuria categories were derived from ACR and were as follows: A1,  $< 3$  mg/mmol (normal to mildly increased); A2, 3 to 30 mg/mmol (moderately increased); and A3,  $> 30$  mg/mmol (severely increased). CKD status was categorized according to severity of kidney disease (green, low risk; yellow, moderately increased risk; orange, high risk; and red, very high risk) using the combination of eGFR (G1-G5) and albuminuria (A1-A3) levels defined by the 2012 KDIGO guideline<sup>22</sup>. Due to the small number of participants in the very high risk category of CKD, high and very high risk groups were combined. Reduced eGFR was defined as eGFR  $< 60$  mL/min/1.73 m<sup>2</sup>. Because of the small number of participants in the severely increased albuminuria category, we defined albuminuria as ACR  $\geq 3$  mg/mmol by combining the moderately increased (A2) and severely increased (A3) categories.

### ***Other variables***

Blood pressure (BP) was measured three times using a validated semi-automated device (The Microlife WatchBP home) with appropriate cuffs in a sitting position after at least 5 min rest. The mean of the last two BP measurements was used in the analyses. Hypertension was defined as systolic BP  $\geq 140$  mmHg, and/or diastolic BP  $\geq 90$  mmHg, and/or being on antihypertensive medication treatment, and/or self-reported hypertension. Trained research assistants in the two sites collected fasting venous blood samples. All the blood samples were processed and aliquoted immediately (within one hour to maximum three hours of the vena puncture) after collection per standard operation procedures, and then temporarily stored at the local research location at  $-20^{\circ}\text{C}$ . The separated samples were then transported to the local research centres laboratories, where they were checked, registered and stored at  $-80^{\circ}\text{C}$ . To avoid intra-laboratory variability, the stored blood samples from the local research centres were transported to Berlin, Germany for biochemical analyses. Fasting plasma glucose concentration was measured using an enzymatic method (hexokinase). Type 2 diabetes was defined according to the WHO diagnostic criteria (fasting glucose  $\geq 7.0$  mmol/L, and/or current use of medication prescribed to treat diabetes, and/or self-reported diabetes)<sup>23</sup>. Concentration of total cholesterol was assessed using colorimetric test kits. All biochemical analyses were performed using an ABX Pentra 400 chemistry analyzer (ABX Pentra; Horiba ABX, Germany). Hypercholesterolemia was defined as total cholesterol level  $\geq 6.22$  mmol/L. Serum

1  
2  
3 creatinine concentration (in  $\mu\text{mol/L}$ ) was determined by a kinetic colorimetric spectrophotometric isotope  
4 dilution mass spectrometry–calibrated method (Roche Diagnostics). Biochemical analyses were subject to  
5 extensive quality checks including blinded serial measurements.  
6  
7

### 8 9 **Patient and Public Involvement**

10  
11 Community leaders were involved in the recruitment of patients. These comprised of religious  
12 communities (churches and mosques), endorsement from local key leaders and establishing relationships  
13 with healthcare organizations. We also provided information on the study by involving the local media  
14 (radio and television stations). We sent letters to all selected health and community authorities to notify  
15 participants of the study. Team members were sent to the various community to stay among the  
16 community and organize mini clinics for a period of 1-2 weeks. Results of the study were disseminated  
17 through seminars, durbars and via radio and television stations.  
18  
19  
20  
21

### 22 23 **Statistical methods**

24  
25 Participants' characteristics were expressed as absolute numbers and percentages for categorical variables  
26 and as means and standard deviations (SD) for continuous variables. CKD prevalence with 5% error bars  
27 were presented as bar graphs for each SES construct across rural and urban Ghana. Spearman's rank  
28 correlation was used to determine correlations between the three SES constructs. Odds ratios (ORs) and  
29 their corresponding 95% confidence intervals (CIs) were estimated by means of logistic regression  
30 analyses to study the odds of albuminuria ( $\text{ACR} > 3 \text{ mg/mmol}$ , A2-A3, moderately to severely increased  
31 albuminuria), reduced kidney function ( $\text{eGFR} < 60 \text{ mL/min/1.73 m}^2$ , G3-G5 moderately to severely  
32 decreased kidney function) and increased CKD risk (high and very high CKD risk), with adjustments for  
33 potential covariates (age and sex). These covariates were adjusted for to account for their impact in the  
34 pathway of CKD incidence, prevalence and progression<sup>24</sup>. Model 1 was age and sex adjusted. The  
35 analyses were performed for the total population (using low educational level, low occupational status  
36 and low level of wealth index as reference categories). Further analysis was conducted using rural Ghana  
37 as reference. Model 1 was adjusted for age and sex while model 2 was adjusted for age, sex and  
38 educational level. Model 3 was adjusted for age, sex and occupational status while model 4 was adjusted  
39 for age, sex and level of wealth index ( $p < 0.05$ ). Tolerance test and variance inflation factor (VIF) showed  
40 very small degree of collinearity among SES predictors thus we adjusted for each of SES variables  
41 separately. Complete case analysis approach was used. All data available were included in the age-  
42 adjusted models. All analyses were performed using STATA, version 14.0 (StataCorp LP).  
43  
44  
45  
46  
47  
48  
49  
50  
51  
52  
53

### 54 55 **Results**

Table 1 shows characteristics of study participants. Participants in rural Ghana were slightly older than those in urban Ghana. Female preponderance was observed in both rural and urban Ghana, though higher proportions were observed in urban Ghana. Individuals living in rural Ghana were generally less educated compared with those living in urban Ghana. There were slightly more individuals with low occupational status in urban Ghana compared with their peers in rural Ghana. People in urban Ghana were wealthier than their rural counterparts. Rural Ghanaians were more physically active compared with their urban peers. Smoking was low among Ghanaians though rural Ghanaians were more likely to smoke compared with their urban peers. Hypercholesterolemia was more prevalent in urban Ghana than in rural Ghana. Hypertension and type 2 diabetes were more prevalent in urban Ghanaians compared with those living in rural Ghana. Urban Ghanaians were markedly more obese compared with their rural peers. Except for eGFR, albuminuria and CKD risk prevalence rates were higher in urban Ghana compared with rural Ghana.

**Table 1: Baseline characteristics by location**

|                               | Rural Ghana | Urban Ghana |
|-------------------------------|-------------|-------------|
| Number of participants, N (%) | 1043 (41.9) | 1449 (58.1) |
| Mean age, years (SD)          | 46.5 (12.6) | 45.2 (11.4) |
| Females, N (%)                | 638 (61.2)  | 1034 (71.4) |
| Educational level n (%)       |             |             |
| Low                           | 555 (56.9)  | 614 (43.9)  |
| Middle                        | 311 (31.9)  | 547 (39.1)  |
| High                          | 108 (11.8)  | 239 (17.0)  |
| Occupational status, n (%)    |             |             |
| Low                           | 250 (25.7)  | 374 (26.7)  |
| Middle                        | 628 (64.5)  | 818 (58.4)  |
| High                          | 96 (9.8)    | 209 (14.9)  |
| Wealth index, n (%)           |             |             |
| Low                           | 449 (46.5)  | 368 (26.6)  |
| Middle                        | 276 (28.6)  | 416 (30.0)  |
| High                          | 241 (24.9)  | 602 (43.4)  |
| Low physical activity, n (%)  | 663 (47.22) | 592 (60.7)  |
| Smoking, n (%)                | 22 (2.3)    | 14 (1.0)    |
| Hypercholesterolemia, n (%)   | 78 (7.6)    | 270 (18.7)  |
| Hypertension, n (%)           | 306 (29.3)  | 531 (36.7)  |
| Diabetes, n (%)               | 53 (5.1)    | 153 (10.6)  |

1  
2  
3  
4  
5  
6  
7  
8  
9  
10  
11  
12  
13  
14  
15  
16  
17  
18  
19  
20  
21  
22  
23  
24  
25  
26  
27  
28  
29  
30  
31  
32  
33  
34  
35  
36  
37  
38  
39  
40  
41  
42  
43  
44  
45  
46  
47  
48  
49  
50  
51  
52  
53  
54  
55  
56  
57  
58  
59  
60

|                                                           |            |             |
|-----------------------------------------------------------|------------|-------------|
| Albuminuria, n (%)                                        |            |             |
| A1, Normal to mildly increased (ACR <3 mg/mmol)           | 930 (91.6) | 1285 (89.1) |
| A2-A3, moderately to severely increased (ACR ≥ 3 mg/mmol) | 85 (8.4)   | 158 (10.9)  |
| eGFR, n (%)                                               |            |             |
| G1-G2 (≥ 60 mL/min/1.73m <sup>2</sup> )                   | 989 (96.3) | 1388 (96.3) |
| G3-G5 (<60 mL/min/1.73m <sup>2</sup> )                    | 38 (3.7)   | 54 (3.7)    |
| CKD risk, n (%)                                           |            |             |
| Low risk (green)                                          | 916 (90.5) | 1281 (88.9) |
| Moderately increased to very high risk (yellow to red)    | 96 (9.5)   | 160 (11.1)  |

**Abbreviations:** N, number of respondents; SD, standard deviation; eGFR, estimated glomerular filtration rate; ACR, albumin creatinine ratio; CKD, Chronic kidney disease

Figure 1 shows prevalence of CKD by level of education in urban and rural Ghana. Prevalence of CKD decreased with increasing levels of education in rural Ghana. Higher prevalence of CKD was observed among individuals with low educational level compared with those with middle and high educational level. However, those with high educational level in urban Ghana had higher prevalence of CKD compared with those with middle level education. For occupational status, prevalence of CKD was higher among individuals with low occupational status in urban Ghana. Similar patterns were observed in rural Ghana, however, those with higher occupational status had higher prevalence of CKD compared with those with middle occupational status (Figure 2). Figure 3 shows prevalence of CKD by level of wealth index. CKD prevalence among the levels of wealth index varied between urban and rural Ghana. Those with middle level wealth index had higher prevalence of CKD compared with those with low or high CKD prevalence in both rural and urban Ghana. CKD prevalence rate for low and high level wealth index in urban Ghana was the same while that of rural Ghana was slightly different.

1  
2  
3  
4  
5  
6  
7  
8  
9  
10  
11  
12  
13  
14  
15  
16  
17  
18  
19  
20  
21  
22  
23  
24  
25  
26  
27  
28  
29  
30  
31  
32  
33  
34  
35  
36  
37  
38  
39  
40  
41  
42  
43  
44  
45  
46  
47

In urban Ghana, high educational level was positively associated with high wealth index but inversely associated with occupation. In rural Ghana, high education was positively associated with high wealth index, but there was no significant association between education and occupation. High wealth index was inversely associated with high occupational status in both rural and urban Ghana (Table 2).

**Table 2: Relationship between SES constructs (educational, occupational level and wealth index) by urban rural Ghana**

| <b>Correlation matrix</b> | <b>Educational level</b> | <b>Occupational level</b> | <b>Wealth index</b> | <b>SES</b> |
|---------------------------|--------------------------|---------------------------|---------------------|------------|
| <b>Urban Ghana</b>        |                          |                           |                     |            |
| Educational level         | 1.000                    |                           |                     |            |
| Occupational status       | -0.115*                  | 1.000                     |                     |            |
| Wealth Index              | 0.294*                   | -0.126*                   | 1.000               |            |
| Composite SES             | 0.576*                   | -0.024                    | 0.937*              | 1.000      |
| <b>Rural Ghana</b>        |                          |                           |                     |            |
| Educational level         | 1.000                    |                           |                     |            |
| Occupational status       | 0.017                    | 1.000                     |                     |            |
| Wealth Index              | 0.219*                   | -0.135*                   | 1.000               |            |
| SES                       | 0.504*                   | 0.029                     | 0.934*              | 1.000      |

**Significant at 1%, Spearman’s correlation**

Table 3 shows association between level of education, occupational status, level of wealth index and prevalence of CKD. After adjusting for age and sex, we observed no significant association between SES indicators (educational level, occupational status and wealth index) and CKD in urban Ghana. In rural Ghana, whereas educational level and occupational status were not associated with CKD prevalence, high wealth index was significantly associated with higher odds of reduced eGFR.

**Table 3: Association of SES indicators (educational level, occupational status and wealth index level) with albuminuria, reduced eGFR and CKD risk**

|                            | Albuminuria (ACR $\geq$ 3 mg/mmol) |                        | eGFR < 60 mL/min/1.73 m <sup>2</sup> |                        | High to very high CKD risk (KDIGO, 2012) |                        |
|----------------------------|------------------------------------|------------------------|--------------------------------------|------------------------|------------------------------------------|------------------------|
|                            | n (%)                              | OR (95% CI)<br>Model 1 | n (%)                                | OR (95% CI)<br>Model 1 | n cases (%)                              | OR (95% CI)<br>Model 1 |
| <b>Education</b>           |                                    |                        |                                      |                        |                                          |                        |
| <b>Urban Ghana</b>         |                                    |                        |                                      |                        |                                          |                        |
| Low                        | 612 (14.7)                         | 1.00 (Reference)       | 612 (4.1)                            | 1.00 (Reference)       | 612 (14.1)                               | 1.00 (Reference)       |
| Middle                     | 546 (7.8)                          | 0.51 (0.34-0.76)       | 546 (3.7)                            | 1.12 (0.59-2.12)       | 545 (8.1)                                | 0.59 (0.39-0.89)       |
| High                       | 238 (8.4)                          | 0.53 (0.31-0.91)       | 238 (3.4)                            | 0.91 (0.37-2.19)       | 238 (10.9)                               | 0.83 (0.51-1.38)       |
| <b>Rural Ghana</b>         |                                    |                        |                                      |                        |                                          |                        |
| Low                        | 540 (8.7)                          | 1.00 (Reference)       | 548 (3.8)                            | 1.00 (Reference)       | 538 (9.5)                                | 1.00 (Reference)       |
| Middle                     | 301 (6.3)                          | 0.89 (0.51-1.59)       | 303 (3.9)                            | 1.69 (0.77-3.66)       | 300 (8.7)                                | 1.33 (0.79-2.25)       |
| High                       | 105 (3.8)                          | 0.66 (0.23-1.95)       | 107 (2.8)                            | 1.28 (0.35-4.71)       | 105 (3.8)                                | 0.69 (0.23-2.02)       |
| <b>Occupational status</b> |                                    |                        |                                      |                        |                                          |                        |
| <b>Urban Ghana</b>         |                                    |                        |                                      |                        |                                          |                        |
| Low                        | 207 (10.1)                         | 1.00 (Reference)       | 207 (6.8)                            | 1.00 (Reference)       | 207 (12.1)                               | 1.00 (Reference)       |
| Middle                     | 817 (11.1)                         | 1.50 (0.88-2.83)       | 817 (3.6)                            | 1.15 (0.56-2.35)       | 816 (11.6)                               | 1.37 (0.84-2.56)       |
| High                       | 373 (11.0)                         | 1.57 (0.89-2.53)       | 373 (2.7)                            | 1.02 (0.41-2.52)       | 373 (9.7)                                | 1.21 (0.68-2.14)       |
| <b>Rural Ghana</b>         |                                    |                        |                                      |                        |                                          |                        |

1  
2  
3  
4  
5  
6  
7  
8  
9  
10  
11  
12  
13  
14  
15  
16  
17  
18  
19  
20  
21  
22  
23  
24  
25  
26  
27  
28  
29  
30  
31  
32  
33  
34  
35  
36  
37  
38  
39  
40  
41  
42  
43  
44  
45  
46  
47

|                     |            |                  |           |                         |            |                  |
|---------------------|------------|------------------|-----------|-------------------------|------------|------------------|
| Low                 | 95 (10.5)  | 1.00 (Reference) | 96 (10.4) | 1.00 (Reference)        | 95 (14.7)  | 1.00 (Reference) |
| Middle              | 610 (6.7)  | 0.65 (0.31-1.37) | 619 (3.1) | 0.37 (0.16-0.85)        | 608 (7.6)  | 0.55 (0.28-1.08) |
| High                | 241 (8.3)  | 0.99 (0.43-2.28) | 243 (2.9) | 0.51 (0.18-1.44)        | 240 (9.2)  | 0.94 (0.44-2.01) |
| <b>Wealth index</b> |            |                  |           |                         |            |                  |
| <b>Urban Ghana</b>  |            |                  |           |                         |            |                  |
| Low                 | 367 (11.2) | 1.00 (Reference) | 367 (3.5) | 1.00 (Reference)        | 367 (10.1) | 1.00 (Reference) |
| Middle              | 414 (12.3) | 1.12 (0.73-1.74) | 414 (3.9) | 1.30 (0.61-2.80)        | 413 (13.1) | 1.45 (0.93-2.27) |
| High                | 601 (9.8)  | 0.82 (0.55-1.25) | 600 (3.8) | 1.13 (0.55-2.31)        | 600 (10.8) | 1.11 (0.72-1.71) |
| <b>Rural Ghana</b>  |            |                  |           |                         |            |                  |
| Low                 | 441 (7.9)  | 1.00 (Reference) | 446 (3.1) | 1.00 (Reference)        | 441 (8.4)  | 1.00 (Reference) |
| Middle              | 264 (8.7)  | 1.13 (0.65-1.98) | 269 (3.7) | 1.22 (0.52-2.84)        | 262 (10.3) | 1.31 (0.77-2.25) |
| High                | 234 (5.6)  | 0.78 (0.40-1.53) | 235 (5.1) | <b>2.38 (1.03-5.47)</b> | 233 (7.7)  | 1.16 (0.63-2.14) |

Model 1, adjusted for age and sex; Abbreviations: CI, confidence interval; ACR, albumin creatinine ration; eGFR, estimated glomerular filtration rate; CKD, chronic kidney disease; OR, odds ratio, n= total number of individuals in rural and urban Ghana among the various levels of SES constructs; %, proportion of individuals with CKD among the various levels of SES constructs in rural and urban Ghana.

Table 4 shows the contribution of all three SES constructs to rural and urban CKD prevalence differences. The odds of albuminuria and CKD risk was significantly higher in urban Ghana compared with rural Ghana. The higher rate of CKD observed in urban Ghana was not explained by the higher SES of that population as compared to their rural counterparts.

**Table 4: Contribution of SES indicators to rural-urban differences in albuminuria, reduced eGFR and CKD risk**

|                                                      |              | OR (95% CI)<br>Model 1  | OR (95% CI)<br>Model 2  | OR (95% CI)<br>Model 3  | OR (95% CI)<br>Model 4  |
|------------------------------------------------------|--------------|-------------------------|-------------------------|-------------------------|-------------------------|
| <b>Albuminuria (ACR <math>\geq</math> 3 mg/mmol)</b> |              |                         |                         |                         |                         |
| Sites                                                | n cases (%)  |                         |                         |                         |                         |
| Urban Ghana                                          | 1,443 (10.9) | <b>1.37 (1.03-1.81)</b> | <b>1.70 (1.25-2.31)</b> | <b>1.55 (1.15-2.10)</b> | <b>1.62 (1.18-2.19)</b> |
| Rural Ghana                                          | 1,015 (8.4)  | 1.00 (Reference)        | 1.00 (Reference)        | 1.00 (Reference)        | 1.00 (Reference)        |
| <b>eGFR &lt; 60 mL/min/1.73 m<sup>2</sup></b>        |              |                         |                         |                         |                         |
| Sites                                                | n cases (%)  |                         |                         |                         |                         |
| Urban Ghana                                          | 1,442 (3.7)  | 1.27 (0.82-1.97)        | 1.20 (0.76-1.89)        | 1.18 (0.79-1.86)        | 1.12 (0.70-1.78)        |
| Rural Ghana                                          | 1,027 (3.7)  | 1.00 (Reference)        | 1.00 (Reference)        | 1.00 (Reference)        | 1.00 (Reference)        |
| <b>High to very high CKD risk</b>                    |              |                         |                         |                         |                         |
| Sites                                                | n cases (%)  |                         |                         |                         |                         |
| Urban Ghana                                          | 1,441 (11.1) | <b>1.23 (1.01-1.62)</b> | <b>1.44 (1.07-1.93)</b> | <b>1.38 (1.03-1.84)</b> | <b>1.36 (1.01-1.83)</b> |
| Rural Ghana                                          | 1,012 (9.46) | 1.00 (Reference)        | 1.00 (Reference)        | 1.00 (Reference)        | 1.00 (Reference)        |

Model 1: adjusted for age and sex; Model 2: adjusted for age, sex and education level; Model 3: adjusted for age, sex and occupational status; Model 4: adjusted for age, sex and wealth index; Abbreviations: CI, confidence interval; ACR, albumin creatinine ration; eGFR, estimated glomerular filtration rate; CKD, chronic kidney disease; OR, odds ratio, n=number of participants. n= total number of individuals in rural and urban Ghana; %, proportion of individuals with CKD among urban and rural Ghana.



## Discussion

### *Key findings*

Our study findings show no association between all three SES constructs and the prevalence of CKD in both rural and urban Ghana except for wealth index in rural Ghana, with the risk of CKD being higher in the wealthier populations. The higher rate of CKD observed in urban Ghana could not be attributed to the higher SES of that population compared to their rural counterparts.

### Discussion of key findings

#### *Association of SES with CKD in rural and urban Ghana*

Our study did not find any significant associations between all three SES constructs and CKD among rural and urban Ghana except for wealth index in rural Ghana. The positive association observed between wealth index in rural Ghana may be due to a number of reasons. A comparison of the three SES constructs showed higher educational level to be associated with wealth index in both rural and urban Ghana but not occupational level. This seems to suggest that occupational level may not be adequately capturing the SES status of individuals living in these settings in relation to CKD. For example, Masthi et al, compared different SES scales in rural and urban India and concluded that Standard of Living Index (SLI) scale was more accurate for classification of SES in urban and rural setting<sup>25</sup>. Our finding is consistent with other studies<sup>6 26</sup> which reported no association between SES and CKD in high-income countries and LMICs, but in contrast with other studies<sup>2-4 27</sup> that found positive associations between SES and CKD. The reasons for our current finding are unclear. However, it has been suggested that these inconsistent associations may be due to the varying pathways through which the effect of SES on health status is mediated. For example, at a given educational level marked ethnic differences have been reported. Additionally, similar differences were observed for wealth status at a given income level<sup>28-30</sup>.

#### *Contribution of SES to observed CKD risk differences between rural and urban Ghana*

We observed higher rates of CKD in urban Ghana compared with rural Ghana, as expected. The observed higher rates of CKD in our study were not explained by the higher SES of that population as compared to their rural counterparts. Our results indicate that this is due to the lack of a clear difference in the SES distribution of rural and urban Ghana observed in this study, as well as to the lack of associations between SES and CKD. Consistent with our findings, in a study conducted in Northern Tanzania SES did not explain increased risk of CKD in urban Tanzania<sup>26</sup>. The lack of associations between SES and CKD

1  
2  
3 could probably partly be explained by the process of epidemiological transition in relation to the  
4 “diffusion theory” of ischemic heart disease mortality. This theory attributes the commencement of  
5 ischemic heart disease to individuals in the high SES group due to their ability to afford behaviours  
6 (smoking, alcohol and sedentary lifestyles) which increased risk of ischemic heart disease. The lower SES  
7 groups were later affected partially because of improved living standards, imitation and urbanization. The  
8 higher SES groups were the first to embrace behavioural changes required to decrease the risk of ischemic  
9 heart disease and this resulted in reversing the gradient <sup>31</sup>. The rapid urbanization of some rural  
10 communities in the Ashanti region of Ghana and the imitation of urban lifestyle could account for our  
11 finding. Also, it could be that whereas the high SES group in urban Ghana has already embraced  
12 favourable behavioural changes, those in rural Ghana are yet to do so <sup>32</sup>. This explains the observed  
13 association of wealth index with CKD in rural Ghana but not in urban Ghana. The complexities of  
14 influence of SES on prevalence and progression of CKD and the differential prevalence of established  
15 risk factors (diabetes, obesity and hypertension) in rural and urban Ghana may also contribute to the  
16 different associations of SES with CKD prevalence observed in rural and urban Ghana. In our study, the  
17 prevalence rates of hypercholesterolemia, hypertension and type 2 diabetes were substantially higher in  
18 urban Ghana compared with that of rural Ghana. Also, the interplay of other less understood or researched  
19 factors (e.g., exposure to nephrotoxins, herbal medications, sepsis) may be influencing the pathway in  
20 which SES influences CKD prevalence and progression.  
21  
22  
23  
24  
25  
26  
27  
28  
29  
30  
31

### 32 ***Strength and limitation***

33  
34  
35 Our study presents several strengths. First, we used well-standardized study protocols across rural and  
36 urban Ghana. Our study is also the first in Africa to use all three categories of CKD definition  
37 (albuminuria, reduced eGFR and CKD risk) by KDIGO 2012 in assessing association of SES with CKD  
38 in rural and urban setting, this provides a more detailed information on CKD outcomes. The limitation of  
39 intra laboratory variability in earlier studies was eliminated using the same standard operating procedures  
40 in the same laboratory for running all samples for both rural and urban Ghana. The use of three constructs  
41 of SES in this study also provides a much better holistic approach to assessing SES. Also, the distribution  
42 of SES in our study reflect on the national data allowing for generalization of our findings. Our study was  
43 limited by the use of cross sectional design which prevented us from determining causality between  
44 predictors and CKD progression.  
45  
46  
47  
48  
49  
50  
51  
52  
53  
54  
55  
56  
57  
58  
59  
60

## Conclusion

All three SES constructs appear not to be associated with prevalence of CKD in urban and rural Ghana except for wealth index in rural Ghana. The observed higher prevalence of CKD in urban Ghana was not explained by the higher SES in urban Ghana. Our study seems to suggest that other non-traditional factors such as nephrotoxins, herbal medications and misuse of over the counter drugs may play a role and underscores the need to further explore these factors.

## Acknowledgement

The authors are very grateful to the research assistants, interviewers and other staff of the five research locations who took part in gathering the data and the Ghanaian volunteers in all the participating RODAM sites. We gratefully acknowledge the advisory board members for their valuable support in shaping the RODAM study methods and the Academic Medical Centre Biobank for their support in biobank management and high-quality storage of collected samples.

## Contributors

My co-authors have all contributed substantially to this manuscript and approve of this submission. Research idea and study design: DNA, CA, KS, DA, EB, KM, JA; data acquisition and curation: DNA, CA, EB, KM, data analysis/interpretation: DNA, CA, KS, DA, EB, KM, LS, JA, EOD, KKB, FPM, ID, JS, SB, ADA; statistical analysis: DNA, CA, KS. DNA, CA, KS, DA, EB, KM, LS, JA, EOD, KKB, FPM, ID, JS, SB, ADA contributed important intellectual content during manuscript drafting or revision and accepts accountability for the overall work by ensuring that questions pertaining to the accuracy or integrity of any portion of the work are appropriately investigated and resolved. DNA and CA takes responsibility that this study has been reported honestly, accurately, and transparently; that no important aspects of the study have been omitted; and that any discrepancies from the study as planned have been explained.

## Funding

This work was supported by the European Commission under the Framework Programme (Grant Number: 278901). The funders had no role in study design, data collection and analysis, decision to

1  
2  
3 publish, or preparation of the manuscript. The Wellcome Trust supported Professor Smeeth's  
4  
5 contribution, grant number WT082178. Professor Joachim Spranger was supported by the DZHK  
6  
7 (German Center for cardiovascular research) and the Berlin Institute of Health (BIH).  
8  
9

10 **Competing interest:** I have communicated with all my co-authors and obtained their full  
11 disclosures. My co-authors and I declare no conflicts of interest.  
12  
13

14 **Patient Consent:** None declared  
15

16 **Ethics approval:** IRBs at each participating site.  
17  
18

19 **Data sharing statement:** Data are available from the RODAM research cohort, a third party. Dr.  
20 Eric Beune affiliated with the RODAM research cohort and a co-author of this paper in  
21 accordance with the RODAM requirements for collaboration. Dr. Beune is the Data Collection  
22 Coordinator of RODAM and may be contacted with further questions (e.j.beune@amc.uva.nl).  
23  
24 Additionally, researchers interested in further collaboration with RODAM may see the following  
25  
26 URL: <http://www.rod-am.eu/>  
27  
28  
29  
30  
31  
32  
33  
34  
35  
36  
37  
38  
39  
40  
41  
42  
43  
44  
45  
46  
47  
48  
49  
50  
51  
52  
53  
54  
55  
56  
57  
58  
59  
60

## References

1. Patzer RE, McClellan WM. Influence of race, ethnicity and socioeconomic status on kidney disease. *Nature Reviews Nephrology* 2012;8(9):533-41.
2. Merkin SS, Roux AVD, Coresh J, et al. Individual and neighborhood socioeconomic status and progressive chronic kidney disease in an elderly population: The Cardiovascular Health Study. *Soc Sci Med* 2007;65(4):809-21.
3. Bello AK, Peters J, Rigby J, et al. Socioeconomic status and chronic kidney disease at presentation to a renal service in the United Kingdom. *Clin J Am Soc Nephrol* 2008;3(5):1316-23.
4. Crews DC, Charles RF, Evans MK, et al. Poverty, race, and CKD in a racially and socioeconomically diverse urban population. *Am J Kidney Dis* 2010;55(6):992-1000.
5. Shoham DA, Vupputuri S, Roux AVD, et al. Kidney disease in life-course socioeconomic context: the Atherosclerosis Risk in Communities (ARIC) Study. *Am J Kidney Dis* 2007;49(2):217-26.
6. Byrne C, Nedelman J, Luke RG. Race, socioeconomic status, and the development of end-stage renal disease. *Am J Kidney Dis* 1994;23(1):16-22.
7. Popkin BM. The shift in stages of the nutrition transition in the developing world differs from past experiences! *Public Health Nutr* 2002;5(1A):205-14.
8. Du S, Lu B, Zhai F, et al. A new stage of the nutrition transition in China. *Public Health Nutr* 2002;5(1a):169-74.
9. Kim S, Symons M, Popkin BM. Contrasting socioeconomic profiles related to healthier lifestyles in China and the United States. *Am J Epidemiol* 2004;159(2):184-91.
10. Adler NE, Ostrove JM. Socioeconomic status and health: what we know and what we don't. *Ann N Y Acad Sci* 1999;896(1):3-15.
11. Anderson NB, Armstead CA. Toward understanding the association of socioeconomic status and health: A new challenge for the biopsychosocial approach. *Psychosom Med* 1995;57(3):213-25.
12. Feinstein JS. The relationship between socioeconomic status and health: a review of the literature. *The Milbank Quarterly* 1993:279-322.
13. Samuel P, Antonisamy B, Raghupathy P, et al. Socio-economic status and cardiovascular risk factors in rural and urban areas of Vellore, Tamilnadu, South India. *Int J Epidemiol* 2012;41(5):1315-27.
14. Christie S, Fone DL. Does car ownership reflect socio-economic disadvantage in rural areas? A cross-sectional geographical study in Wales, UK. *Public Health* 2003;117(2):112-16.
15. Agyemang C, Beune E, Meeks K, et al. Rationale and cross-sectional study design of the Research on Obesity and type 2 Diabetes among African Migrants: the RODAM study. *BMJ open* 2015;4(3):e004877.
16. Addo J, Agyemang C, Aikins Ad-G, et al. Association between socioeconomic position and the prevalence of type 2 diabetes in Ghanaians in different geographic locations: the RODAM study. *J Epidemiol Community Health* 2017;jech-2016-208322.
17. Adjei DN, Stronks K, Adu D, et al. Relationship between educational and occupational levels, and Chronic Kidney Disease in a multi-ethnic sample-The HELIUS study. *PLoS One* 2017;12(11):e0186460.

18. Consultation WE. Waist circumference and waist-hip ratio. *Report of a WHO Expert Consultation Geneva: World Health Organization* 2008:8-11.
19. Rutstein SO, Johnson K, MEASURE OM. The DHS wealth index: ORC Macro, MEASURE DHS 2004.
20. Stevens LA, Schmid CH, Greene T, et al. Comparative performance of the CKD epidemiology collaboration (CKD-EPI) and the modification of diet in renal disease (MDRD) study equations for estimating GFR levels above 60 mL/min/1.73 m<sup>2</sup>. *Am J Kidney Dis* 2010;56(3):486-95.
21. Eknoyan G, Lameire N, Eckardt K, et al. KDIGO 2012 clinical practice guideline for the evaluation and management of chronic kidney disease. *Kidney Int* 2013;3:5-14.
22. KDIGO G. Work Group. KDIGO clinical practice guideline for glomerulonephritis. *Kidney inter, Suppl* 2012;2:139-274.
23. Association AD. Standards of medical care in diabetes—2014. *Diabetes Care* 2014;37(Supplement 1):S14-S80.
24. Collins AJ, Foley RN, Herzog C, et al. US Renal Data System 2010 Annual Data Report. *American journal of kidney diseases: the official journal of the National Kidney Foundation* 2011;57(1 Suppl 1):A8, e1.
25. Masthi NR, Gangaboraiah PK. An exploratory study on socio economic status scales in a rural and urban setting. *Journal of family medicine and primary care* 2013;2(1):69.
26. Stanifer JW, Maro V, Egger J, et al. The epidemiology of chronic kidney disease in Northern Tanzania: a population-based survey. *PLoS One* 2015;10(4):e0124506.
27. Bruce MA, Beech BM, Crook ED, et al. Association of socioeconomic status and CKD among African Americans: the Jackson Heart Study. *Am J Kidney Dis* 2010;55(6):1001-08.
28. Braveman PA, Cubbin C, Egerter S, et al. Socioeconomic status in health research: one size does not fit all. *JAMA* 2005;294(22):2879-88.
29. Gilthorpe MS, Wilson RC. Rural/urban differences in the association between deprivation and healthcare utilisation. *Soc Sci Med* 2003;57(11):2055-63.
30. Choi AI, Weekley CC, Chen S-C, et al. Association of educational attainment with chronic disease and mortality: the Kidney Early Evaluation Program (KEEP). *Am J Kidney Dis* 2011;58(2):228-34.
31. Mackenbach JP, Cavelaars A, Kunst AE, et al. Socioeconomic inequalities in cardiovascular disease mortality. An international study. *Eur Heart J* 2000;21(14):1141-51.
32. McKay L, Macintyre S, Ellaway A. Migration and health: a review of the international literature. MRC Social and Public Health Sciences Unit, Occasional Paper No. 12. *Glasgow: Medical Research Council[Links]* 2003

### Legend for figures

Figure 1: Prevalence of chronic kidney disease (CKD) across level of education among urban and rural participants. Definitions according to 2012 KDIGO (Kidney Disease: Improving Global Outcomes) guideline. CKD was defined as being in moderately increased risk, high-risk, or very high-risk groups.

Figure 2: Prevalence of chronic kidney disease (CKD) across occupational status among urban and rural participants. Definitions according to 2012 KDIGO (Kidney Disease: Improving Global Outcomes) guideline. CKD was defined as being in moderately increased risk, high-risk, or very high-risk groups.

Figure 3: Prevalence of chronic kidney disease (CKD) across wealth index categories among urban and rural participants. Definitions according to 2012 KDIGO (Kidney Disease: Improving Global Outcomes) guideline. CKD was defined as being in moderately increased risk, high-risk, or very high-risk groups.

1  
2  
3  
4  
5  
6  
7  
8  
9  
10  
11  
12  
13  
14  
15  
16  
17  
18  
19  
20  
21  
22  
23  
24  
25  
26  
27  
28  
29  
30  
31  
32  
33  
34  
35  
36  
37  
38  
39  
40  
41  
42  
43  
44  
45  
46  
47  
48  
49  
50  
51  
52  
53  
54  
55  
56  
57  
58  
59  
60

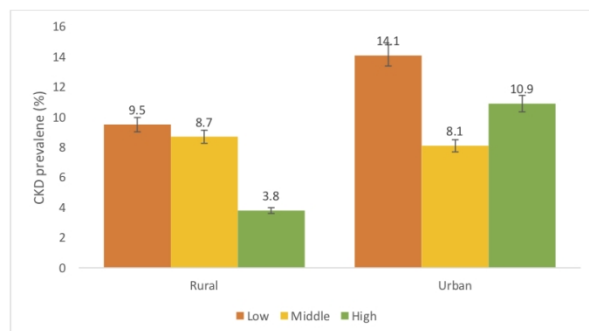

Figure 1: Prevalence of chronic kidney disease (CKD) across level of education among urban and rural participants Definitions according to 2012 KDIGO (Kidney Disease: Improving Global Outcomes) guideline. CKD was defined as being in moderately increased risk, high-risk, or very high-risk groups

Figure 1: Prevalence of chronic kidney disease (CKD) across level of education among urban and rural participants Definitions according to 2012 KDIGO (Kidney Disease: Improving Global Outcomes) guideline. CKD was defined as being in moderately increased risk, high-risk, or very high-risk groups

215x279mm (150 x 150 DPI)



1  
2  
3  
4  
5  
6  
7  
8  
9  
10  
11  
12  
13  
14  
15  
16  
17  
18  
19  
20  
21  
22  
23  
24  
25  
26  
27  
28  
29  
30  
31  
32  
33  
34  
35  
36  
37  
38  
39  
40  
41  
42  
43  
44  
45  
46  
47  
48  
49  
50  
51  
52  
53  
54  
55  
56  
57  
58  
59  
60

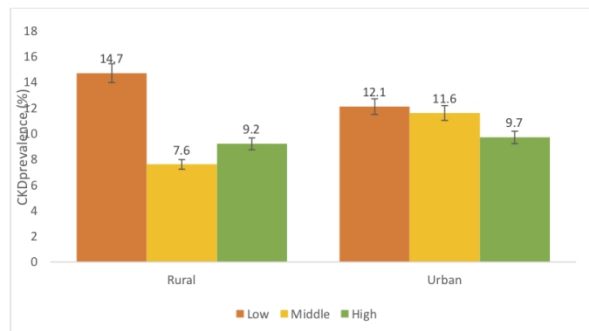

Figure 2: Prevalence of chronic kidney disease (CKD) across occupational status among urban and rural participants. Definitions according to 2012 KDIGO (Kidney Disease: Improving Global Outcomes) guideline. CKD was defined as being in moderately increased risk, high-risk, or very high-risk groups

Figure 2: Prevalence of chronic kidney disease (CKD) across occupational status among urban and rural participants. Definitions according to 2012 KDIGO (Kidney Disease: Improving Global Outcomes) guideline. CKD was defined as being in moderately increased risk, high-risk, or very high-risk groups

215x279mm (150 x 150 DPI)

1  
2  
3  
4  
5  
6  
7  
8  
9  
10  
11  
12  
13  
14  
15  
16  
17  
18  
19  
20  
21  
22  
23  
24  
25  
26  
27  
28  
29  
30  
31  
32  
33  
34  
35  
36  
37  
38  
39  
40  
41  
42  
43  
44  
45  
46  
47  
48  
49  
50  
51  
52  
53  
54  
55  
56  
57  
58  
59  
60

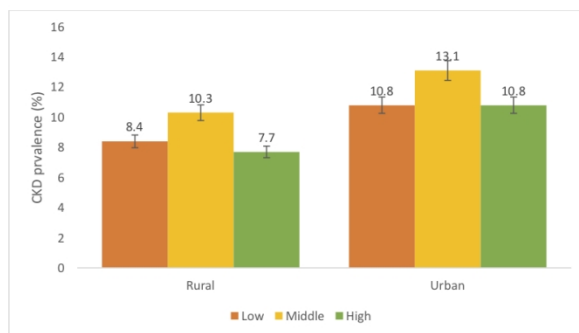

Figure 3: Prevalence of chronic kidney disease (CKD) across wealth index categories among urban and rural participants. Definitions according to 2012 KDIGO (Kidney Disease: Improving Global Outcomes) guideline. CKD was defined as being in moderately increased risk, high-risk, or very high-risk groups

Figure 3: Prevalence of chronic kidney disease (CKD) across wealth index categories among urban and rural participants. Definitions according to 2012 KDIGO (Kidney Disease: Improving Global Outcomes) guideline. CKD was defined as being in moderately increased risk, high-risk, or very high-risk groups

215x279mm (150 x 150 DPI)

# BMJ Open

## A CROSS-SECTIONAL STUDY OF ASSOCIATION BETWEEN SOCIOECONOMIC INDICATORS AND CHRONIC KIDNEY DISEASE IN RURAL-URBAN GHANA-THE RODAM STUDY

|                                 |                                                                                                                                                                                                                                                                                                                                                                                                                                                                                                                                                                                                                                                                                                                                                                                                                                                                                                                                                                                                                                                                                                                                                                                                                                                                                                                                                                                                                                                                                                                                                                                          |
|---------------------------------|------------------------------------------------------------------------------------------------------------------------------------------------------------------------------------------------------------------------------------------------------------------------------------------------------------------------------------------------------------------------------------------------------------------------------------------------------------------------------------------------------------------------------------------------------------------------------------------------------------------------------------------------------------------------------------------------------------------------------------------------------------------------------------------------------------------------------------------------------------------------------------------------------------------------------------------------------------------------------------------------------------------------------------------------------------------------------------------------------------------------------------------------------------------------------------------------------------------------------------------------------------------------------------------------------------------------------------------------------------------------------------------------------------------------------------------------------------------------------------------------------------------------------------------------------------------------------------------|
| Journal:                        | <i>BMJ Open</i>                                                                                                                                                                                                                                                                                                                                                                                                                                                                                                                                                                                                                                                                                                                                                                                                                                                                                                                                                                                                                                                                                                                                                                                                                                                                                                                                                                                                                                                                                                                                                                          |
| Manuscript ID                   | bmjopen-2018-022610.R1                                                                                                                                                                                                                                                                                                                                                                                                                                                                                                                                                                                                                                                                                                                                                                                                                                                                                                                                                                                                                                                                                                                                                                                                                                                                                                                                                                                                                                                                                                                                                                   |
| Article Type:                   | Research                                                                                                                                                                                                                                                                                                                                                                                                                                                                                                                                                                                                                                                                                                                                                                                                                                                                                                                                                                                                                                                                                                                                                                                                                                                                                                                                                                                                                                                                                                                                                                                 |
| Date Submitted by the Author:   | 18-Jul-2018                                                                                                                                                                                                                                                                                                                                                                                                                                                                                                                                                                                                                                                                                                                                                                                                                                                                                                                                                                                                                                                                                                                                                                                                                                                                                                                                                                                                                                                                                                                                                                              |
| Complete List of Authors:       | <p>Adjei Nana, David ; University of Ghana, Department of Medical Laboratory Sciences; University of Amsterdam, Department of Public Health</p> <p>Stronks, Karien; Academic Medical Center , Department of Public Health</p> <p>Adu, Dwomoa; Korle-bu Teaching Hospital, Department of Medicine</p> <p>Beune, Erik; AMC</p> <p>Meeks, Karlijn; AMC, Public Health</p> <p>Smeeth, Liam; London School of Hygiene and Tropical Medicine, Addo, Juliet; London School of Hygiene and Tropical Medicine, Non Communicable Disease Epidemiology</p> <p>Owusu-Dabo, Ellis; Kwame Nkrumah University of Science and Technology, Kumasi Centre for Collaborative Research in Tropical Medicine</p> <p>Klipstein-Grobusch, Kerstin; 1 Julius Global Health, Julius Center for Health Sciences and Primary Care, University Medical Centre Utrecht, Utrecht, The Netherlands</p> <p>Mockenhaupt, Frank; Charité – University Medicine, Berlin, Institute of Tropical Medicine and International Health</p> <p>Danquah, Ina; German Institute of Human Nutrition, Molecular Epidemiology; Charite Universitätsmedizin Berlin, Institute for Social Medicine, Epidemiology and Health Economy</p> <p>Spranger, Joachim; Department of Endocrinology and Metabolism, 1. Charité-University Medicine Berlin, Berlin, Germany.</p> <p>Bahendeka, Silver; 1. MKPGMS - Uganda Martyrs University</p> <p>De-Graft Aikins, Ama; University of Ghana, Regional Institute for Population Studies</p> <p>Agyemang, Charles; Academic Medical centre, University of Amsterdam, Department of Public Health</p> |
| <b>Primary Subject Heading</b>: | Epidemiology                                                                                                                                                                                                                                                                                                                                                                                                                                                                                                                                                                                                                                                                                                                                                                                                                                                                                                                                                                                                                                                                                                                                                                                                                                                                                                                                                                                                                                                                                                                                                                             |
| Secondary Subject Heading:      | Public health, Epidemiology                                                                                                                                                                                                                                                                                                                                                                                                                                                                                                                                                                                                                                                                                                                                                                                                                                                                                                                                                                                                                                                                                                                                                                                                                                                                                                                                                                                                                                                                                                                                                              |
| Keywords:                       | Chronic Kidney Disease, Socioeconomic status, Health inequalities, RODAM study, rural, urban                                                                                                                                                                                                                                                                                                                                                                                                                                                                                                                                                                                                                                                                                                                                                                                                                                                                                                                                                                                                                                                                                                                                                                                                                                                                                                                                                                                                                                                                                             |
|                                 |                                                                                                                                                                                                                                                                                                                                                                                                                                                                                                                                                                                                                                                                                                                                                                                                                                                                                                                                                                                                                                                                                                                                                                                                                                                                                                                                                                                                                                                                                                                                                                                          |

1  
2  
3  
4  
5  
6  
7  
8  
9  
10  
11  
12  
13  
14  
15  
16  
17  
18  
19  
20  
21  
22  
23  
24  
25  
26  
27  
28  
29  
30  
31  
32  
33  
34  
35  
36  
37  
38  
39  
40  
41  
42  
43  
44  
45  
46  
47  
48  
49  
50  
51  
52  
53  
54  
55  
56  
57  
58  
59  
60

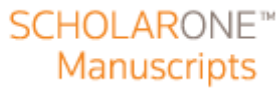

**A CROSS SECTIONAL STUDY OF ASSOCIATION BETWEEN SOCIOECONOMIC INDICATORS AND CHRONIC KIDNEY DISEASE IN RURAL-URBAN GHANA-THE RODAM STUDY**

David N. Adjei, MSc<sup>1,2</sup>; Karien Stronks, MSc, PhD<sup>1</sup>; Dwomoa Adu, MD<sup>3</sup>; Erik Beune, MSc, PhD<sup>1</sup>; Karlijn Meeks, MSc<sup>1</sup>; Liam Smeeth, MD, PhD<sup>4</sup>; Juliet, Addo, MD, PhD<sup>4</sup>; Ellis Owusu-Dabo, MSc, PhD<sup>5</sup>; Kerstin Klipstein-Grobusch, MSc, PhD<sup>6,7</sup>; Frank P. Mockenhaupt, MD, PhD<sup>8</sup>; Ina, Danquah, MSc, PhD<sup>9,10</sup>; Joachim, Spranger, MD, PhD<sup>11,12,13</sup>; Silver Bahendeka, MD, PhD<sup>14</sup>; Ama de-Graft, Aikins, MSc, PhD<sup>15</sup>; Charles Agyemang, MPH, PHD<sup>1</sup>

1. Department of Public Health, Academic Medical Center, University of Amsterdam, Amsterdam Public Health Research Institute, Amsterdam, The Netherlands.
2. Department of Medical Laboratory Sciences, School of Biomedical and Allied Health Sciences, College of Health Sciences, University of Ghana, Accra, Ghana.
3. Department of Medicine, School of Medicine and Dentistry, University of Ghana and Korle-Bu Teaching Hospital, Accra, Ghana.
4. Department of Non-communicable Disease Epidemiology, London School of Hygiene and Tropical Medicine, London, United Kingdom.
5. Kumasi Centre for collaborative Research, KNUST, Kumasi, Ghana
6. Julius Global Health, Julius Center for Health Sciences and Primary Care, University Medical Centre, Utrecht University, The Netherlands
7. Division of Epidemiology & Biostatistics, School of Public Health, Faculty of Health Sciences, University of the Witwatersrand, Johannesburg, South Africa.
8. Institute of Tropical Medicine and International Health, Charité – University Medicine Berlin, Augustenburger Platz 1, 13353 Berlin, Germany.
9. Department of Molecular Epidemiology, German Institute of Human Nutrition Potsdam-Rehbrücke, Nuthetal, Germany.
10. Charité - Universitaetsmedizin Berlin, Institute for Social Medicine, Epidemiology and Health Economics, Berlin, Germany.
11. Department of Endocrinology and Metabolism, Charité-University Medicine Berlin, Berlin, Germany.
12. German Centre for Cardiovascular Research (DZHK), Berlin, Germany.
13. Center for Cardiovascular Research (CCR), Charité-University Medicine Berlin, Berlin, Germany.
14. MKPGMS - Uganda Martyrs University, Kampala, Uganda.
15. Regional Institute for Population Studies, University of Ghana, Legon, Ghana.

Address correspondence to David Nana Adjei, MSc, Department of Public Health, Academic Medical Centre, University of Amsterdam, Meibergdreef 9, 1105 AZ Amsterdam, the Netherlands, School Biomedical and Allied Health Sciences, Medical Laboratory Sciences, University of Ghana, E-mail: [dna@chs.edu.gh](mailto:dna@chs.edu.gh), [d.n.adjei@amc.uva.nl](mailto:d.n.adjei@amc.uva.nl), Tel: +233236717850

## Abstract

**Objectives:** Studies from high income countries suggest higher prevalence of Chronic Kidney Disease (CKD) among individuals in low socio economic groups. However, some studies from low and middle-income countries (LMICs) show the reverse pattern among those in high socioeconomic groups. It is unknown which pattern applies to individuals living in rural and urban Ghana. We therefore assessed the association between Socio-Economic Status (SES) indicators and CKD in rural and urban Ghana and to what extent the higher SES of people in urban areas of Ghana could account for differences in CKD between rural and urban populations.

**Methods:** We used baseline data from multi-centre Research on Obesity and Diabetes among African Migrants (RODAM) study. A sample of 2492 adults (Rural Ghana, 1043, Urban Ghana, 1,449) aged 25 to 70 years living in Ghana. Three CKD outcomes were considered using the 2012 KDIGO (Kidney Disease: Improving Global Outcomes) severity of CKD classification: albuminuria (albumin-creatinine ratio  $\geq 3$  mg/mmol (category  $\geq$  A2)); reduced glomerular filtration rate (eGFR  $< 60$  mL/min/1.73 m<sup>2</sup> (category  $\geq$  G3)) and high to very high CKD risk based on the combination of these two.

**Results:** All three SES indicators were not associated with CKD in both rural and urban Ghana after age and sex adjustment except for rural Ghana where high wealth index was significantly associated with higher odds of reduced eGFR (AOR, 2.38; 95% C.I. 1.03-5.47). The higher rate of CKD observed in urban Ghana was not explained by the higher SES of that population.

**Conclusion:** SES indicators were not associated with prevalence of CKD except for wealth index and reduced eGFR in rural Ghana. Consequently, the higher SES did not account for the increased rate of CKD among urban dwellers suggesting the need to identify other factors that may be driving this.

**Index Words:** Chronic kidney disease; socioeconomic status; health inequalities; risk factor; ethnic minority groups; migrants; RODAM study, Ghana

## Strengths and limitation of the study

- The use of well-standardized study protocols across rural and urban Ghana eliminated intra protocol variability.
- **Our study is also the first in Africa to use all three categories of CKD definition (albuminuria, reduced eGFR and CKD risk) by KDIGO 2012 in assessing association of SES with CKD in rural and urban setting. This provides a more detailed information on CKD outcomes.**
- The limitation of intra laboratory variability in earlier studies was eliminated using the same standard operating procedures in the same laboratory for running all samples for both rural and urban Ghana.
- The use of three constructs of SES (educational level, occupational level and wealth index) in this study also provides a much better holistic approach to assessing SES association with CKD.
- Our study was limited by the use of cross sectional design which prevented us from determining causality between predictors and CKD progression.

1  
2  
3 128  
4 129 **Introduction**

5 130  
6 131 In general, individuals in lower socio-economic status (SES) groups have been shown to suffer more  
7 132 frequently from Chronic Kidney Disease (CKD), often progressing to End Stage Renal Disease (ESRD),  
8 133 and associated with inadequate dialysis treatment, reduced access to kidney transplantation and poor  
9 134 health outcomes<sup>1</sup>. Recent studies have consistently found low SES to be associated with higher risk of  
10 135 CKD among people of African origin<sup>2-5</sup>.

11  
12  
13  
14  
15 136 However, in some settings the well-known inverse association between SES and CKD seems to be absent,  
16 137 or even reversed. For example, Bryne et al. did not find an association between SES and End Stage Renal  
17 138 Disease<sup>6</sup>. Other studies have found a positive association between SES and CKD<sup>7 8</sup>. Specifically, as  
18 139 SES improved, unhealthful lifestyle (unhealthy diet, physical inactivity, smoking and alcohol  
19 140 consumption) increased in China while that of the United States decreased with improved SES<sup>9</sup>. People  
20 141 with higher incomes, in these contexts, can afford a western lifestyle, which is more readily available in  
21 142 the urban areas than in the rural areas. There is therefore an interaction between individual SES and  
22 143 environmental factors, such as food and sedentary life style in such populations<sup>10-12</sup>. Consequently, in  
23 144 those settings, people with a higher SES might have higher CKD risk.

24 145 In urban areas, the population in general has a higher SES than in rural areas<sup>13</sup>. For example, individuals  
25 146 with higher educational level migrate from rural areas to find higher occupations matching their higher  
26 147 education to improve on their wealth. If indeed a positive association between SES and CKD is observed  
27 148 in LMICs, this might underlie the well-known health differences between urban and rural areas, with  
28 149 urban areas having an increased risk of CKD<sup>14</sup>. So far, it is unknown whether the reversed SES gradient  
29 150 (higher risk in high SES group) might explain the higher burden of CKD in urban areas as compared to  
30 151 rural areas in Africa.

31  
32  
33  
34  
35  
36  
37  
38  
39  
40  
41  
42 152  
43 153 In view of this, we assessed the association of SES with CKD in rural and urban Ghana and studied what  
44 154 extent the higher SES of people in urban areas could account for differences in CKD between rural and  
45 155 urban populations.

46  
47  
48  
49 156  
50 157  
51 158  
52 159  
53 160  
54 161  
55  
56  
57  
58  
59  
60



## 162 163 **Methods**

### 164 165 *Study population and study design*

166 In the present analyses, data from the RODAM (**R**esearch on **O**besity & **D**iabetes among **A**African  
167 **M**igrants) study, a multi-centre cross-sectional study were used. The rationale, conceptual framework,  
168 design and methodology of the RODAM study have been described in detail elsewhere<sup>15 16</sup>. As the  
169 Healthy Life in an Urban Setting (HELIUS) study conducted among Ghanaian migrants living  
170 in Amsterdam did not find any associations between SES and CKD<sup>17</sup> the current study focused on  
171 rural and urban Ghana (Ashanti region of Ghana). The RODAM study was conducted from 2012 to 2015  
172 and it comprised of individuals aged 25-70 years living in rural and urban Ghana and Ghanaian migrants  
173 in Europe. All participants below 25 and above 70 years were excluded in the present analyses. The  
174 present analysis was restricted to the rural and urban sites (n=2492) RODAM participants. Specifically,  
175 1043 participants from rural Ghana and 1449 from urban Ghana were used in this study.

176  
177 Data collection for the study was standardized across the sites. Written informed consent was obtained  
178 from each participant prior to enrolment in the study. The respective ethics committees in Ghana and the  
179 three European countries approved the study protocols before data collection began. Specifically, we  
180 obtained ethical clearance in Ghana from (School of Medical Sciences/Komfo Anokye Teaching Hospital  
181 Committee on Human Research, Publication & Ethical Review Board, in the Netherlands, (Institutional  
182 Review Board of the AMC, University of Amsterdam), in Germany, (Ethics Committee of Charite-  
183 Universitätsmedizin) and the UK (London School of Hygiene and Tropical Medicine Research Ethics  
184 Committee) before data collection began in each country.

185  
186 The response rate was 76% in rural Ghana and 74% in urban Ghana. In Ghana, participants were  
187 randomly drawn from a list of 30 enumeration areas in the Ashanti region based on the 2010 population  
188 census using the multistage random sampling. These enumeration areas came from two purposively  
189 selected urban cities (Kumasi and Obuasi) and 15 randomly selected rural communities in the Ashanti  
190 region. Selected health and community authorities were first identified, notified of the study and letters  
191 were sent giving detailed explanation of the study. We sent team members to stay among the communities  
192 to familiarize with them and organize mini clinics in the field. This lasted between 1-2 weeks depending  
193 on the sampled population and responsiveness of respondents.

193  
194 In Ghana, questionnaires administration and physical examination were done at the same day/time. The  
195 participants were instructed to fast from 10.00 pm the night before the physical examination. For the  
current study, 2566 participants with data available on both questionnaire data and physical measurements

1  
2  
3 196 were used. We excluded (n=74) individuals outside the RODAM age range of 25-70 years resulting in a  
4 197 data set of 2492 for analysis. These comprised 1,449 Urban Ghana and 1043 Rural Ghana. For the final  
5 198 analysis, individuals with no data on CKD status (n=42) were excluded.

## 9 199 **Measurements**

## 11 200 **Covariates**

### 13 201 *Demographic and lifestyle factors*

16 202 Information on demographics, educational level, occupational level, wealth index and lifestyle factors  
17 203 (smoking and physical activity) were obtained by questionnaire. Physical examinations were performed  
18 204 with validated devices per standardized operational procedures across all study sites. Weight was  
19 205 measured in light clothing and without shoes with SECA 877 scales to the nearest 0.1 kg. Height was  
20 206 measured without shoes with a portable stadiometer (SECA 217) to the nearest 0.1 cm. Body mass index  
21 207 (BMI) was calculated as weight (kg) divided by height squared (m<sup>2</sup>). Overweight was defined as BMI of  
22 208  $\geq 25$  to  $< 30$  kg/m<sup>2</sup> and obesity as BMI  $\geq 30$  kg/m<sup>2</sup><sup>18</sup>. Per participant all anthropometrics were measured  
23 209 twice by the same assessor and the average of the two measurements were used for analyses.

### 29 210 *Predictor: SES*

32 211 Socioeconomic indicators used in this study were educational level, occupational status and level of  
33 212 wealth index. Educational level was determined based on self-reported highest educational qualification  
34 213 accomplished based on the Ghanaian educational system. Occupational level was determined based on  
35 214 self-reported current occupation if still employed and/or last occupation before retirement or student. The  
36 215 reported occupations were further coded according to the International Standard Classification of  
37 216 Occupations scheme (ISCO-08). Where 'high' (professionals, managers, clerical support staff, higher  
38 217 grade routine non-manual employees service and sales-related occupations) and 'low' (craft and related  
39 218 trades workers, elementary occupations and farmers) and the rest were categorize into the 'middle'.  
40 219 Wealth index was determined using the World Health Organization (WHO) standard of wealth index  
41 220 classification. Wealth index was based on data collected in the Household Questionnaire. The  
42 221 questionnaire comprised of questions on household's ownership of several consumer items such as  
43 222 television, car, flooring material, toilet facilities etc. Each household was assigned a standard score for  
44 223 each asset. Wealth index was then expressed in five categories. The five categories were further  
45 224 categorized into three categories by combining the second and third category due to small numbers<sup>19</sup>. All  
46 225 three SES constructs were further classified as low, medium and high SES and their relationship to each

226 other tested. A composite SES variable (SES) was generated based on the three SES constructs using the  
227 EGEN group command in STATA. This was also categorized into 3 categories (low, medium and high).

### 228 *Co-morbidity factors*

229 Blood pressure (BP) was measured three times using a validated semi-automated device (The Microlife  
230 WatchBP home) with appropriate cuffs in a sitting position after at least 5 min rest. The mean of the last  
231 two BP measurements was used in the analyses. Hypertension was defined as systolic BP  $\geq$  140 mmHg,  
232 and/or diastolic BP  $\geq$  90 mmHg, and/or being on antihypertensive medication treatment, and/or self-  
233 reported hypertension. Trained research assistants in the two sites collected fasting venous blood samples.  
234 All the blood samples were processed and aliquoted immediately (within one hour to maximum three  
235 hours of the vena puncture) after collection per standard operation procedures, and then temporarily  
236 stored at the local research location at  $-20^{\circ}\text{C}$ . The separated samples were then transported to the local  
237 research centres laboratories, where they were checked, registered and stored at  $-80^{\circ}\text{C}$ . To avoid intra-  
238 laboratory variability, the stored blood samples from the local research centres were transported to Berlin,  
239 Germany for biochemical analyses. Fasting plasma glucose concentration was measured using an  
240 enzymatic method (hexokinase). Type 2 diabetes was defined according to the WHO diagnostic criteria  
241 (fasting glucose  $\geq$ 7.0 mmol/L, and/or current use of medication prescribed to treat diabetes, and/or self-  
242 reported diabetes)<sup>20</sup>. Concentration of total cholesterol was assessed using colorimetric test kits. All  
243 biochemical analyses were performed using an ABX Pentra 400 chemistry analyzer (ABX Pentra; Horiba  
244 ABX, Germany). Hypercholesterolemia was defined as total cholesterol level  $\geq$  6.22 mmol/L. Serum  
245 creatinine concentration (in  $\mu\text{mol/L}$ ) was determined by a kinetic colorimetric spectrophotometric isotope  
246 dilution mass spectrometry-calibrated method (Roche Diagnostics). Biochemical analyses were subject to  
247 extensive quality checks including blinded serial measurements.

### 248 **Outcome: CKD prevalence**

249 Participants were asked to bring an early morning urine sample for the analyses of albuminuria and  
250 creatinine levels. Urinary albumin concentration (in mg/L) was measured by an immunochemical  
251 turbidimetric method (Roche Diagnostics). Urinary creatinine concentration (in  $\mu\text{mol/L}$ ) was measured by  
252 a kinetic spectrophotometric method (Roche Diagnostics). Estimated glomerular filtration rate (eGFR)  
253 was calculated using the CKDEPI (CKD Epidemiology Collaboration) creatinine equation<sup>21</sup>. Urinary  
254 albumin-creatinine ratio (ACR; expressed in mg/g) was calculated by taking the ratio between urinary  
255 albumin and urinary creatinine. eGFR and albuminuria were categorized according to the 2012 KDIGO  
256 (Kidney Disease: Improving Global Outcomes) classification<sup>22</sup>. eGFR was categorized as follows: G1,  $\geq$   
257 90 mL/min/1.73 m<sup>2</sup> (normal kidney function); G2, 60 to 89 mL/min/1.73 m<sup>2</sup> (mildly decreased); G3a, 45

1  
2  
3 258 to 59 mL/min/1.73 m<sup>2</sup> (mildly to moderately decreased); G3b, 30 to 44 mL/min/1.73 m<sup>2</sup> (moderately to  
4 259 severely decreased); G4, 15 to 29 mL/min/1.73 m<sup>2</sup> (severely decreased); and G5, < 15 mL/min/1.73 m<sup>2</sup>  
5 260 (kidney failure). Albuminuria categories were derived from ACR and were as follows: A1, < 3mg/mmol  
6 261 (normal to mildly increased); A2, 3 to 30 mg/mmol (moderately increased); and A3, > 30mg/mmol  
7 262 (severely increased). CKD status was categorized according to severity of kidney disease (green, low risk;  
8 263 yellow, moderately increased risk; orange, high risk; and red, very high risk) using the combination of  
9 264 eGFR (G1-G5) and albuminuria (A1-A3) levels defined by the 2012 KDIGO guideline<sup>23</sup>. Due to the  
10 265 small number of participants in the very high risk category of CKD, high and very high risk groups were  
11 266 combined. Reduced eGFR was defined as eGFR < 60 mL/min/1.73 m<sup>2</sup>. Because of the small number of  
12 267 participants in the severely increased albuminuria category, we defined albuminuria as ACR ≥3 mg/mmol  
13 268 by combining the moderately increased (A2) and severely increased (A3) categories.

## 21 269 **Patient and Public Involvement**

22  
23  
24 270 Community leaders were involved in the recruitment of patients. These comprised of religious  
25 271 communities (churches and mosques), endorsement from local key leaders and establishing relationships  
26 272 with healthcare organizations. We also provided information on the study by involving the local media  
27 273 (radio and television stations). We sent letters to all selected health and community authorities to notify  
28 274 participants of the study. Team members were sent to the various community to stay among the  
29 275 community and organize mini clinics for a period of 1-2 weeks. Results of the study were disseminated  
30 276 through seminars, durbars and via radio and television stations.

## 35 277 **Statistical methods**

36  
37  
38 278 Participants' characteristics were expressed as absolute numbers and percentages for categorical variables  
39 279 and as means and standard deviations (SD) for continuous variables. CKD prevalence with 5% error bars  
40 280 were presented as bar graphs for each SES construct across rural and urban Ghana. Spearman's rank  
41 281 correlation was used to determine correlations between the three SES constructs. Odds ratios (ORs) and  
42 282 their corresponding 95% confidence intervals (CIs) were estimated by means of logistic regression  
43 283 analyses to study the odds of albuminuria (ACR>3 mg/mmol, A2-A3, moderately to severely increased  
44 284 albuminuria), reduced kidney function (eGFR< 60 mL/min/1.73 m<sup>2</sup>, G3-G5 moderately to severely  
45 285 decreased kidney function) and increased CKD risk (high and very high CKD risk) by SES, with  
46 286 adjustments for potential covariates (age and sex). These covariates were adjusted for to account for their  
47 287 impact in the pathway of CKD incidence, prevalence and progression<sup>24</sup>. The analyses were performed  
48 288 for the total population (using low educational level, low occupational status and low level of wealth  
49 289 index as reference categories). Further analysis was conducted using rural Ghana as reference. Model 1

290 was adjusted for age and sex while model 2 was adjusted for age, sex and educational level. Model 3 was  
 291 adjusted for age, sex and occupational status while model 4 was adjusted for age, sex and level of wealth  
 292 index. Model 5 was adjusted for age, sex, educational level, occupational level and wealth index ( $p < 0.05$ ).  
 293 Tolerance test and variance inflation factor (VIF) showed very small degree of collinearity among SES  
 294 predictors thus we adjusted for each of SES variables separately. Complete case analysis approach was  
 295 used. All data available were included in the age-adjusted models. All analyses were performed using  
 296 STATA, version 14.0 (StataCorp LP).

## 297 Results

298  
 299 Table 1 shows characteristics of study participants. Participants in rural Ghana were slightly older than  
 300 those in urban Ghana. Female preponderance was observed in both rural and urban Ghana, though higher  
 301 proportions were observed in urban Ghana. Individuals living in rural Ghana were generally less educated  
 302 compared with those living in urban Ghana. There were slightly more individuals with low occupational  
 303 status in urban Ghana compared with their peers in rural Ghana. People in urban Ghana were wealthier  
 304 than their rural counterparts. Rural Ghanaians were more physically active compared with their urban  
 305 peers. Smoking was low among Ghanaians though rural Ghanaians were more likely to smoke compared  
 306 with their urban peers. Hypercholesterolemia was more prevalent in urban Ghana than in rural Ghana.  
 307 Hypertension and type 2 diabetes were more prevalent in urban Ghanaians compared with those living in  
 308 rural Ghana. Urban Ghanaians were markedly more obese compared with their rural peers. Except for  
 309 eGFR, albuminuria and CKD risk prevalence rates were higher in urban Ghana compared with rural  
 310 Ghana.

311 **Table 1: Baseline characteristics by location**

|                               | Rural Ghana | Urban Ghana |
|-------------------------------|-------------|-------------|
| Number of participants, N (%) | 1043 (41.9) | 1449 (58.1) |
| Mean age, years (SD)          | 46.5 (12.6) | 45.2 (11.4) |
| Females, N (%)                | 638 (61.2)  | 1034 (71.4) |
| Educational level n (%)       |             |             |
| Low                           | 555 (56.9)  | 614 (43.9)  |
| Middle                        | 311 (31.9)  | 547 (39.1)  |
| High                          | 108 (11.2)  | 239 (17.0)  |
| Occupational status, n (%)    |             |             |
| Low                           | 250 (25.7)  | 374 (26.7)  |
| Middle                        | 628 (64.5)  | 818 (58.4)  |

1  
2  
3  
4  
5  
6  
7  
8  
9  
10  
11  
12  
13  
14  
15  
16  
17  
18  
19  
20  
21  
22  
23  
24  
25  
26  
27  
28  
29  
30  
31  
32  
33  
34  
35  
36  
37  
38  
39  
40  
41  
42  
43  
44  
45  
46  
47  
48  
49  
50  
51  
52  
53  
54  
55  
56  
57  
58  
59  
60

|                                                           |             |             |
|-----------------------------------------------------------|-------------|-------------|
| High                                                      | 96 (9.8)    | 209 (14.9)  |
| Wealth index, n (%)                                       |             |             |
| Low                                                       | 449 (46.5)  | 368 (26.6)  |
| Middle                                                    | 276 (28.6)  | 416 (30.0)  |
| High                                                      | 241 (24.9)  | 602 (43.4)  |
| BMI (kg/m <sup>2</sup> )                                  |             |             |
| < 25                                                      | 794 (76.3)  | 579 (39.9)  |
| 25-29.9                                                   | 189 (18.2)  | 495 (34.2)  |
| ≥ 30                                                      | 58 (5.5)    | 374 (25.9)  |
| Low physical activity, n (%)                              | 663 (47.22) | 592 (60.7)  |
| Smoking, n (%)                                            | 22 (2.3)    | 14 (1.0)    |
| Hypercholesterolemia, n (%)                               | 78 (7.6)    | 270 (18.7)  |
| Hypertension, n (%)                                       | 306 (29.3)  | 531 (36.7)  |
| Diabetes, n (%)                                           | 53 (5.1)    | 153 (10.6)  |
| Albuminuria, n (%)                                        |             |             |
| A1, Normal to mildly increased (ACR <3 mg/mmol)           | 930 (91.6)  | 1285 (89.1) |
| A2-A3, moderately to severely increased (ACR ≥ 3 mg/mmol) | 85 (8.4)    | 158 (10.9)  |
| eGFR, n (%)                                               |             |             |
| G1-G2 (≥ 60 mL/min/1.73m <sup>2</sup> )                   | 989 (96.3)  | 1388 (96.3) |
| G3-G5 (<60 mL/min/1.73m <sup>2</sup> )                    | 38 (3.7)    | 54 (3.7)    |
| CKD risk, n (%)                                           |             |             |
| Low risk (green)                                          | 916 (90.5)  | 1281 (88.9) |
| Moderately increased to very high risk (yellow to red)    | 96 (9.5)    | 160 (11.1)  |

**Abbreviations:** N, number of respondents; SD, standard deviation; eGFR, estimated glomerular filtration rate; ACR, albumin creatinine ratio; CKD, Chronic kidney disease

Figure 1 shows prevalence of CKD by level of education in urban and rural Ghana. Prevalence of CKD decreased with increasing levels of education in rural Ghana. Higher prevalence of CKD was observed among individuals with low educational level compared with those with middle and high educational level. However, those with high educational level in urban Ghana had higher prevalence of CKD compared with those with middle level education. For occupational status, prevalence of CKD was higher among individuals with low occupational status in urban Ghana. Similar patterns were observed in rural Ghana, however, those with higher occupational status had higher prevalence of CKD compared with those with middle occupational status (Figure 2). Figure 3 shows prevalence of CKD by level of wealth index. CKD prevalence among the levels of wealth index varied between urban and rural Ghana. Those with middle level wealth index had higher prevalence of CKD compared with those with low or high CKD prevalence in both rural and urban Ghana. CKD prevalence rate for low and high level wealth index in urban Ghana was the same while that of rural Ghana was slightly different.

329 Among the whole group, educational level was positively associated with wealth index ( $p<0.01$ ) and composite SES ( $P<0.01$ ). Occupational level  
 330 was also inversely associated with educational level ( $p<0.01$ ) and wealth index ( $p<0.01$ ). In urban Ghana, high educational level was positively  
 331 associated with high wealth index but inversely associated with occupation ( $p<0.01$ ). In rural Ghana, high education was positively associated with  
 332 high wealth index ( $p<0.01$ ), but there was no significant association between education and occupation. High wealth index was inversely  
 333 associated with high occupational status in both rural and urban Ghana ( $p<0.01$ ) (Table 2).

334 **Table 2: Relationship between SES constructs (educational, occupational level and wealth index) by urban rural Ghana**

| Correlation matrix  | Educational level | Occupational level | Wealth index | SES   |
|---------------------|-------------------|--------------------|--------------|-------|
| <b>Whole group</b>  |                   |                    |              |       |
| Educational level   | 1.000             |                    |              |       |
| Occupational status | <b>-0.060</b>     | 1.000              |              |       |
|                     | <b>0.004</b>      |                    |              |       |
| Wealth Index        | 0.282             | <b>-0.121</b>      | 1.000        |       |
|                     | 0.001             | <b>0.001</b>       |              |       |
| SES                 | <b>1.000</b>      | <b>-0.059</b>      | <b>0.282</b> | 1.000 |
|                     | <b>0.003</b>      | <b>0.006</b>       | <b>0.001</b> |       |
| <b>Urban Ghana</b>  |                   |                    |              |       |
| Educational level   | 1.000             |                    |              |       |
| Occupational status | <b>-0.115</b>     | 1.000              |              |       |
|                     | <b>0.001</b>      |                    |              |       |
| Wealth Index        | <b>0.294</b>      | <b>-0.126</b>      | 1.000        |       |

1  
2  
3  
4  
5  
6  
7  
8  
9  
10  
11  
12  
13  
14  
15  
16  
17  
18  
19  
20  
21  
22  
23  
24  
25  
26  
27  
28  
29  
30  
31  
32  
33  
34  
35  
36  
37  
38  
39  
40  
41  
42  
43  
44  
45  
46  
47

|                     |  |              |               |              |       |
|---------------------|--|--------------|---------------|--------------|-------|
|                     |  | <b>0.001</b> | <b>0.001</b>  |              |       |
| SES                 |  | <b>1.000</b> | <b>-0.024</b> | <b>0.937</b> | 1.000 |
|                     |  | <b>0.002</b> | <b>0.001</b>  | <b>0.001</b> |       |
| <b>Rural Ghana</b>  |  |              |               |              |       |
| Educational level   |  | 1.000        |               |              |       |
| Occupational status |  | 0.017        | 1.000         |              |       |
|                     |  | 0.589        |               |              |       |
| Wealth Index        |  | <b>0.219</b> | <b>-0.135</b> | 1.000        |       |
|                     |  | <b>0.001</b> | <b>0.001</b>  |              |       |
| SES                 |  | <b>0.504</b> | 0.017         | <b>0.934</b> | 1.000 |
|                     |  | <b>0.001</b> | 0.587         | <b>0.001</b> |       |

337  
338  
339  
340  
341  
342  
343  
344  
345  
346  
347  
348  
349

For peer review only



Table 3 shows association between level of education, occupational status, level of wealth index and prevalence of CKD. After adjusting for age and sex for the whole group, albuminuria was associated with middle level education ( $p < 0.01$ ). After adjusting for age and sex, we observed no significant association between SES indicators (educational level, occupational status and wealth index) and CKD in urban Ghana. However, middle and higher level education was associated with reduced albuminuria in urban Ghana ( $p < 0.01$ ). Whereas educational level and occupational status were not associated with CKD prevalence, high wealth index was significantly associated with higher odds of reduced eGFR ( $p < 0.01$ ).

**Table 3: Association of SES indicators (educational level, occupational status and wealth index level) with albuminuria, reduced eGFR and CKD risk**

|                            | Albuminuria (ACR $\geq$ 3 mg/mmol) |                         | eGFR < 60 mL/min/1.73 m <sup>2</sup> |                        | High to very high CKD risk (KDIGO, 2012) |                         |
|----------------------------|------------------------------------|-------------------------|--------------------------------------|------------------------|------------------------------------------|-------------------------|
|                            | n (%)                              | OR (95% CI)<br>Model 1  | n (%)                                | OR (95% CI)<br>Model 1 | n cases (%)                              | OR (95% CI)<br>Model 1  |
| <b>Education</b>           |                                    |                         |                                      |                        |                                          |                         |
| <b>Whole group</b>         |                                    |                         |                                      |                        |                                          |                         |
| Low                        | 1,152 (11.89)                      | 1.00 (Reference)        | 1,160 (3.97)                         | 1.00 (Reference)       | 1,150 (11.91)                            | 1.00 (Reference)        |
| Middle                     | 847 (7.32)                         | <b>0.66 (0.48-0.91)</b> | 849 (3.77)                           | 1.36 (0.83-2.22)       | 845 (8.28)                               | 0.82 (0.59-1.12)        |
| High                       | 343 (7.00)                         | 0.67 (0.42-1.07)        | 345 (3.19)                           | 1.11 (0.55-2.29)       | 343 (8.75)                               | 0.96 (0.62-1.49)        |
| <b>Urban Ghana</b>         |                                    |                         |                                      |                        |                                          |                         |
| Low                        | 612 (14.7)                         | 1.00 (Reference)        | 612 (4.1)                            | 1.00 (Reference)       | 612 (14.1)                               | 1.00 (Reference)        |
| Middle                     | 546 (7.8)                          | <b>0.51 (0.34-0.76)</b> | 546 (3.7)                            | 1.12 (0.59-2.12)       | 545 (8.1)                                | <b>0.59 (0.39-0.89)</b> |
| High                       | 238 (8.4)                          | <b>0.53 (0.31-0.91)</b> | 238 (3.4)                            | 0.91 (0.37-2.19)       | 238 (10.9)                               | 0.83 (0.51-1.38)        |
| <b>Rural Ghana</b>         |                                    |                         |                                      |                        |                                          |                         |
| Low                        | 540 (8.7)                          | 1.00 (Reference)        | 548 (3.8)                            | 1.00 (Reference)       | 538 (9.5)                                | 1.00 (Reference)        |
| Middle                     | 301 (6.3)                          | 0.89 (0.51-1.59)        | 303 (3.9)                            | 1.69 (0.77-3.66)       | 300 (8.7)                                | 1.33 (0.79-2.25)        |
| High                       | 105 (3.8)                          | 0.66 (0.23-1.95)        | 107 (2.8)                            | 1.28 (0.35-4.71)       | 105 (3.8)                                | 0.69 (0.23-2.02)        |
| <b>Occupational status</b> |                                    |                         |                                      |                        |                                          |                         |
| <b>Whole group</b>         |                                    |                         |                                      |                        |                                          |                         |
| Low                        | 614 (9.93)                         | 1.00 (Reference)        | 616 (2.76)                           | 1.00 (Reference)       | 613 (9.46)                               | 1.00 (Reference)        |

|    |                     |              |                  |              |                         |              |                  |
|----|---------------------|--------------|------------------|--------------|-------------------------|--------------|------------------|
| 1  |                     |              |                  |              |                         |              |                  |
| 2  |                     |              |                  |              |                         |              |                  |
| 3  | Middle              | 1,427 (9.25) | 0.82 (0.59-1.14) | 1,436 (3.34) | 0.93 (0.52-1.66)        | 1,424 (9.90) | 0.89 (0.65-1.24) |
| 4  | High                | 302 (10.26)  | 0.76 (0.47-1.22) | 303 (7.92)   | 1.33 (0.67-2.62)        | 302 (12.91)  | 0.90 (0.57-1.42) |
| 5  |                     |              |                  |              |                         |              |                  |
| 6  | <b>Urban Ghana</b>  |              |                  |              |                         |              |                  |
| 7  | Low                 | 207 (10.1)   | 1.00 (Reference) | 207 (6.8)    | 1.00 (Reference)        | 207 (12.1)   | 1.00 (Reference) |
| 8  | Middle              | 817 (11.1)   | 1.50 (0.88-2.83) | 817 (3.6)    | 1.15 (0.56-2.35)        | 816 (11.6)   | 1.37 (0.84-2.56) |
| 9  | High                | 373 (11.0)   | 1.57 (0.89-2.53) | 373 (2.7)    | 1.02 (0.41-2.52)        | 373 (9.7)    | 1.21 (0.68-2.14) |
| 10 |                     |              |                  |              |                         |              |                  |
| 11 | <b>Rural Ghana</b>  |              |                  |              |                         |              |                  |
| 12 | Low                 | 95 (10.5)    | 1.00 (Reference) | 96 (10.4)    | 1.00 (Reference)        | 95 (14.7)    | 1.00 (Reference) |
| 13 | Middle              | 610 (6.7)    | 0.65 (0.31-1.37) | 619 (3.1)    | <b>0.37 (0.16-0.85)</b> | 608 (7.6)    | 0.55 (0.28-1.08) |
| 14 | High                | 241 (8.3)    | 0.99 (0.43-2.28) | 243 (2.9)    | 0.51 (0.18-1.44)        | 240 (9.2)    | 0.94 (0.44-2.01) |
| 15 |                     |              |                  |              |                         |              |                  |
| 16 | <b>Wealth index</b> |              |                  |              |                         |              |                  |
| 17 |                     |              |                  |              |                         |              |                  |
| 18 | <b>Whole group</b>  |              |                  |              |                         |              |                  |
| 19 | Low                 | 808 (9.65)   | 1.00 (Reference) | 813 (3.32)   | 1.00 (Reference)        | 808 (9.16)   | 1.00 (Reference) |
| 20 | Middle              | 678 (10.91)  | 1.18 (0.84-1.66) | 683 (3.81)   | 1.30 (0.74-2.28)        | 675 (12.0)   | 1.43 (1.02-2.01) |
| 21 | High                | 835 (8.62)   | 0.93 (0.66-1.31) | 835 (4.19)   | 1.55 (0.91-2.64)        | 833 (9.96)   | 1.21 (0.86-1.69) |
| 22 |                     |              |                  |              |                         |              |                  |
| 23 | <b>Urban Ghana</b>  |              |                  |              |                         |              |                  |
| 24 | Low                 | 367 (11.2)   | 1.00 (Reference) | 367 (3.5)    | 1.00 (Reference)        | 367 (10.1)   | 1.00 (Reference) |
| 25 | Middle              | 414 (12.3)   | 1.12 (0.73-1.74) | 414 (3.9)    | 1.30 (0.61-2.80)        | 413 (13.1)   | 1.45 (0.93-2.27) |
| 26 | High                | 601 (9.8)    | 0.82 (0.55-1.25) | 600 (3.8)    | 1.13 (0.55-2.31)        | 600 (10.8)   | 1.11 (0.72-1.71) |
| 27 |                     |              |                  |              |                         |              |                  |
| 28 | <b>Rural Ghana</b>  |              |                  |              |                         |              |                  |
| 29 | Low                 | 441 (7.9)    | 1.00 (Reference) | 446 (3.1)    | 1.00 (Reference)        | 441 (8.4)    | 1.00 (Reference) |
| 30 | Middle              | 264 (8.7)    | 1.13 (0.65-1.98) | 269 (3.7)    | 1.22 (0.52-2.84)        | 262 (10.3)   | 1.31 (0.77-2.25) |
| 31 | High                | 234 (5.6)    | 0.78 (0.40-1.53) | 235 (5.1)    | <b>2.38 (1.03-5.47)</b> | 233 (7.7)    | 1.16 (0.63-2.14) |
| 32 |                     |              |                  |              |                         |              |                  |

Model 1, adjusted for age and sex; Abbreviations: CI, confidence interval; ACR, albumin creatinine ration; eGFR, estimated glomerular filtration rate; CKD, chronic kidney disease; OR, odds ratio, n= total number of individuals in the whole group, rural and urban Ghana among the various levels of SES constructs; %, proportion of individuals with CKD among the various levels of SES constructs in rural and urban Ghana.

Table 4 shows the contribution of all three SES constructs to rural and urban CKD prevalence differences. The odds of albuminuria and CKD risk was significantly higher in urban Ghana compared with rural Ghana. The higher rate of CKD observed in urban Ghana was not explained by the higher SES of that population as compared to their rural counterparts.

**Table 4: Contribution of SES indicators to rural-urban differences in albuminuria, reduced eGFR and CKD risk**

|                                                      |              | OR (95% CI)<br>Model 1  | OR (95% CI)<br>Model 2  | OR (95% CI)<br>Model 3  | OR (95% CI)<br>Model 4  | OR (95% CI)<br>Model 5  |
|------------------------------------------------------|--------------|-------------------------|-------------------------|-------------------------|-------------------------|-------------------------|
| <b>Albuminuria (ACR <math>\geq</math> 3 mg/mmol)</b> |              |                         |                         |                         |                         |                         |
| Sites                                                | n cases (%)  |                         |                         |                         |                         |                         |
| Urban Ghana                                          | 1,443 (10.9) | <b>1.37 (1.03-1.81)</b> | <b>1.70 (1.25-2.31)</b> | <b>1.55 (1.15-2.10)</b> | <b>1.62 (1.18-2.19)</b> | <b>1.74 (1.27-2.38)</b> |
| Rural Ghana                                          | 1,015 (8.4)  | 1.00 (Reference)        | 1.00 (Reference)        | 1.00 (Reference)        | 1.00 (Reference)        | 1.00 (Reference)        |
| <b>eGFR &lt; 60 mL/min/1.73 m<sup>2</sup></b>        |              |                         |                         |                         |                         |                         |
| Sites                                                | n cases (%)  |                         |                         |                         |                         |                         |
| Urban Ghana                                          | 1,442 (3.7)  | 1.27 (0.82-1.97)        | 1.20 (0.76-1.89)        | 1.18 (0.79-1.86)        | 1.12 (0.70-1.78)        | 1.07 (0.67-1.72)        |
| Rural Ghana                                          | 1,027 (3.7)  | 1.00 (Reference)        | 1.00 (Reference)        | 1.00 (Reference)        | 1.00 (Reference)        | 1.00 (Reference)        |
| <b>High to very high CKD risk</b>                    |              |                         |                         |                         |                         |                         |
| Sites                                                | n cases (%)  |                         |                         |                         |                         |                         |
| Urban Ghana                                          | 1,441 (11.1) | <b>1.23 (1.01-1.62)</b> | <b>1.44 (1.07-1.93)</b> | <b>1.38 (1.03-1.84)</b> | <b>1.36 (1.01-1.83)</b> | <b>1.40 (1.04-1.91)</b> |
| Rural Ghana                                          | 1,012 (9.46) | 1.00 (Reference)        | 1.00 (Reference)        | 1.00 (Reference)        | 1.00 (Reference)        | 1.00 (Reference)        |

Model 1: adjusted for age and sex; Model 2: adjusted for age, sex and education level; Model 3: adjusted for age, sex and occupational status; Model 4: adjusted for age, sex and wealth index; Model 5: adjusted for age, sex, educational level, occupational status and wealth index; Abbreviations: CI, confidence interval; ACR, albumin creatinine ratio; eGFR, estimated glomerular filtration rate; CKD, chronic kidney disease; OR, odds ratio, n=number of participants. n= total number of individuals in rural and urban Ghana; %, proportion of individuals with CKD among urban and rural Ghana.

## 375 **Discussion**

### 376 ***Key findings***

377 Our study findings show no association between all three SES constructs and the prevalence of CKD in  
378 both rural and urban Ghana except for wealth index in rural Ghana, with the risk of CKD being higher in  
379 the wealthier populations. The higher rate of CKD observed in urban Ghana could not be attributed to the  
380 higher SES of that population compared to their rural counterparts.

381

### 382 **Discussion of key findings**

383

#### 384 ***Association of SES with CKD in rural and urban Ghana***

385

386 Our study did not find any significant associations between all three SES constructs and CKD among  
387 rural and urban Ghana except for wealth index in rural Ghana. The positive association observed between  
388 wealth index in rural Ghana may be due to a number of reasons. A comparison of the three SES  
389 constructs showed higher educational level to be associated with wealth index in both rural and urban  
390 Ghana but not occupational level. This seems to suggest that occupational level may not be adequately  
391 capturing the SES status of individuals living in these settings in relation to CKD. For example, Masthi et  
392 al, compared different SES scales in rural and urban India and concluded that Standard of Living Index  
393 (SLI) scale was more accurate for classification of SES in urban and rural setting <sup>25</sup>. Our finding is  
394 consistent with other studies, <sup>6 26</sup> which reported no association between SES and CKD in high-income  
395 countries and LMICs, but in contrast with other studies <sup>2-4 27</sup> that found positive associations between  
396 SES and CKD. The reasons for our current finding are unclear. However, it has been suggested that these  
397 inconsistent associations may be due to the varying pathways through which the effect of SES on health  
398 status is mediated. For example, at a given educational level marked ethnic differences have been  
399 reported. Additionally, similar differences were observed for wealth status at a given income level <sup>28-30</sup>.

400

#### 401 ***Contribution of SES to observed CKD risk differences between rural and urban Ghana***

402

403 We observed higher rates of CKD in urban Ghana compared with rural Ghana, as expected. The observed  
404 higher rates of CKD in our study were not explained by the higher SES of that population as compared to  
405 their rural counterparts. Our results indicate that this is due to the lack of a clear difference in the SES  
406 distribution of rural and urban Ghana observed in this study, as well as to the lack of associations between  
407 SES and CKD. Consistent with our findings, in a study conducted in Northern Tanzania SES did not  
408 explain increased risk of CKD in urban Tanzania <sup>26</sup>. The lack of associations between SES and CKD  
409 could probably partly be explained by the process of epidemiological transition in relation to the

1  
2  
3 410 “diffusion theory” of ischemic heart disease mortality. This theory attributes the commencement of  
4 411 ischemic heart disease to individuals in the high SES group due to their ability to afford behaviours  
5 412 (smoking, alcohol and sedentary lifestyles) which increased risk of ischemic heart disease. The lower SES  
6 413 groups were later affected partially because of improved living standards, imitation and urbanization. The  
7 414 higher SES groups were the first to embrace behavioural changes required to decrease the risk of ischemic  
8 415 heart disease and this resulted in reversing the gradient<sup>31</sup>. The rapid urbanization of some rural  
9 416 communities in the Ashanti region of Ghana and the imitation of urban lifestyle could account for our  
10 417 finding. Also, it could be that whereas the high SES group in urban Ghana has already embraced  
11 418 favourable behavioural changes, those in rural Ghana are yet to do so<sup>32</sup>. This explains the observed  
12 419 association of wealth index with CKD in rural Ghana but not in urban Ghana. The complexities of  
13 420 influence of SES on prevalence and progression of CKD and the differential prevalence of established  
14 421 risk factors (diabetes, obesity and hypertension) in rural and urban Ghana may also contribute to the  
15 422 different associations of SES with CKD prevalence observed in rural and urban Ghana. In our study, the  
16 423 prevalence rates of hypercholesterolemia, hypertension and type 2 diabetes were substantially higher in  
17 424 urban Ghana compared with that of rural Ghana. Also, the interplay of other less understood or researched  
18 425 factors (e.g., exposure to nephrotoxins, herbal medications, sepsis) may be influencing the pathway in  
19 426 which SES influences CKD prevalence and progression.

### 427 428 ***Strength and limitation***

429  
430 Our study presents several strengths. First, we used well-standardized study protocols across rural and  
431 urban Ghana. Our study is also the first in Africa to use all three categories of CKD definition  
432 (albuminuria, reduced eGFR and CKD risk) by KDIGO 2012 in assessing association of SES with CKD  
433 in rural and urban setting, this provides a more detailed information on CKD outcomes. The limitation of  
434 intra laboratory variability in earlier studies was eliminated using the same standard operating procedures  
435 in the same laboratory for running all samples for both rural and urban Ghana. The use of three constructs  
436 of SES in this study also provides a much better holistic approach to assessing SES. Also, the distribution  
437 of SES in our study reflect on the national data allowing for generalization of our findings. Our study was  
438 limited by the use of cross sectional design, which prevented us from determining causality between  
439 predictors and CKD progression. Furthermore, there were more women than men in our study due to the  
440 higher response rate in women compared with men. However, this applied to both rural and urban Ghana.  
441 We therefore do not expect this to influence our results in a significant way.

### 442 443 444 ***Conclusion***

445

1  
2  
3 446 All three SES constructs appear not to be associated with prevalence of CKD in urban and rural Ghana  
4 447 except for wealth index in rural Ghana. The observed higher prevalence of CKD in urban Ghana was not  
5 448 explained by the higher SES in urban Ghana. Our study seems to suggest that other non-traditional factors  
6 449 such as nephrotoxins, herbal medications and misuse of over the counter drugs may play a role and  
7 450 underscores the need to further explore these factors.  
8  
9  
10

11 451  
12  
13 452 **Acknowledgement**  
14 453 The authors are very grateful to the research assistants, interviewers and other staff of the five research  
15 454 locations who took part in gathering the data and the Ghanaian volunteers in all the participating RODAM  
16 455 sites. We gratefully acknowledge the advisory board members for their valuable support in shaping the  
17 456 RODAM study methods and the Academic Medical Centre Biobank for their support in biobank  
18 457 management and high-quality storage of collected samples.  
19  
20  
21  
22 458

23  
24 459  
25 460 **Contributors**  
26 461 My co-authors have all contributed substantially to this manuscript and approve of this  
27 462 submission. Research idea and study design: DNA, CA, KS, DA, EB, KM, JA; data acquisition  
28 463 and curation: DNA, CA, EB, KM, data analysis/interpretation: DNA, CA, KS, DA, EB, KM, LS,  
29 464 JA, EOD, KKB, FPM, ID, JS, SB, ADA; statistical analysis: DNA, CA, KS. DNA, CA, KS, DA,  
30 465 EB, KM, LS, JA, EOD, KKB, FPM, ID, JS, SB, ADA contributed important intellectual content  
31 466 during manuscript drafting or revision and accepts accountability for the overall work by  
32 467 ensuring that questions pertaining to the accuracy or integrity of any portion of the work are  
33 468 appropriately investigated and resolved. DNA and CA takes responsibility that this study has  
34 469 been reported honestly, accurately, and transparently; that no important aspects of the study have  
35 470 been omitted; and that any discrepancies from the study as planned have been explained.  
36  
37  
38  
39  
40  
41  
42  
43

44 471  
45 472 **Funding**  
46 473  
47 474 This work was supported by the European Commission under the Framework Programme (Grant  
48 475 Number: 278901). The funders had no role in study design, data collection and analysis, decision to  
49 476 publish, or preparation of the manuscript. The Wellcome Trust supported Professor Smeeth's  
50 477 contribution, grant number WT082178. Professor Joachim Spranger was supported by the DZHK  
51 478 (German Center for cardiovascular research) and the Berlin Institute of Health (BIH).  
52  
53  
54  
55  
56  
57  
58  
59  
60

1  
2  
3 479 **Competing interest:** I have communicated with all my co-authors and obtained their full  
4 480 disclosures. My co-authors and I declare no conflicts of interest.  
5 481

6  
7 482 **Patient Consent:** None declared  
8 483

9 484 **Ethics approval:** IRBs at each participating site.  
10 485

11 486 **Data sharing statement:** Data are available from the RODAM research cohort, a third party. Dr.  
12 487 Eric Beune affiliated with the RODAM research cohort and a co-author of this paper in  
13 488 accordance with the RODAM requirements for collaboration. Dr. Beune is the Data Collection  
14 489 Coordinator of RODAM and may be contacted with further questions (e.j.beune@amc.uva.nl).  
15 490 Additionally, researchers interested in further collaboration with RODAM may see the following  
16 491 URL: <http://www.rod-am.eu/>  
17 492  
18 493  
19 494  
20 495  
21 496  
22 497  
23 498  
24 499  
25 500  
26 501  
27 502  
28 503  
29 504  
30 505  
31 506  
32 507  
33 508  
34 509  
35 510  
36 511  
37 512  
38 513  
39 514  
40 515  
41 516  
42 517  
43 518  
44 519  
45 520  
46 521

## References

1. Patzer RE, McClellan WM. Influence of race, ethnicity and socioeconomic status on kidney disease. *Nature Reviews Nephrology* 2012;8(9):533-41.
2. Merkin SS, Roux AVD, Coresh J, et al. Individual and neighborhood socioeconomic status and progressive chronic kidney disease in an elderly population: The Cardiovascular Health Study. *Soc Sci Med* 2007;65(4):809-21.
3. Bello AK, Peters J, Rigby J, et al. Socioeconomic status and chronic kidney disease at presentation to a renal service in the United Kingdom. *Clin J Am Soc Nephrol* 2008;3(5):1316-23.
4. Crews DC, Charles RF, Evans MK, et al. Poverty, race, and CKD in a racially and socioeconomically diverse urban population. *Am J Kidney Dis* 2010;55(6):992-1000.
5. Shoham DA, Vupputuri S, Roux AVD, et al. Kidney disease in life-course socioeconomic context: the Atherosclerosis Risk in Communities (ARIC) Study. *Am J Kidney Dis* 2007;49(2):217-26.
6. Byrne C, Nedelman J, Luke RG. Race, socioeconomic status, and the development of end-stage renal disease. *Am J Kidney Dis* 1994;23(1):16-22.
7. Popkin BM. The shift in stages of the nutrition transition in the developing world differs from past experiences! *Public Health Nutr* 2002;5(1A):205-14.
8. Du S, Lu B, Zhai F, et al. A new stage of the nutrition transition in China. *Public Health Nutr* 2002;5(1a):169-74.
9. Kim S, Symons M, Popkin BM. Contrasting socioeconomic profiles related to healthier lifestyles in China and the United States. *Am J Epidemiol* 2004;159(2):184-91.
10. Adler NE, Ostrove JM. Socioeconomic status and health: what we know and what we don't. *Ann N Y Acad Sci* 1999;896(1):3-15.
11. Anderson NB, Armstead CA. Toward understanding the association of socioeconomic status and health: A new challenge for the biopsychosocial approach. *Psychosom Med* 1995;57(3):213-25.
12. Feinstein JS. The relationship between socioeconomic status and health: a review of the literature. *The Milbank Quarterly* 1993:279-322.
13. Samuel P, Antonisamy B, Raghupathy P, et al. Socio-economic status and cardiovascular risk factors in rural and urban areas of Vellore, Tamilnadu, South India. *Int J Epidemiol* 2012;41(5):1315-27.
14. Christie S, Fone DL. Does car ownership reflect socio-economic disadvantage in rural areas? A cross-sectional geographical study in Wales, UK. *Public Health* 2003;117(2):112-16.
15. Agyemang C, Beune E, Meeks K, et al. Rationale and cross-sectional study design of the Research on Obesity and type 2 Diabetes among African Migrants: the RODAM study. *BMJ open* 2015;4(3):e004877.
16. Addo J, Agyemang C, Aikins Ad-G, et al. Association between socioeconomic position and the prevalence of type 2 diabetes in Ghanaians in different geographic locations: the RODAM study. *J Epidemiol Community Health* 2017;jech-2016-208322.
17. Adjei DN, Stronks K, Adu D, et al. Relationship between educational and occupational levels, and Chronic Kidney Disease in a multi-ethnic sample-The HELIUS study. *PLoS One* 2017;12(11):e0186460.
18. Consultation WE. Waist circumference and waist-hip ratio. *Report of a WHO Expert Consultation Geneva: World Health Organization* 2008:8-11.
19. Rutstein SO, Johnson K, MEASURE OM. The DHS wealth index: ORC Macro, MEASURE DHS 2004.



- 1  
2  
3 568 20. Association AD. Standards of medical care in diabetes—2014. *Diabetes Care*  
4 569 2014;37(Supplement 1):S14-S80.
- 5 570 21. Stevens LA, Schmid CH, Greene T, et al. Comparative performance of the CKD  
6 571 epidemiology collaboration (CKD-EPI) and the modification of diet in renal disease  
7 572 (MDRD) study equations for estimating GFR levels above 60 mL/min/1.73 m<sup>2</sup>. *Am J*  
8 573 *Kidney Dis* 2010;56(3):486-95.
- 9 574 22. Eknoyan G, Lameire N, Eckardt K, et al. KDIGO 2012 clinical practice guideline for the  
10 575 evaluation and management of chronic kidney disease. *Kidney Int* 2013;3:5-14.
- 11 576 23. KDIGO G. Work Group. KDIGO clinical practice guideline for glomerulonephritis. *Kidney*  
12 577 *inter, Suppl* 2012;2:139-274.
- 13 578 24. Collins AJ, Foley RN, Herzog C, et al. US Renal Data System 2010 Annual Data Report.  
14 579 *American journal of kidney diseases: the official journal of the National Kidney*  
15 580 *Foundation* 2011;57(1 Suppl 1):A8, e1.
- 16 581 25. Masthi NR, Gangaboraiah PK. An exploratory study on socio economic status scales in a  
17 582 rural and urban setting. *Journal of family medicine and primary care* 2013;2(1):69.
- 18 583 26. Stanifer JW, Maro V, Egger J, et al. The epidemiology of chronic kidney disease in Northern  
19 584 Tanzania: a population-based survey. *PLoS One* 2015;10(4):e0124506.
- 20 585 27. Bruce MA, Beech BM, Crook ED, et al. Association of socioeconomic status and CKD  
21 586 among African Americans: the Jackson Heart Study. *Am J Kidney Dis* 2010;55(6):1001-  
22 587 08.
- 23 588 28. Braveman PA, Cubbin C, Egerter S, et al. Socioeconomic status in health research: one size  
24 589 does not fit all. *JAMA* 2005;294(22):2879-88.
- 25 590 29. Gilthorpe MS, Wilson RC. Rural/urban differences in the association between deprivation  
26 591 and healthcare utilisation. *Soc Sci Med* 2003;57(11):2055-63.
- 27 592 30. Choi AI, Weekley CC, Chen S-C, et al. Association of educational attainment with chronic  
28 593 disease and mortality: the Kidney Early Evaluation Program (KEEP). *Am J Kidney Dis*  
29 594 2011;58(2):228-34.
- 30 595 31. Mackenbach JP, Cavelaars A, Kunst AE, et al. Socioeconomic inequalities in cardiovascular  
31 596 disease mortality. An international study. *Eur Heart J* 2000;21(14):1141-51.
- 32 597 32. McKay L, Macintyre S, Ellaway A. Migration and health: a review of the international  
33 598 literature. MRC Social and Public Health Sciences Unit, Occasional Paper No. 12.  
34 599 *Glasgow: Medical Research Council[Links]* 2003

### Legend for figures

Figure 1: Prevalence of chronic kidney disease (CKD) across level of education among urban and rural participants Definitions according to 2012 KDIGO (Kidney Disease: Improving Global

1  
2  
3 613 Outcomes) guideline. CKD was defined as being in moderately increased risk, high-risk, or very  
4 614 high-risk groups.  
5 615  
6 616

8 617 Figure 2: Prevalence of chronic kidney disease (CKD) across occupational status among urban  
9 618 and rural participants. Definitions according to 2012 KDIGO (Kidney Disease: Improving  
10 619 Global Outcomes) guideline. CKD was defined as being in moderately increased risk, high-risk,  
11 620 or very high-risk groups.  
12 621  
13 622  
14 623

16 624 Figure 3: Prevalence of chronic kidney disease (CKD) across wealth index categories among  
17 625 urban and rural participants. Definitions according to 2012 KDIGO (Kidney Disease: Improving  
18 626 Global Outcomes) guideline. CKD was defined as being in moderately increased risk, high-risk,  
19 627 or very high-risk groups.  
20 628  
21 629  
22 630  
23 631  
24 632  
25 633

1  
2  
3  
4  
5  
6  
7  
8  
9  
10  
11  
12  
13  
14  
15  
16  
17  
18  
19  
20  
21  
22  
23  
24  
25  
26  
27  
28  
29  
30  
31  
32  
33  
34  
35  
36  
37  
38  
39  
40  
41  
42  
43  
44  
45  
46  
47  
48  
49  
50  
51  
52  
53  
54  
55  
56  
57  
58  
59  
60

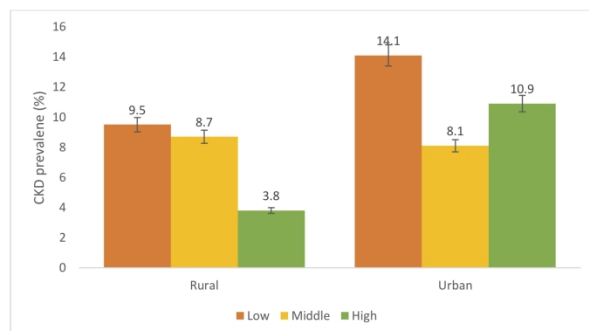

Figure 1: Prevalence of chronic kidney disease (CKD) across level of education among urban and rural participants Definitions according to 2012 KDIGO (Kidney Disease: Improving Global Outcomes) guideline. CKD was defined as being in moderately increased risk, high-risk, or very high-risk groups

Figure 1: Prevalence of chronic kidney disease (CKD) across level of education among urban and rural participants Definitions according to 2012 KDIGO (Kidney Disease: Improving Global Outcomes) guideline. CKD was defined as being in moderately increased risk, high-risk, or very high-risk groups.

279x361mm (300 x 300 DPI)

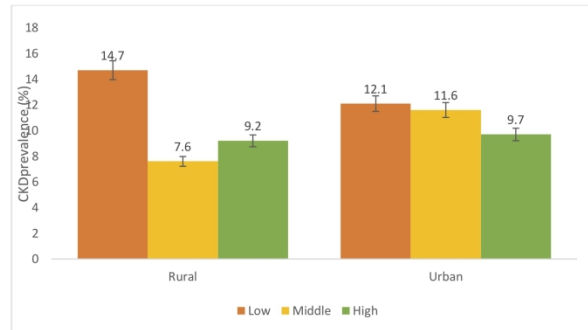

Figure 2: Prevalence of chronic kidney disease (CKD) across occupational status among urban and rural participants. Definitions according to 2012 KDIGO (Kidney Disease: Improving Global Outcomes) guideline. CKD was defined as being in moderately increased risk, high-risk, or very high-risk groups

Figure 2: Prevalence of chronic kidney disease (CKD) across occupational status among urban and rural participants. Definitions according to 2012 KDIGO (Kidney Disease: Improving Global Outcomes) guideline. CKD was defined as being in moderately increased risk, high-risk, or very high-risk groups.

279x361mm (300 x 300 DPI)

1  
2  
3  
4  
5  
6  
7  
8  
9  
10  
11  
12  
13  
14  
15  
16  
17  
18  
19  
20  
21  
22  
23  
24  
25  
26  
27  
28  
29  
30  
31  
32  
33  
34  
35  
36  
37  
38  
39  
40  
41  
42  
43  
44  
45  
46  
47  
48  
49  
50  
51  
52  
53  
54  
55  
56  
57  
58  
59  
60

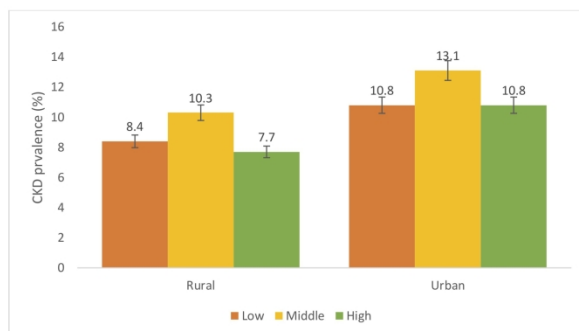

Figure 3: Prevalence of chronic kidney disease (CKD) across wealth index categories among urban and rural participants. Definitions according to 2012 KDIGO (Kidney Disease: Improving Global Outcomes) guideline. CKD was defined as being in moderately increased risk, high-risk, or very high-risk groups

Figure 3: Prevalence of chronic kidney disease (CKD) across wealth index categories among urban and rural participants. Definitions according to 2012 KDIGO (Kidney Disease: Improving Global Outcomes) guideline. CKD was defined as being in moderately increased risk, high-risk, or very high-risk groups.

279x361mm (300 x 300 DPI)

## STROBE Statement—checklist of items that should be included in reports of observational studies

|                           | Item No. | Recommendation                                                                                                                  | Page No. | Relevant text from manuscript                                                                                                                                                                                                                                                                                                                                                             |
|---------------------------|----------|---------------------------------------------------------------------------------------------------------------------------------|----------|-------------------------------------------------------------------------------------------------------------------------------------------------------------------------------------------------------------------------------------------------------------------------------------------------------------------------------------------------------------------------------------------|
| <b>Title and abstract</b> | 1        | (a) Indicate the study's design with a commonly used term in the title or the abstract                                          | 1,2      | We have included a commonly used term in the title and abstract                                                                                                                                                                                                                                                                                                                           |
|                           |          | (b) Provide in the abstract an informative and balanced summary of what was done and what was found                             | 2        | Our study did not find any associations between SES indicators and CKD in both rural and urban Ghana after age and sex adjustment except in rural Ghana where wealth index was associated with prevalence of CKD. Consequently, the higher SES did not account for the increased rate of CKD among urban dwellers suggesting the need to identify other factors that may be driving this. |
| <b>Introduction</b>       |          |                                                                                                                                 |          |                                                                                                                                                                                                                                                                                                                                                                                           |
| Background/rationale      | 2        | Explain the scientific background and rationale for the investigation being reported                                            | 4        | The theoretical and scientific background as well as the rationale for conducting the study have been provided in the introduction section.                                                                                                                                                                                                                                               |
| Objectives                | 3        | State specific objectives, including any prespecified hypotheses                                                                | 4        | We assessed the association of SES with CKD in rural and urban Ghana and studied what extent the higher SES of people in urban areas could account for differences in CKD between rural and urban populations                                                                                                                                                                             |
| <b>Methods</b>            |          |                                                                                                                                 |          |                                                                                                                                                                                                                                                                                                                                                                                           |
| Study design              | 4        | Present key elements of study design early in the paper                                                                         | 5-6      | Details given in the methods                                                                                                                                                                                                                                                                                                                                                              |
| Setting                   | 5        | Describe the setting, locations, and relevant dates, including periods of recruitment, exposure, follow-up, and data collection | 5-6      | Rural or urban Ghana.                                                                                                                                                                                                                                                                                                                                                                     |

|                              |    |                                                                                                                                                                                                                                                                                                                                                                                                                                                                                    |     |                                                                                                                                       |
|------------------------------|----|------------------------------------------------------------------------------------------------------------------------------------------------------------------------------------------------------------------------------------------------------------------------------------------------------------------------------------------------------------------------------------------------------------------------------------------------------------------------------------|-----|---------------------------------------------------------------------------------------------------------------------------------------|
| Participants                 | 6  | <p>(a) <i>Cohort study</i>—Give the eligibility criteria, and the sources and methods of selection of participants. Describe methods of follow-up</p> <p><i>Case-control study</i>—Give the eligibility criteria, and the sources and methods of case ascertainment and control selection. Give the rationale for the choice of cases and controls</p> <p><i>Cross-sectional study</i>—Give the eligibility criteria, and the sources and methods of selection of participants</p> | 6-8 | A multi-centre cross-sectional study was conducted among Ghanaian adults (n=2492) aged 25-70 years residing in rural and urban Ghana. |
|                              |    | <p>(b) <i>Cohort study</i>—For matched studies, give matching criteria and number of exposed and unexposed</p> <p><i>Case-control study</i>—For matched studies, give matching criteria and the number of controls per case</p>                                                                                                                                                                                                                                                    |     |                                                                                                                                       |
| Variables                    | 7  | Clearly define all outcomes, exposures, predictors, potential confounders, and effect modifiers. Give diagnostic criteria, if applicable                                                                                                                                                                                                                                                                                                                                           | 6-8 | The main outcomes have been clearly defined.                                                                                          |
| Data sources/<br>measurement | 8* | For each variable of interest, give sources of data and details of methods of assessment (measurement). Describe comparability of assessment methods if there is more than one group                                                                                                                                                                                                                                                                                               | 6-8 | We defined each variable of interest in the methods accordingly                                                                       |
| Bias                         | 9  | Describe any efforts to address potential sources of bias                                                                                                                                                                                                                                                                                                                                                                                                                          | 18  | Potential sources of bias have discussed in the discussion section                                                                    |
| Study size                   | 10 | Explain how the study size was arrived at                                                                                                                                                                                                                                                                                                                                                                                                                                          | 5   | Given in the methods section and we have also referred to the RODAM study methods paper                                               |

Continued on next page

|                        |     |                                                                                                                                                                                                              |       |                                                                                              |
|------------------------|-----|--------------------------------------------------------------------------------------------------------------------------------------------------------------------------------------------------------------|-------|----------------------------------------------------------------------------------------------|
| Quantitative variables | 11  | Explain how quantitative variables were handled in the analyses. If applicable, describe which groupings were chosen and why                                                                                 | 8-9   | Please see methods                                                                           |
| Statistical methods    | 12  | (a) Describe all statistical methods, including those used to control for confounding                                                                                                                        | 8-9   | Please see methods                                                                           |
|                        |     | (b) Describe any methods used to examine subgroups and interactions                                                                                                                                          | 8-9   | Please see methods                                                                           |
|                        |     | (c) Explain how missing data were addressed                                                                                                                                                                  | 8-9   |                                                                                              |
|                        |     | (d) <i>Cohort study</i> —If applicable, explain how loss to follow-up was addressed                                                                                                                          | NA    | We have reported non-response across sites                                                   |
|                        |     | (e) <i>Case-control study</i> —If applicable, explain how matching of cases and controls was addressed                                                                                                       |       |                                                                                              |
|                        |     | <i>Cross-sectional study</i> —If applicable, describe analytical methods taking account of sampling strategy                                                                                                 |       |                                                                                              |
|                        |     | (e) Describe any sensitivity analyses                                                                                                                                                                        | NA    |                                                                                              |
| <b>Results</b>         |     |                                                                                                                                                                                                              |       |                                                                                              |
| Participants           | 13* | (a) Report numbers of individuals at each stage of study—eg numbers potentially eligible, examined for eligibility, confirmed eligible, included in the study, completing follow-up, and analysed            | 5     | Non-response analysis was done to shed light on the differential response rates across sites |
|                        |     | (b) Give reasons for non-participation at each stage                                                                                                                                                         | 5     |                                                                                              |
|                        |     | (c) Consider use of a flow diagram                                                                                                                                                                           | 5     | We have also referred to RODAM methods paper                                                 |
| Descriptive data       | 14* | (a) Give characteristics of study participants (eg demographic, clinical, social) and information on exposures and potential confounders                                                                     | 5     | We have also referred to RODAM methods paper                                                 |
|                        |     | (b) Indicate number of participants with missing data for each variable of interest                                                                                                                          | 5     | We have also referred to RODAM methods paper                                                 |
|                        |     | (c) <i>Cohort study</i> —Summarise follow-up time (eg, average and total amount)                                                                                                                             | NA    |                                                                                              |
| Outcome data           | 15* | <i>Cohort study</i> —Report numbers of outcome events or summary measures over time                                                                                                                          | NA    |                                                                                              |
|                        |     | <i>Case-control study</i> —Report numbers in each exposure category, or summary measures of exposure                                                                                                         | NA    |                                                                                              |
|                        |     | <i>Cross-sectional study</i> —Report numbers of outcome events or summary measures                                                                                                                           | 9-10  | Summary measures are given in the results section and in tables and figures                  |
| Main results           | 16  | (a) Give unadjusted estimates and, if applicable, confounder-adjusted estimates and their precision (eg, 95% confidence interval). Make clear which confounders were adjusted for and why they were included | 12-16 | Unadjusted and adjusted estimates are given in the results section and in figures            |
|                        |     | (b) Report category boundaries when continuous variables were categorized                                                                                                                                    | 12-16 | We have provided mean and corresponding standard deviations for the continuous variables.    |



|                          |    |                                                                                                                                                                            |       |                                                                                                                                                  |
|--------------------------|----|----------------------------------------------------------------------------------------------------------------------------------------------------------------------------|-------|--------------------------------------------------------------------------------------------------------------------------------------------------|
|                          |    | (c) If relevant, consider translating estimates of relative risk into absolute risk for a meaningful time                                                                  | NA    |                                                                                                                                                  |
|                          |    | Continued on next page                                                                                                                                                     |       |                                                                                                                                                  |
| Other analyses           | 17 | Report other analyses done—eg analyses of subgroups and interactions, and sensitivity analyses                                                                             | NA    |                                                                                                                                                  |
| <b>Discussion</b>        |    |                                                                                                                                                                            |       |                                                                                                                                                  |
| Key results              | 18 | Summarise key results with reference to study objectives                                                                                                                   | 8     |                                                                                                                                                  |
| Limitations              | 19 | Discuss limitations of the study, taking into account sources of potential bias or imprecision. Discuss both direction and magnitude of any potential bias                 | 18    | Key limitations regarding study methods including differential response rates and sampling methods in the various study sites have been provided |
| Interpretation           | 20 | Give a cautious overall interpretation of results considering objectives, limitations, multiplicity of analyses, results from similar studies, and other relevant evidence | 17-18 | Cautious overall interpretation of the key findings have been provided.                                                                          |
| Generalisability         | 21 | Discuss the generalisability (external validity) of the study results                                                                                                      | 17-18 |                                                                                                                                                  |
| <b>Other information</b> |    |                                                                                                                                                                            |       |                                                                                                                                                  |
| Funding                  | 22 | Give the source of funding and the role of the funders for the present study and, if applicable, for the original study on which the present article is based              | 19    | The funders had no role in study design, data collection and analysis, decision to publish, or preparation of the manuscript                     |

\*Give information separately for cases and controls in case-control studies and, if applicable, for exposed and unexposed groups in cohort and cross-sectional studies.

**Note:** An Explanation and Elaboration article discusses each checklist item and gives methodological background and published examples of transparent reporting. The STROBE checklist is best used in conjunction with this article (freely available on the Web sites of PLoS Medicine at <http://www.plosmedicine.org/>, Annals of Internal Medicine at <http://www.annals.org/>, and Epidemiology at <http://www.epidem.com/>). Information on the STROBE Initiative is available at [www.strobe-statement.org](http://www.strobe-statement.org).

# BMJ Open

## A CROSS-SECTIONAL STUDY OF ASSOCIATION BETWEEN SOCIOECONOMIC INDICATORS AND CHRONIC KIDNEY DISEASE IN RURAL-URBAN GHANA-THE RODAM STUDY

|                                 |                                                                                                                                                                                                                                                                                                                                                                                                                                                                                                                                                                                                                                                                                                                                                                                                                                                                                                                                                                                                                                                                                                                                                                                                                                                                                                                                                                                                                                                                                                                                                                                          |
|---------------------------------|------------------------------------------------------------------------------------------------------------------------------------------------------------------------------------------------------------------------------------------------------------------------------------------------------------------------------------------------------------------------------------------------------------------------------------------------------------------------------------------------------------------------------------------------------------------------------------------------------------------------------------------------------------------------------------------------------------------------------------------------------------------------------------------------------------------------------------------------------------------------------------------------------------------------------------------------------------------------------------------------------------------------------------------------------------------------------------------------------------------------------------------------------------------------------------------------------------------------------------------------------------------------------------------------------------------------------------------------------------------------------------------------------------------------------------------------------------------------------------------------------------------------------------------------------------------------------------------|
| Journal:                        | <i>BMJ Open</i>                                                                                                                                                                                                                                                                                                                                                                                                                                                                                                                                                                                                                                                                                                                                                                                                                                                                                                                                                                                                                                                                                                                                                                                                                                                                                                                                                                                                                                                                                                                                                                          |
| Manuscript ID                   | bmjopen-2018-022610.R2                                                                                                                                                                                                                                                                                                                                                                                                                                                                                                                                                                                                                                                                                                                                                                                                                                                                                                                                                                                                                                                                                                                                                                                                                                                                                                                                                                                                                                                                                                                                                                   |
| Article Type:                   | Research                                                                                                                                                                                                                                                                                                                                                                                                                                                                                                                                                                                                                                                                                                                                                                                                                                                                                                                                                                                                                                                                                                                                                                                                                                                                                                                                                                                                                                                                                                                                                                                 |
| Date Submitted by the Author:   | 05-Nov-2018                                                                                                                                                                                                                                                                                                                                                                                                                                                                                                                                                                                                                                                                                                                                                                                                                                                                                                                                                                                                                                                                                                                                                                                                                                                                                                                                                                                                                                                                                                                                                                              |
| Complete List of Authors:       | <p>Adjei Nana, David ; University of Ghana, Department of Medical Laboratory Sciences; University of Amsterdam, Department of Public Health</p> <p>Stronks, Karien; Academic Medical Center , Department of Public Health</p> <p>Adu, Dwomoa; Korle-bu Teaching Hospital, Department of Medicine</p> <p>Beune, Erik; AMC</p> <p>Meeks, Karlijn; AMC, Public Health</p> <p>Smeeth, Liam; London School of Hygiene and Tropical Medicine, Addo, Juliet; London School of Hygiene and Tropical Medicine, Non Communicable Disease Epidemiology</p> <p>Owusu-Dabo, Ellis; Kwame Nkrumah University of Science and Technology, Kumasi Centre for Collaborative Research in Tropical Medicine</p> <p>Klipstein-Grobusch, Kerstin; 1 Julius Global Health, Julius Center for Health Sciences and Primary Care, University Medical Centre Utrecht, Utrecht, The Netherlands</p> <p>Mockenhaupt, Frank; Charité – University Medicine, Berlin, Institute of Tropical Medicine and International Health</p> <p>Danquah, Ina; German Institute of Human Nutrition, Molecular Epidemiology; Charite Universitätsmedizin Berlin, Institute for Social Medicine, Epidemiology and Health Economy</p> <p>Spranger, Joachim; Department of Endocrinology and Metabolism, 1. Charité-University Medicine Berlin, Berlin, Germany.</p> <p>Bahendeka, Silver; 1. MKPGMS - Uganda Martyrs University</p> <p>De-Graft Aikins, Ama; University of Ghana, Regional Institute for Population Studies</p> <p>Agyemang, Charles; Academic Medical centre, University of Amsterdam, Department of Public Health</p> |
| <b>Primary Subject Heading</b>: | Epidemiology                                                                                                                                                                                                                                                                                                                                                                                                                                                                                                                                                                                                                                                                                                                                                                                                                                                                                                                                                                                                                                                                                                                                                                                                                                                                                                                                                                                                                                                                                                                                                                             |
| Secondary Subject Heading:      | Public health, Epidemiology                                                                                                                                                                                                                                                                                                                                                                                                                                                                                                                                                                                                                                                                                                                                                                                                                                                                                                                                                                                                                                                                                                                                                                                                                                                                                                                                                                                                                                                                                                                                                              |
| Keywords:                       | Chronic Kidney Disease, Socioeconomic status, Health inequalities, RODAM study, rural, urban                                                                                                                                                                                                                                                                                                                                                                                                                                                                                                                                                                                                                                                                                                                                                                                                                                                                                                                                                                                                                                                                                                                                                                                                                                                                                                                                                                                                                                                                                             |
|                                 |                                                                                                                                                                                                                                                                                                                                                                                                                                                                                                                                                                                                                                                                                                                                                                                                                                                                                                                                                                                                                                                                                                                                                                                                                                                                                                                                                                                                                                                                                                                                                                                          |

1  
2  
3  
4  
5  
6  
7  
8  
9  
10  
11  
12  
13  
14  
15  
16  
17  
18  
19  
20  
21  
22  
23  
24  
25  
26  
27  
28  
29  
30  
31  
32  
33  
34  
35  
36  
37  
38  
39  
40  
41  
42  
43  
44  
45  
46  
47  
48  
49  
50  
51  
52  
53  
54  
55  
56  
57  
58  
59  
60



**A CROSS SECTIONAL STUDY OF ASSOCIATION BETWEEN  
SOCIOECONOMIC INDICATORS AND CHRONIC KIDNEY DISEASE IN  
RURAL-URBAN GHANA-THE RODAM STUDY**

David N. Adjei, MSc, PhD<sup>1,2</sup>; Karien Stronks, MSc, PhD<sup>1</sup>; Dwomoa Adu, MD<sup>3</sup>; Erik Beune, MSc, PhD<sup>1</sup>; Karlijn Meeks, MSc, PhD<sup>1</sup>; Liam Smeeth, MD, PhD<sup>4</sup>; Juliet, Addo, MD, PhD<sup>4</sup>; Ellis Owuso-Dabo, MSc, PhD<sup>5</sup>; Kerstin Klipstein-Grobusch, MSc, PhD<sup>6,7</sup>; Frank P. Mockenhaupt, MD, PhD<sup>8</sup>; Ina, Danquah, MSc, PhD<sup>9,10</sup>; Joachim, Spranger, MD, PhD<sup>11,12,13</sup>; Silver Bahendeka, MD, PhD<sup>14</sup>; Ama de-Graft, Aikins, MSc, PhD<sup>15</sup>; Charles Agyemang, MPH, PHD<sup>1</sup>

1. Department of Public Health, Academic Medical Center, University of Amsterdam, Amsterdam Public Health Research Institute, Amsterdam, The Netherlands.
2. Department of Medical Laboratory Sciences, School of Biomedical and Allied Health Sciences, College of Health Sciences, University of Ghana, Accra, Ghana.
3. Department of Medicine, School of Medicine and Dentistry, University of Ghana and Korle-Bu Teaching Hospital, Accra, Ghana.
4. Department of Non-Communicable Disease Epidemiology, London School of Hygiene and Tropical Medicine, London, United Kingdom.
5. Kumasi Centre for Collaborative Research, KNUST, Kumasi, Ghana
6. Julius Global Health, Julius Center for Health Sciences and Primary Care, University Medical Centre, Utrecht University, The Netherlands.
7. Division of Epidemiology & Biostatistics, School of Public Health, Faculty of Health Sciences, University of the Witwatersrand, Johannesburg, South Africa.
8. Institute of Tropical Medicine and International Health, Charité – University Medicine Berlin, Augustenburger Platz 1, 13353 Berlin, Germany.
9. Department of Molecular Epidemiology, German Institute of Human Nutrition Potsdam-Rehbrücke, Nuthetal, Germany.
10. Charité - Universitaetsmedizin Berlin, Institute for Social Medicine, Epidemiology and Health Economics, Berlin, Germany.
11. Department of Endocrinology and Metabolism, Charité-University Medicine Berlin, Berlin, Germany.
12. German Centre for Cardiovascular Research (DZHK), Berlin, Germany.
13. Center for Cardiovascular Research (CCR), Charité-University Medicine Berlin, Berlin, Germany.
14. MKPGMS - Uganda Martyrs University, Kampala, Uganda.
15. Regional Institute for Population Studies, University of Ghana, Legon, Ghana.

Address correspondence to David Nana Adjei, MSc, PhD Department of Public Health, Academic Medical Centre, University of Amsterdam, Meibergdreef 9, 1105 AZ Amsterdam, the

1  
2  
3 38 Netherlands, School of Biomedical and Allied Health Sciences, Medical Laboratory Sciences,  
4  
5 39 University of Ghana, E-mail: [dna@chs.edu.gh](mailto:dna@chs.edu.gh), [d.n.adjei@amc.uva.nl](mailto:d.n.adjei@amc.uva.nl), Tel: +233236717850  
6  
7

## 8 40 **Abstract**

9 41  
10 42 **Objectives:** Studies from high income countries suggest higher prevalence of Chronic Kidney Disease  
11 43 (CKD) among individuals in low socio-economic groups. However, some studies from low and middle-  
12 44 income countries (LMICs) show the reverse pattern among those in high socioeconomic groups. It is  
13 45 unknown which pattern applies to individuals living in rural and urban Ghana. We therefore assessed the  
14 46 association between Socio-Economic Status (SES) indicators and CKD in rural and urban Ghana and to  
15 47 what extent the higher SES of people in urban areas of Ghana could account for differences in CKD  
16 48 between rural and urban populations.  
17 49

18 50 **Methods:** We used baseline data from multi-centre Research on Obesity and Diabetes among  
19 51 African Migrants (RODAM) study. The sample consisted of 2492 adults (Rural Ghana, 1043, Urban  
20 52 Ghana, 1,449) aged 25 to 70 years living in Ghana. Three CKD outcomes were considered using the 2012  
21 53 KDIGO (Kidney Disease: Improving Global Outcomes) severity of CKD classification: albuminuria  
22 54 (albumin-creatinine ratio  $\geq 3$  mg/mmol (category  $\geq$  A2)); reduced glomerular filtration rate (eGFR  $< 60$   
23 55 mL/min/1.73 m<sup>2</sup> (category  $\geq$  G3)) and high to very high CKD risk based on the combination of these two.  
24 56  
25 56

26 57 **Results:** All three SES indicators were not associated with CKD in both rural and urban Ghana after age  
27 58 and sex adjustment except for rural Ghana where high wealth index was significantly associated with  
28 59 higher odds of reduced eGFR (AOR, 2.38; 95% C.I. 1.03-5.47). The higher rate of CKD observed in  
29 60 urban Ghana was not explained by the higher SES of that population.  
30 61

31 62 **Conclusion:** SES indicators were not associated with prevalence of CKD except for wealth index and  
32 63 reduced eGFR in rural Ghana. Consequently, the higher SES of did not account for the increased rate of  
33 64 CKD among urban dwellers suggesting the need to identify other factors that may be driving this.  
34 65  
35 65

36 66  
37 67 **Index Words:** Chronic kidney disease; socioeconomic status; health inequalities; risk factor; ethnic  
38 68 minority groups; migrants; RODAM study, Ghana  
39 69  
40 69

41 70

42 71

43 72

44 73

45 74

46 75

47 76

48 77

49 78

1  
2  
3  
4 79  
5 80  
6  
7 81  
8  
9 82  
10 83  
11  
12 84  
13  
14 85  
15 86  
16  
17 87  
18 88  
19  
20 89  
21  
22 90  
23  
24 91  
25 92  
26  
27 93  
28 94  
29  
30 95  
31  
32 96  
33 97  
34  
35 98  
36 99  
37  
38 100  
39  
40 101  
41 102  
42  
43 103  
44  
45 104  
46  
47 105  
48 106  
49  
50 107  
51  
52 108  
53 109  
54  
55 110  
56  
57  
58  
59  
60

### Strengths and limitation of the study

- The use of well-standardized study protocols across rural and urban Ghana eliminated intra protocol variability.
- Our study is also the first in Africa to use all three categories of CKD definitions (albuminuria, reduced eGFR and CKD risk) by KDIGO 2012 in assessing association of SES with CKD in rural and urban setting. This provides more detailed information on CKD outcomes.
- The limitation of intra laboratory variability in earlier studies was eliminated using the same standard operating procedures in the same laboratory for running all samples for both rural and urban Ghana.
- The use of three constructs of SES (educational level, occupational level and wealth index) in this study also provides a much better holistic approach to assessing SES associations with CKD.
- Our study was limited because of the use of cross sectional design which prevented us from determining causality between predictors and CKD progression.

1  
2  
3  
4 111  
5 112  
6  
7 113  
8  
9 114  
10 115  
11  
12 116  
13  
14 117  
15 118  
16  
17 119  
18  
19 120  
20 121  
21  
22 122  
23  
24 123  
25 124  
26  
27 125  
28  
29 126  
30 127  
31 128  
32 129  
33 130  
34 131  
35 132  
36 133  
37 134  
38 135  
39 136  
40 137  
41 138  
42  
43  
44  
45  
46  
47  
48  
49  
50  
51  
52  
53  
54  
55  
56  
57  
58  
59  
60

## Introduction

In general, individuals in lower socio-economic status (SES) groups have been shown to suffer more frequently from Chronic Kidney Disease (CKD), often progressing to End Stage Renal Disease (ESRD), and associated with inadequate dialysis treatment, reduced access to kidney transplantation and poor health outcomes<sup>1</sup>. Recent studies have consistently found low SES to be associated with higher risk of CKD among people of African origin<sup>2-5</sup>.

However, in some settings the well-known inverse association between SES and CKD seems to be absent, or even reversed. For example, Bryne et al. did not find an association between SES and End Stage Renal Disease<sup>6</sup>. Other studies have found a positive association between SES and CKD<sup>7 8</sup>. Specifically, as SES improved, unhealthful lifestyle (unhealthy diet, physical inactivity, smoking and alcohol consumption) increased in China while that of the United States decreased with improved SES<sup>9</sup>. People with higher incomes, in these contexts, can afford a western

1  
2  
3 139 lifestyle, which is more readily available in the urban areas than in the rural areas.

4  
5 140 There is therefore an interaction between individual SES and environmental factors,

6  
7  
8 141 such as food and sedentary life style in such populations <sup>10-12</sup>. Consequently, in those

9  
10  
11 142 settings, people with a higher SES might have higher CKD risk.

12  
13 143 In urban areas, the population in general has a higher SES than in rural areas <sup>13</sup>. For example, individuals

14  
15 144 with higher educational level migrate from rural areas to find higher occupations matching their higher

16  
17 145 education to improve on their wealth. If indeed a positive association between SES and CKD is observed

18  
19 146 in LMICs, this might underlie the well-known health differences between urban and rural areas, with

20  
21 147 urban areas having an increased risk of CKD <sup>14</sup>. So far, it is unknown whether the reversed SES gradient

22  
23 148 (higher risk in high SES group) might explain the higher burden of CKD in urban areas as compared to

24  
25 149 rural areas in Africa.

26  
27 150

28  
29 151 In view of this, we assessed the association of SES with CKD in rural and urban Ghana and studied what

30  
31 152 extent the higher SES of people in urban areas could account for differences in CKD between rural and

32  
33 153 urban populations.

34  
35 154

36  
37 155

38  
39 156

40  
41 157

42  
43 158

44  
45 159

46  
47 160

## 48 49 161 **Methods**

50  
51 162

### 52 53 163 *Study population and study design*

54  
55 164 In the present analyses, data from the RODAM (Research on Obesity & Diabetes

56  
57 165 among African Migrants) study, a multi-centre cross-sectional study were used. The

58  
59 166 rationale, conceptual framework, design and methodology of the RODAM study have

60  
167 been described in detail elsewhere <sup>15 16</sup>. As the Healthy Life in an Urban Setting



1  
2  
3 168 (HELIUS) study conducted among Ghanaian migrants living in Amsterdam did not find any  
4  
5 169 associations between SES and CKD <sup>17</sup> the current study focused on rural and urban Ghana (Ashanti  
6  
7 170 region of Ghana). The RODAM study was conducted from 2012 to 2015 and it comprised  
8  
9 171 of individuals aged 25-70 years living in rural and urban Ghana and Ghanaian  
10  
11 172 migrants in Europe. All participants below 25 and above 70 years were excluded in  
12  
13 173 the present analyses. The present analysis was restricted to the rural and urban sites  
14  
15 174 (n=2492) RODAM participants. Specifically, 1043 participants from rural Ghana and  
16  
17 175 1449 from urban Ghana were used in this study.  
18  
19  
20  
21

22 177 Data collection for the study was standardized across all sites. Written informed  
23  
24 178 consent was obtained from each participant prior to enrolment in the study. The  
25  
26 179 respective ethics committees in Ghana and the three European countries approved the  
27  
28 180 study protocols before data collection began. Specifically, we obtained ethical clearance  
29  
30 181 in Ghana from School of Medical Sciences/Komfo Anokye Teaching Hospital  
31  
32 182 Committee on Human Research, Publication & Ethical Review Board. In the  
33  
34 183 Netherlands the Institutional Review Board of the AMC, University of Amsterdam gave  
35  
36 184 approval for the study. In Germany, approval for the study was obtained from the  
37  
38 185 Ethics Committee of Charite-Universitätsmedizin. The London School of Hygiene and  
39  
40 186 Tropical Medicine Research Ethics Committee gave approval for the study in the UK.  
41  
42  
43  
44  
45

46 187 The response rate was 76% in rural Ghana and 74% in urban Ghana. In Ghana,  
47  
48 188 participants were randomly drawn from a list of 30 enumeration areas in the Ashanti  
49  
50 189 region based on the 2010 population census using the multistage random sampling.  
51  
52 190 These enumeration areas came from two purposively selected urban cities (Kumasi  
53  
54 191 and Obuasi) and 15 randomly selected rural communities in the Ashanti region.  
55  
56  
57  
58  
59  
60

1  
2  
3 192 Selected health and community authorities were first identified, notified of the study  
4  
5  
6 193 and letters were sent giving detailed explanation of the study. We sent team members  
7  
8 194 to stay among the communities to familiarize with them and organize mini clinics in  
9  
10 195 the field. This lasted between 1-2 weeks depending on the sampled population and  
11  
12 196 responsiveness of respondents.

13  
14  
15  
16 197 In Ghana, questionnaires administration and physical examination were done at the  
17  
18 198 same day/time. The participants were instructed to fast from 10.00 pm the night before  
19  
20 199 the physical examination. For the current study, 2566 participants with data available  
21  
22 200 on both questionnaire data and physical measurements were used. We excluded  
23  
24 201 (n=74) individuals outside the RODAM age range of 25-70 years resulting in a data  
25  
26 202 set of 2492 for analysis. These comprised 1,449 Urban Ghana and 1043 Rural Ghana.  
27  
28 203 For the final analysis, individuals with no data on CKD status (n=42) were excluded.

## 204 **Measurements**

### 205 **Covariates**

#### 206 *Demographic and lifestyle factors*

207 Information on demographics, educational level, occupational level, wealth index and lifestyle factors  
208 (smoking and physical activity) were obtained by questionnaire. Physical examinations were performed  
209 with validated devices per standardized operational procedures across all study sites. Weight was  
210 measured in light clothing and without shoes with SECA 877 scales to the nearest 0.1 kg. Height was  
211 measured without shoes with a portable stadiometer (SECA 217) to the nearest 0.1 cm. Body mass index  
212 (BMI) was calculated as weight (kg) divided by height squared ( $m^2$ ). Overweight was defined as BMI of  
213  $\geq 25$  to  $< 30$   $kg/m^2$  and obesity as BMI  $\geq 30$   $kg/m^2$ <sup>18</sup>. Per participant, all anthropometrics were measured  
214 twice by the same assessor and the average of the two measurements were used for analyses.

#### 215 *Predictor: SES*

1  
2  
3 216 Socioeconomic indicators used in this study were educational level, occupational status and level of  
4 217 wealth index. Educational level was determined based on self-reported highest educational qualification  
5 218 accomplished based on the Ghanaian educational system. Occupational level was determined based on  
6 219 self-reported current occupation if still employed and/or last occupation before retirement or student. The  
7 220 reported occupations were further coded according to the International Standard Classification of  
8 221 Occupations scheme (ISCO-08). Where 'high' (professionals, managers, clerical support staff, higher  
9 222 grade routine non-manual employees service and sales-related occupations) and 'low' (craft and related  
10 223 trades workers, elementary occupations and farmers) and the rest were categorized into the 'middle'.  
11 224 Wealth index was determined using the World Health Organization (WHO) standard of wealth index  
12 225 classification. Wealth index was based on data collected in the Household Questionnaire. The  
13 226 questionnaire comprised of questions on household's ownership of several consumer items such as  
14 227 television, car, flooring material, toilet facilities etc. Each household was assigned a standard score for  
15 228 each asset. Wealth index was then expressed in five categories. The five categories were further  
16 229 categorized into three categories by combining the second and third category due to small numbers<sup>19</sup>. All  
17 230 three SES constructs were further classified as low, medium and high SES and their relationship to each  
18 231 other tested. A composite SES variable (SES) was generated based on the three SES constructs  
19 232 (education, occupation and wealth index) using the EGEN group command in STATA. The codes were  
20 233 combined into numerical variables and their averages computed. The resultant values were recoded into  
21 234 three categories (low, medium and high).

### 235 *Co-morbidity factors*

236 Blood pressure (BP) was measured three times using a validated semi-automated device (The Microlife  
237 WatchBP home) with appropriate cuffs in a sitting position after at least 5 min rest. The mean of the last  
238 two BP measurements was used in the analyses. Hypertension was defined as systolic BP  $\geq$  140 mmHg,  
239 and/or diastolic BP  $\geq$  90 mmHg, and/or being on antihypertensive medication treatment, and/or self-  
240 reported hypertension. Trained research assistants in the two sites collected fasting venous blood samples.  
241 All the blood samples were processed and aliquoted immediately (within one hour to maximum three  
242 hours of the vena puncture) after collection per standard operation procedures, and then temporarily  
243 stored at the local research location at  $-20^{\circ}\text{C}$ . The separated samples were then transported to the local  
244 research centres laboratories, where they were checked, registered and stored at  $-80^{\circ}\text{C}$ . To avoid intra-  
245 laboratory variability, the stored blood samples from the local research centres were transported to Berlin,  
246 Germany for biochemical analyses. Fasting plasma glucose concentration was measured using an  
247 enzymatic method (hexokinase). Type 2 diabetes was defined according to the WHO diagnostic criteria  
248 (fasting glucose  $\geq$ 7.0 mmol/L, and/or current use of medication prescribed to treat diabetes, and/or self-

1  
2  
3 249 reported diabetes)<sup>20</sup>. Concentration of total cholesterol was assessed using colorimetric test kits. All  
4  
5 250 biochemical analyses were performed using an ABX Pentra 400 chemistry analyzer (ABX Pentra; Horiba  
6  
7 251 ABX, Germany). Hypercholesterolemia was defined as total cholesterol level  $\geq 6.22$  mmol/L. Serum  
8  
9 252 creatinine concentration (in  $\mu\text{mol/L}$ ) was determined by a kinetic colorimetric spectrophotometric isotope  
10  
11 253 dilution mass spectrometry–calibrated method (Roche Diagnostics). Biochemical analyses were subject to  
12  
13 254 extensive quality checks including blinded serial measurements.

### 14 255 **Outcome: CKD prevalence**

15  
16 256 Participants were asked to bring an early morning urine sample for the analyses of albuminuria and  
17  
18 257 creatinine levels. Urinary albumin concentration (in mg/L) was measured by an immunochemical  
19  
20 258 turbidimetric method (Roche Diagnostics). Urinary creatinine concentration (in  $\mu\text{mol/L}$ ) was measured by  
21  
22 259 a kinetic spectrophotometric method (Roche Diagnostics). Estimated glomerular filtration rate (eGFR)  
23  
24 260 was calculated using the CKDEPI (CKD Epidemiology Collaboration) creatinine equation<sup>21</sup>. Urinary  
25  
26 261 albumin-creatinine ratio (ACR; expressed in mg/g) was calculated by taking the ratio between urinary  
27  
28 262 albumin and urinary creatinine. eGFR and albuminuria were categorized according to the 2012 KDIGO  
29  
30 263 (Kidney Disease: Improving Global Outcomes) classification<sup>22</sup>. eGFR was categorized as follows: G1,  $\geq$   
31  
32 264 90 mL/min/1.73 m<sup>2</sup> (normal kidney function); G2, 60 to 89 mL/min/1.73 m<sup>2</sup> (mildly decreased); G3a, 45  
33  
34 265 to 59 mL/min/1.73 m<sup>2</sup> (mildly to moderately decreased); G3b, 30 to 44 mL/min/1.73 m<sup>2</sup> (moderately to  
35  
36 266 severely decreased); G4, 15 to 29 mL/min/1.73 m<sup>2</sup> (severely decreased); and G5,  $< 15$  mL/min/1.73 m<sup>2</sup>  
37  
38 267 (kidney failure). Albuminuria categories were derived from ACR and were as follows: A1,  $< 3$  mg/mmol  
39  
40 268 (normal to mildly increased); A2, 3 to 30 mg/mmol (moderately increased); and A3,  $> 30$  mg/mmol  
41  
42 269 (severely increased). CKD status was categorized according to severity of kidney disease (green, low risk;  
43  
44 270 yellow, moderately increased risk; orange, high risk; and red, very high risk) using the combination of  
45  
46 271 eGFR (G1-G5) and albuminuria (A1-A3) levels defined by the 2012 KDIGO guideline<sup>23</sup>. Due to the  
47  
48 272 small number of participants in the very high risk category of CKD, high and very high risk groups were  
49  
50 273 combined. Reduced eGFR was defined as eGFR  $< 60$  mL/min/1.73 m<sup>2</sup>. Because of the small number of  
51  
52 274 participants in the severely increased albuminuria category, we defined albuminuria as ACR  $\geq 3$  mg/mmol  
53  
54 275 by combining the moderately increased (A2) and severely increased (A3) categories.

### 55 276 **Patient and Public Involvement**

56  
57 277 Community leaders were involved in the recruitment of patients. These comprised of religious  
58  
59 278 communities (churches and mosques), endorsement from local key leaders and establishing relationships  
60  
279 with healthcare organizations. We also provided information on the study by involving the local media  
280 (radio and television stations). We sent letters to all selected health and community authorities to notify

1  
2  
3 281 participants of the study. Team members were sent to the various communities to stay among the  
4  
5 282 community and organize mini clinics for a period of 1-2 weeks. Results of the study were disseminated  
6  
7 283 through seminars, durbars and via radio and television stations.

## 8 9 284 **Statistical methods**

10  
11 285 Participants' characteristics were expressed as absolute numbers and percentages for categorical variables  
12  
13 286 and as means and standard deviations (SD) for continuous variables. CKD prevalence with 5% error bars  
14  
15 287 were presented as bar graphs for each SES construct across rural and urban Ghana. Spearman's rank  
16  
17 288 correlation was used to determine correlations between the three SES constructs. Odds ratios (ORs) and  
18  
19 289 their corresponding 95% confidence intervals (CIs) were estimated by means of logistic regression  
20  
21 290 analyses to study the odds of albuminuria (ACR>3 mg/mmol, A2-A3, moderately to severely increased  
22  
23 291 albuminuria), reduced kidney function (eGFR< 60 mL/min/1.73 m<sup>2</sup>, G3-G5 moderately to severely  
24  
25 292 decreased kidney function) and increased CKD risk (high and very high CKD risk) by SES, with  
26  
27 293 adjustments for potential confounders (age and sex).<sup>24</sup> In addition, the analyses were performed for the  
28  
29 294 total population (using low educational level, low occupational status and low level of wealth index as  
30  
31 295 reference categories). Further analysis was conducted to assess the contribution of SES  
32  
33 296 indicators to rural-urban differences in albuminuria, reduced eGFR and CKD risk using  
34  
35 297 rural Ghana as reference. Tolerance test and variance inflation factor (VIF) showed  
36  
37 298 very small degree of collinearity among SES predictors thus we therefore adjusted for  
38  
39 299 each of SES variables separately. Complete case analysis approach was used. All  
40  
41 300 data available were included in the age-adjusted models. All analyses were performed  
42  
43 301 using STATA, version 14.0 (StataCorp LP).

## 44 302 **Results**

45 303  
46  
47 304 Table 1 shows characteristics of study participants. Participants in rural Ghana were  
48  
49 305 slightly older than those in urban Ghana. Female preponderance was observed in both  
50  
51 306 rural and urban Ghana, though higher proportions were observed in urban Ghana.  
52  
53  
54 307 Individuals living in rural Ghana were generally less educated compared with those  
55  
56  
57  
58  
59  
60

308 living in urban Ghana. There were slightly more individuals with low occupational  
 309 status in urban Ghana compared with their peers in rural Ghana. People in urban  
 310 Ghana were wealthier than their rural counterparts. Rural Ghanaians were more  
 311 physically active compared with their urban peers. Smoking was low among Ghanaians  
 312 though rural Ghanaians were more likely to smoke compared with their urban peers.  
 313 Hypercholesterolemia was more prevalent in urban Ghana than in rural Ghana.  
 314 Hypertension and type 2 diabetes were more prevalent in urban Ghanaians compared  
 315 with those living in rural Ghana. Urban Ghanaians were markedly more obese  
 316 compared with their rural peers. Except for eGFR, albuminuria and CKD risk  
 317 prevalence rates were higher in urban Ghana compared with rural Ghana.

318 **Table 1: Baseline characteristics by location**

|                               | Rural Ghana | Urban Ghana |
|-------------------------------|-------------|-------------|
| Number of participants, N (%) | 1043 (41.9) | 1449 (58.1) |
| Mean age, years (SD)          | 46.5 (12.6) | 45.2 (11.4) |
| Females, N (%)                | 638 (61.2)  | 1034 (71.4) |
| Educational level n (%)       |             |             |
| Low                           | 555 (56.9)  | 614 (43.9)  |
| Middle                        | 311 (31.9)  | 547 (39.1)  |
| High                          | 108 (11.2)  | 239 (17.0)  |
| Occupational status, n (%)    |             |             |
| Low                           | 250 (25.7)  | 374 (26.7)  |
| Middle                        | 628 (64.5)  | 818 (58.4)  |
| High                          | 96 (9.8)    | 209 (14.9)  |
| Wealth index, n (%)           |             |             |
| Low                           | 449 (46.5)  | 368 (26.6)  |
| Middle                        | 276 (28.6)  | 416 (30.0)  |

|    |                                                            |             |             |
|----|------------------------------------------------------------|-------------|-------------|
| 1  |                                                            |             |             |
| 2  |                                                            |             |             |
| 3  |                                                            |             |             |
| 4  | High                                                       | 241 (24.9)  | 602 (43.4)  |
| 5  | BMI (kg/m <sup>2</sup> )                                   |             |             |
| 6  |                                                            |             |             |
| 7  | < 25                                                       | 794 (76.3)  | 579 (39.9)  |
| 8  | 25-29.9                                                    | 189 (18.2)  | 495 (34.2)  |
| 9  |                                                            |             |             |
| 10 | ≥ 30                                                       | 58 (5.5)    | 374 (25.9)  |
| 11 |                                                            |             |             |
| 12 | Low physical activity, n (%)                               | 663 (47.22) | 592 (60.7)  |
| 13 | Smoking, n (%)                                             | 22 (2.3)    | 14 (1.0)    |
| 14 |                                                            |             |             |
| 15 | Hypercholesterolemia, n (%)                                | 78 (7.6)    | 270 (18.7)  |
| 16 |                                                            |             |             |
| 17 | Hypertension, n (%)                                        | 306 (29.3)  | 531 (36.7)  |
| 18 |                                                            |             |             |
| 19 |                                                            | 53          |             |
| 20 | Diabetes, n (%)                                            | (5.1)       | 153 (10.6)  |
| 21 |                                                            |             |             |
| 22 | Albuminuria, n (%)                                         |             |             |
| 23 |                                                            |             |             |
| 24 |                                                            | 930 (91.6)  |             |
| 25 | A1, Normal to mildly increased (ACR <3 mg/mmol)            | 85          | 1285 (89.1) |
| 26 | A2-A3, moderately to severely increased (ACR ≥ 3 mg/ (8.4) |             | 158 (10.9)  |
| 27 |                                                            |             |             |
| 28 | eGFR, n (%)                                                |             |             |
| 29 |                                                            |             |             |
| 30 | G1-G2 (≥ 60 mL/min/1.73m <sup>2</sup> )                    | 989 (96.3)  | 1388 (96.3) |
| 31 |                                                            |             |             |
| 32 | G3-G5 (<60 mL/min/1.73m <sup>2</sup> )                     | 38 (3.7)    | 54 (3.7)    |
| 33 |                                                            |             |             |
| 34 | CKD risk, n (%)                                            |             |             |
| 35 | Low risk (green)                                           | 916 (90.5)  | 1281 (88.9) |
| 36 |                                                            |             |             |
| 37 | Moderately increased to very high risk                     |             |             |
| 38 | (yellow to red)                                            | 96 (9.5)    | 160 (11.1)  |
| 39 |                                                            |             |             |

320

321 **Abbreviations:** N, number of respondents; SD, standard deviation; eGFR, estimated glomerular filtration rate; ACR, albumin  
 322 creatinine ratio; CKD, Chronic kidney disease

323

324 Figure 1 shows prevalence of CKD by level of education in urban and rural Ghana.

325 Prevalence of CKD decreased with increasing levels of education in rural Ghana.

326 Higher prevalence of CKD was observed among individuals with low educational level

327 compared with those with middle and high educational level. However, those with high

328 educational level in urban Ghana had higher prevalence of CKD compared with those

1  
2  
3 329 with middle level education. For occupational status, prevalence of CKD was higher  
4  
5  
6 330 among individuals with low occupational status in urban Ghana. Similar patterns were  
7  
8 331 observed in rural Ghana; however, those with higher occupational status had higher  
9  
10 332 prevalence of CKD compared with those with middle occupational status (Figure 2).  
11  
12 333 Figure 3 shows prevalence of CKD by level of wealth index. CKD prevalence among  
13  
14  
15 334 the levels of wealth index varied between urban and rural Ghana. Those with middle  
16  
17 335 level wealth index had higher prevalence of CKD compared with those with low or  
18  
19 336 high CKD prevalence in both rural and urban Ghana. CKD prevalence rate for low and  
20  
21  
22 337 high level wealth index in urban Ghana was the same while that of rural Ghana was  
23  
24 338 slightly different.



339 Among the whole group, educational level was positively associated with wealth index ( $p < 0.01$ ) and composite SES  
 340 ( $P < 0.01$ ). Occupational level was also inversely associated with educational level ( $p < 0.01$ ) and wealth index ( $p < 0.01$ ). In  
 341 urban Ghana, high educational level was positively associated with high wealth index but inversely associated with  
 342 occupation ( $p < 0.01$ ). In rural Ghana, high education was positively associated with high wealth index ( $p < 0.01$ ), but there  
 343 was no significant association between education and occupation. High wealth index was inversely associated with high  
 344 occupational status in both rural and urban Ghana ( $p < 0.01$ ) (Table 2).

346 **Table 2: Relationship between SES constructs (educational, occupational level and wealth index) by urban**  
 347 **rural Ghana**

| Correlation matrix  | Educational level | Occupational level | Wealth index | SES   |
|---------------------|-------------------|--------------------|--------------|-------|
| <b>Whole group</b>  |                   |                    |              |       |
| Educational level   | 1.000             |                    |              |       |
| Occupational status | <b>-0.060</b>     | 1.000              |              |       |
|                     | <b>0.004</b>      |                    |              |       |
| Wealth Index        | 0.282             | <b>-0.121</b>      | 1.000        |       |
|                     | 0.001             | <b>0.001</b>       |              |       |
| SES                 | <b>1.000</b>      | <b>-0.059</b>      | <b>0.282</b> | 1.000 |
|                     | <b>0.003</b>      | <b>0.006</b>       | <b>0.001</b> |       |

**Urban Ghana**

|                     |               |               |              |       |
|---------------------|---------------|---------------|--------------|-------|
| Educational level   | 1.000         |               |              |       |
| Occupational status | <b>-0.115</b> | 1.000         |              |       |
|                     | <b>0.001</b>  |               |              |       |
| Wealth Index        | <b>0.294</b>  | <b>-0.126</b> | 1.000        |       |
|                     | <b>0.001</b>  | <b>0.001</b>  |              |       |
| SES                 | <b>1.000</b>  | <b>-0.024</b> | <b>0.937</b> | 1.000 |
|                     | <b>0.002</b>  | <b>0.001</b>  | <b>0.001</b> |       |

**Rural Ghana**

|                     |              |               |              |       |
|---------------------|--------------|---------------|--------------|-------|
| Educational level   | 1.000        |               |              |       |
| Occupational status | 0.017        | 1.000         |              |       |
|                     | 0.589        |               |              |       |
| Wealth Index        | <b>0.219</b> | <b>-0.135</b> | 1.000        |       |
|                     | <b>0.001</b> | <b>0.001</b>  |              |       |
| SES                 | <b>0.504</b> | 0.017         | <b>0.934</b> | 1.000 |
|                     | <b>0.001</b> | 0.587         | <b>0.001</b> |       |

350

351

352

353

354

355

356

357

358

359

360

361 Table 3 shows association between level of education, occupational status, level of wealth index and prevalence of  
 362 CKD. After adjusting for age and sex for the whole group, albuminuria was associated with middle level education ( $p<0.01$ ). After adjusting for  
 363 age and sex, we observed no significant association between SES indicators (educational level, occupational status and wealth index) and CKD in  
 364 urban Ghana. However, middle and higher level education was associated with reduced albuminuria in urban Ghana ( $p<0.01$ ). Whereas  
 365 educational level and occupational status were not associated with CKD prevalence, high wealth index was significantly associated with higher  
 366 odds of reduced eGFR ( $p<0.01$ ).

367

368 **Table 3: Association of SES indicators (educational level, occupational status and wealth index level) with albuminuria, reduced eGFR and CKD risk**

369

| Albuminuria (ACR $\geq$ 3 mg/mmol) |             | eGFR < 60 mL/min/1.73 m <sup>2</sup> |             | High to very high CKD risk (KDIGO, 2012) |             |
|------------------------------------|-------------|--------------------------------------|-------------|------------------------------------------|-------------|
|                                    | OR (95% CI) |                                      | OR (95% CI) |                                          | OR (95% CI) |
| n (%)                              | Model 1     | n (%)                                | Model 1     | n (%)                                    | Model 1     |

| <b>Education</b>           |               |                         |              |                         |               |                         |
|----------------------------|---------------|-------------------------|--------------|-------------------------|---------------|-------------------------|
| <b>Whole group</b>         |               |                         |              |                         |               |                         |
| Low                        | 1,152 (11.89) | 1.00 (Reference)        | 1,160 (3.97) | 1.00 (Reference)        | 1,150 (11.91) | 1.00 (Reference)        |
| Middle                     | 847 (7.32)    | <b>0.66 (0.48-0.91)</b> | 849 (3.77)   | 1.36 (0.83-2.22)        | 845 (8.28)    | 0.82 (0.59-1.12)        |
| High                       | 343 (7.00)    | 0.67 (0.42-1.07)        | 345 (3.19)   | 1.11 (0.55-2.29)        | 343 (8.75)    | 0.96 (0.62-1.49)        |
| <b>Urban Ghana</b>         |               |                         |              |                         |               |                         |
| Low                        | 612 (14.7)    | 1.00 (Reference)        | 612 (4.1)    | 1.00 (Reference)        | 612 (14.1)    | 1.00 (Reference)        |
| Middle                     | 546 (7.8)     | <b>0.51 (0.34-0.76)</b> | 546 (3.7)    | 1.12 (0.59-2.12)        | 545 (8.1)     | <b>0.59 (0.39-0.89)</b> |
| High                       | 238 (8.4)     | <b>0.53 (0.31-0.91)</b> | 238 (3.4)    | 0.91 (0.37-2.19)        | 238 (10.9)    | 0.83 (0.51-1.38)        |
| <b>Rural Ghana</b>         |               |                         |              |                         |               |                         |
| Low                        | 540 (8.7)     | 1.00 (Reference)        | 548 (3.8)    | 1.00 (Reference)        | 538 (9.5)     | 1.00 (Reference)        |
| Middle                     | 301 (6.3)     | 0.89 (0.51-1.59)        | 303 (3.9)    | 1.69 (0.77-3.66)        | 300 (8.7)     | 1.33 (0.79-2.25)        |
| High                       | 105 (3.8)     | 0.66 (0.23-1.95)        | 107 (2.8)    | 1.28 (0.35-4.71)        | 105 (3.8)     | 0.69 (0.23-2.02)        |
| <b>Occupational status</b> |               |                         |              |                         |               |                         |
| <b>Whole group</b>         |               |                         |              |                         |               |                         |
| Low                        | 614 (9.93)    | 1.00 (Reference)        | 616 (2.76)   | 1.00 (Reference)        | 613 (9.46)    | 1.00 (Reference)        |
| Middle                     | 1,427 (9.25)  | 0.82 (0.59-1.14)        | 1,436 (3.34) | 0.93 (0.52-1.66)        | 1,424 (9.90)  | 0.89 (0.65-1.24)        |
| High                       | 302 (10.26)   | 0.76 (0.47-1.22)        | 303 (7.92)   | 1.33 (0.67-2.62)        | 302 (12.91)   | 0.90 (0.57-1.42)        |
| <b>Urban Ghana</b>         |               |                         |              |                         |               |                         |
| Low                        | 207 (10.1)    | 1.00 (Reference)        | 207 (6.8)    | 1.00 (Reference)        | 207 (12.1)    | 1.00 (Reference)        |
| Middle                     | 817 (11.1)    | 1.50 (0.88-2.83)        | 817 (3.6)    | 1.15 (0.56-2.35)        | 816 (11.6)    | 1.37 (0.84-2.56)        |
| High                       | 373 (11.0)    | 1.57 (0.89-2.53)        | 373 (2.7)    | 1.02 (0.41-2.52)        | 373 (9.7)     | 1.21 (0.68-2.14)        |
| <b>Rural Ghana</b>         |               |                         |              |                         |               |                         |
| Low                        | 95 (10.5)     | 1.00 (Reference)        | 96 (10.4)    | 1.00 (Reference)        | 95 (14.7)     | 1.00 (Reference)        |
| Middle                     | 610 (6.7)     | 0.65 (0.31-1.37)        | 619 (3.1)    | <b>0.37 (0.16-0.85)</b> | 608 (7.6)     | 0.55 (0.28-1.08)        |
| High                       | 241 (8.3)     | 0.99 (0.43-2.28)        | 243 (2.9)    | 0.51 (0.18-1.44)        | 240 (9.2)     | 0.94 (0.44-2.01)        |
| <b>Wealth index</b>        |               |                         |              |                         |               |                         |
| <b>Whole group</b>         |               |                         |              |                         |               |                         |

1  
2  
3  
4  
5  
6  
7  
8  
9  
10  
11  
12  
13  
14  
15  
16  
17  
18  
19  
20  
21  
22  
23  
24  
25  
26  
27  
28  
29  
30  
31  
32  
33  
34  
35  
36  
37  
38  
39  
40  
41  
42  
43  
44  
45  
46  
47

|                    |             |                  |            |                         |            |                  |
|--------------------|-------------|------------------|------------|-------------------------|------------|------------------|
| Low                | 808 (9.65)  | 1.00 (Reference) | 813 (3.32) | 1.00 (Reference)        | 808 (9.16) | 1.00 (Reference) |
| Middle             | 678 (10.91) | 1.18 (0.84-1.66) | 683 (3.81) | 1.30 (0.74-2.28)        | 675 (12.0) | 1.43 (1.02-2.01) |
| High               | 835 (8.62)  | 0.93 (0.66-1.31) | 835 (4.19) | 1.55 (0.91-2.64)        | 833 (9.96) | 1.21 (0.86-1.69) |
| <b>Urban Ghana</b> |             |                  |            |                         |            |                  |
| Low                | 367 (11.2)  | 1.00 (Reference) | 367 (3.5)  | 1.00 (Reference)        | 367 (10.1) | 1.00 (Reference) |
| Middle             | 414 (12.3)  | 1.12 (0.73-1.74) | 414 (3.9)  | 1.30 (0.61-2.80)        | 413 (13.1) | 1.45 (0.93-2.27) |
| High               | 601 (9.8)   | 0.82 (0.55-1.25) | 600 (3.8)  | 1.13 (0.55-2.31)        | 600 (10.8) | 1.11 (0.72-1.71) |
| <b>Rural Ghana</b> |             |                  |            |                         |            |                  |
| Low                | 441 (7.9)   | 1.00 (Reference) | 446 (3.1)  | 1.00 (Reference)        | 441 (8.4)  | 1.00 (Reference) |
| Middle             | 264 (8.7)   | 1.13 (0.65-1.98) | 269 (3.7)  | 1.22 (0.52-2.84)        | 262 (10.3) | 1.31 (0.77-2.25) |
| High               | 234 (5.6)   | 0.78 (0.40-1.53) | 235 (5.1)  | <b>2.38 (1.03-5.47)</b> | 233 (7.7)  | 1.16 (0.63-2.14) |

Model 1, adjusted for age and sex; Abbreviations: CI, confidence interval; ACR, albumin creatinine ration; eGFR, estimated glomerular filtration rate; CKD, chronic kidney disease; OR, odds ratio, n= total number of individuals in the whole group, rural and urban Ghana among the various levels of SES constructs; %, proportion of individuals with CKD among the various levels of SES constructs in rural and urban Ghana.

Table 4 shows the contribution of all three SES constructs to rural and urban CKD prevalence differences. The odds of albuminuria and CKD risk was significantly higher in urban Ghana compared with rural Ghana. The higher rate of CKD observed in urban Ghana was not explained by the higher SES of that population as compared to their rural counterparts.

**Table 4: Contribution of SES indicators to rural-urban differences in albuminuria, reduced eGFR and CKD risk**

---

OR (95% CI)    OR (95% CI)    OR (95% CI)    OR (95% CI)    OR (95% CI)

|                                               |             | Model 1            | Model 2            | Model 3            | Model 4            | Model 5            |
|-----------------------------------------------|-------------|--------------------|--------------------|--------------------|--------------------|--------------------|
| <b>Albuminuria (ACR ≥ 3 mg/mmol)</b>          |             |                    |                    |                    |                    |                    |
|                                               | n cases     |                    |                    |                    |                    |                    |
| Sites                                         | (%)         |                    |                    |                    |                    |                    |
|                                               | 1,443       | <b>1.37 (1.03-</b> | <b>1.70 (1.25-</b> | <b>1.55 (1.15-</b> | <b>1.62 (1.18-</b> | <b>1.74 (1.27-</b> |
| Urban Ghana                                   | (10.9)      | <b>1.81)</b>       | <b>2.31)</b>       | <b>2.10)</b>       | <b>2.19)</b>       | <b>2.38)</b>       |
|                                               |             | 1.00               | 1.00               | 1.00               | 1.00               | 1.00               |
| Rural Ghana                                   | 1,015 (8.4) | (Reference)        | (Reference)        | (Reference)        | (Reference)        | (Reference)        |
| <b>eGFR &lt; 60 mL/min/1.73 m<sup>2</sup></b> |             |                    |                    |                    |                    |                    |
|                                               | n cases     |                    |                    |                    |                    |                    |
| Sites                                         | (%)         |                    |                    |                    |                    |                    |
|                                               |             | 1.27 (0.82-        | 1.20 (0.76-        | 1.18 (0.79-        | 1.12 (0.70-        | 1.07 (0.67-        |
| Urban Ghana                                   | 1,442 (3.7) | 1.97)              | 1.89)              | 1.86)              | 1.78)              | 1.72)              |
|                                               |             | 1.00               | 1.00               | 1.00               | 1.00               | 1.00               |
| Rural Ghana                                   | 1,027 (3.7) | (Reference)        | (Reference)        | (Reference)        | (Reference)        | (Reference)        |
| <b>High to very high CKD risk</b>             |             |                    |                    |                    |                    |                    |
|                                               | n cases     |                    |                    |                    |                    |                    |
| Sites                                         | (%)         |                    |                    |                    |                    |                    |
|                                               | 1,441       | <b>1.23 (1.01-</b> | <b>1.44 (1.07-</b> | <b>1.38 (1.03-</b> | <b>1.36 (1.01-</b> | <b>1.40 (1.04-</b> |
| Urban Ghana                                   | (11.1)      | <b>1.62)</b>       | <b>1.93)</b>       | <b>1.84)</b>       | <b>1.83)</b>       | <b>1.91)</b>       |
|                                               | 1,012       | 1.00               | 1.00               | 1.00               | 1.00               | 1.00 (Reference)   |
| Rural Ghana                                   | (9.46)      | (Reference)        | (Reference)        | (Reference)        | (Reference)        | (Reference)        |

383

1  
2  
3  
4  
5  
6  
7  
8  
9  
10  
11  
12  
13  
14  
15  
16  
17  
18  
19  
20  
21  
22  
23  
24  
25  
26  
27  
28  
29  
30  
31  
32  
33  
34  
35  
36  
37  
38  
39  
40  
41  
42  
43  
44  
45  
46  
47

384 Model 1#: adjusted for age and sex; Model 2: adjusted for age, sex and education level; Model 3: adjusted for age, sex and occupational status;  
385 Model 4: adjusted for age, sex and wealth index; Model 5: adjusted for age, sex, educational level, occupational status and wealth index;  
386 Abbreviations: CI, confidence interval; ACR, albumin creatinine ratio; eGFR, estimated glomerular filtration rate; CKD, chronic kidney disease; OR, odds ratio, n= total number  
387 of individuals in rural and urban Ghana; %, proportion of individuals with CKD among urban and rural Ghana.

For peer review only

1  
2  
3 388 **Discussion**

4  
5  
6 389 ***Key findings***

7  
8 390 Our study findings show no association between all three SES constructs and the  
9  
10 391 prevalence of CKD in both rural and urban Ghana except for wealth index in rural  
11  
12 392 Ghana, with the risk of CKD being higher in the wealthier populations. The higher rate  
13  
14 393 of CKD observed in urban Ghana could not be attributed to the higher SES of that  
15  
16 394 population compared to their rural counterparts.  
17  
18  
19

20 395

21  
22 396 **Discussion of key findings**

23  
24 397

25  
26 398 ***Association of SES with CKD in rural and urban Ghana***

27  
28 399

29  
30 400 Our study did not find any significant associations between all three SES constructs  
31  
32 401 and CKD among rural and urban Ghana except for wealth index in rural Ghana. The  
33  
34 402 positive association observed between wealth index in rural Ghana may be due to  
35  
36 403 several reasons. A comparison of the three SES constructs showed higher educational  
37  
38 404 level to be associated with wealth index in both rural and urban Ghana but not  
39  
40 405 occupational level. This seems to suggest that occupational level may not be  
41  
42 406 adequately capturing the SES status of individuals living in these settings in relation to  
43  
44 407 CKD. For example, Masthi et al, compared different SES scales in rural and urban  
45  
46 408 India and concluded that Standard of Living Index (SLI) scale was more accurate for classification  
47  
48 409 of SES in urban and rural settings<sup>25</sup>. Our finding is consistent with other studies,<sup>6 26</sup> which  
49  
50 410 reported no association between SES and CKD in high-income countries and LMICs,  
51  
52 411 but in contrast with other studies<sup>2-4 27</sup> that found positive associations between SES  
53  
54  
55  
56  
57  
58  
59  
60



1  
2  
3 412 and CKD. The reasons for our current finding are unclear. However, it has been  
4  
5  
6 413 suggested that these inconsistent associations may be due to the varying pathways  
7  
8 414 through which the effect of SES on health status is mediated. For example, at a given  
9  
10 415 educational level marked ethnic differences have been reported. Additionally, similar  
11  
12  
13 416 differences were observed for wealth status at a given income level <sup>28-30</sup>.

14  
15  
16 417

17 418 ***Contribution of SES to observed CKD risk differences between rural and***  
18  
19 419 ***urban Ghana***

20  
21 420

22 421 We observed higher rates of CKD in urban Ghana compared with rural Ghana, as expected. The observed  
23  
24 422 higher rates of CKD in our study were not explained by the higher SES of that population as compared to  
25  
26 423 their rural counterparts. Our results indicate that this is due to the lack of a clear difference in the SES  
27  
28 424 distribution of rural and urban Ghana observed in this study, as well as to the lack of associations between  
29  
30 425 SES and CKD. Consistent with our findings, in a study conducted in Northern Tanzania SES did not  
31  
32 426 explain increased risk of CKD in urban Tanzania <sup>26</sup>. The lack of associations between SES and CKD  
33  
34 427 could probably partly be explained by the process of epidemiological transition in relation to the  
35  
36 428 “diffusion theory” of ischemic heart disease mortality. This theory attributes the commencement of  
37  
38 429 ischemic heart disease to individuals in the high SES group due to their ability to afford behaviours  
39  
40 430 (smoking, alcohol and sedentary lifestyles) which increased risk of ischemic heart disease. The lower SES  
41  
42 431 groups were later affected partially because of improved living standards, imitation and urbanization. The  
43  
44 432 higher SES groups were the first to embrace behavioural changes required to decrease the risk of ischemic  
45  
46 433 heart disease and this resulted in reversing the gradient <sup>31</sup>. The rapid urbanization of some rural  
47  
48 434 communities in the Ashanti region of Ghana and the imitation of urban lifestyle could  
49  
50 435 account for our finding. Also, it could be that whereas the high SES group in urban  
51  
52 436 Ghana has already embraced favourable behavioural changes, those in rural Ghana  
53  
54 437 are yet to do so <sup>32</sup>. This explains the observed association of wealth index with CKD in rural Ghana  
55  
56 438 but not in urban Ghana. Also, the interplay of other less understood or researched factors

1  
2  
3 439 (e.g., exposure to nephrotoxins, herbal medications, sepsis, psychosocial factors) may  
4  
5  
6 440 be influencing the pathway in which SES influences CKD prevalence and progression.  
7

8 441

9  
10 442 ***Strength and limitation***

11 443

12 444 Our study presents several strengths. First, we used well-standardized study protocols across rural and  
13  
14 445 urban Ghana. Our study is also the first in Africa to use all three categories of CKD definition  
15  
16 446 (albuminuria, reduced eGFR and CKD risk) by KDIGO 2012 in assessing association of SES with CKD  
17  
18 447 in rural and urban setting, this provided more detailed information on CKD outcomes. The limitation of  
19  
20 448 intra laboratory variability in earlier studies was eliminated using the same standard operating procedures  
21  
22 449 in the same laboratory for running all samples for both rural and urban Ghana. The use of three constructs  
23  
24 450 of SES in this study also provides a much better holistic approach to assessing SES. Also, the distribution  
25  
26 451 of SES in our study reflects on the national data allowing for generalization of our findings. Our study  
27  
28 452 was limited by the use of cross sectional design, which prevented us from determining causality between  
29  
30 453 predictors and CKD progression. Furthermore, there were more women than men in our study due to the  
31  
32 454 higher response rate in women compared with men. However, this applied to both rural and urban Ghana.  
33  
34 455 We therefore do not expect this to influence our results in a significant way.

35 456

36 457

37 458 ***Conclusion***

38 459

39 460 All three SES constructs appear not to be associated with prevalence of CKD in urban  
40  
41 461 and rural Ghana except for wealth index in rural Ghana. The observed higher  
42  
43 462 prevalence of CKD in urban Ghana was not explained by the higher SES in urban  
44  
45 463 Ghana. Our study seems to suggest that other non-traditional factors such as  
46  
47 464 nephrotoxins, herbal medications, psychosocial stressors and misuse of over the  
48  
49 465 counter drugs may play a role and underscores the need to further explore these  
50  
51 466 factors.  
52

53 467  
54  
55  
56  
57  
58  
59  
60

## 468 **Acknowledgement**

469 The authors are very grateful to the research assistants, interviewers and other staff of the five research  
470 locations who took part in gathering the data and the Ghanaian volunteers in all the participating RODAM  
471 sites. We gratefully acknowledge the advisory board members for their valuable support in shaping the  
472 RODAM study methods and the Academic Medical Centre Biobank for their support in biobank  
473 management and high-quality storage of collected samples.

474

475

## 476 **Contributors**

477 My co-authors have all contributed substantially to this manuscript and approve of this  
478 submission. Research idea and study design: DNA, CA, KS, DA, EB, KM, JA; data acquisition  
479 and curation: DNA, CA, EB, KM, data analysis/interpretation: DNA, CA, KS, DA, EB, KM, LS,  
480 JA, EOD, KKG, FPM, ID, JS, SB, ADA; statistical analysis: DNA, CA, KS. DNA, CA, KS, DA,  
481 EB, KM, LS, JA, EOD, KKG, FPM, ID, JS, SB, ADA contributed important intellectual content  
482 during manuscript drafting or revision and accepts accountability for the overall work by  
483 ensuring that questions pertaining to the accuracy or integrity of any portion of the work are  
484 appropriately investigated and resolved. DNA and CA take responsibility that this study has been  
485 reported honestly, accurately, and transparently; that no important aspects of the study have been  
486 omitted; and that any discrepancies from the study as planned have been explained.

487

## 488 **Funding**

489

490 This work was supported by the European Commission under the Framework Programme (Grant  
491 Number: 278901). The funders had no role in study design, data collection and analysis, decision to  
492 publish, or preparation of the manuscript. The Wellcome Trust supported Professor Smeeth's  
493 contribution, grant number WT082178. Professor Joachim Spranger was supported by the DZHK  
494 (German Center for cardiovascular research) and the Berlin Institute of Health (BIH).

495 **Competing interest:** I have communicated with all my co-authors and obtained their full  
496 disclosures. My co-authors and I declare no conflicts of interest.

497

1  
2  
3 498 **Patient Consent:** None declared

4  
5 499

6  
7 500 **Ethics approval:** IRBs at each participating site.

8  
9 501

10 502 **Data sharing statement:** Data are available from the RODAM research cohort, a third

11  
12 503 party. Dr. Eric Beune affiliated with the RODAM research cohort and a co-author of this paper

13  
14 504 in accordance with the RODAM requirements for collaboration. Dr. Beune is the Data Collection

15  
16 505 Coordinator of RODAM and may be contacted with further questions (e.j.beune@amc.uva.nl).

17  
18 506 Additionally, researchers interested in further collaboration with RODAM may see the following

19 507 URL: <http://www.rod-am.eu/>

20  
21 508

22  
23 509

24  
25 510

26  
27 511

28  
29 512

30  
31 513

32  
33 514

34  
35 515

36  
37 516

38  
39 517

40  
41 518

42  
43 519

44  
45 520

46  
47 521

48  
49 522

50  
51 523

52  
53 524

54  
55 525

56  
57 526

58  
59 527

60 528

1  
2  
3  
4 529  
5 530  
6  
7 531  
8  
9 532  
10 533  
11  
12 534  
13  
14 535  
15 536  
16  
17 537  
18  
19 538  
20 539  
21  
22 540  
23 541  
24 542  
25 543  
26 544  
27 545  
28 546  
29 547  
30 548  
31 549  
32 550  
33 551  
34 552  
35 553  
36 554  
37 555  
38 556  
39 557  
40 558  
41 559  
42 560  
43 561  
44 562  
45 563  
46 564  
47 565  
48 566  
49 567  
50  
51  
52  
53  
54  
55  
56  
57  
58  
59  
60

## References

1. Patzer RE, McClellan WM. Influence of race, ethnicity and socioeconomic status on kidney disease. *Nature Reviews Nephrology* 2012;8(9):533-41.
2. Merkin SS, Roux AVD, Coresh J, et al. Individual and neighborhood socioeconomic status and progressive chronic kidney disease in an elderly population: The Cardiovascular Health Study. *Soc Sci Med* 2007;65(4):809-21.
3. Bello AK, Peters J, Rigby J, et al. Socioeconomic status and chronic kidney disease at presentation to a renal service in the United Kingdom. *Clin J Am Soc Nephrol* 2008;3(5):1316-23.
4. Crews DC, Charles RF, Evans MK, et al. Poverty, race, and CKD in a racially and socioeconomically diverse urban population. *Am J Kidney Dis* 2010;55(6):992-1000.
5. Shoham DA, Vupputuri S, Roux AVD, et al. Kidney disease in life-course socioeconomic context: the Atherosclerosis Risk in Communities (ARIC) Study. *Am J Kidney Dis* 2007;49(2):217-26.
6. Byrne C, Nedelman J, Luke RG. Race, socioeconomic status, and the development of end-stage renal disease. *Am J Kidney Dis* 1994;23(1):16-22.
7. Popkin BM. The shift in stages of the nutrition transition in the developing world differs from past experiences! *Public Health Nutr* 2002;5(1A):205-14.
8. Du S, Lu B, Zhai F, et al. A new stage of the nutrition transition in China. *Public Health Nutr* 2002;5(1a):169-74.
9. Kim S, Symons M, Popkin BM. Contrasting socioeconomic profiles related to healthier lifestyles in China and the United States. *Am J Epidemiol* 2004;159(2):184-91.
10. Adler NE, Ostrove JM. Socioeconomic status and health: what we know and what we don't. *Ann N Y Acad Sci* 1999;896(1):3-15.
11. Anderson NB, Armstead CA. Toward understanding the association of socioeconomic status and health: A new challenge for the biopsychosocial approach. *Psychosom Med* 1995;57(3):213-25.
12. Feinstein JS. The relationship between socioeconomic status and health: a review of the literature. *The Milbank Quarterly* 1993:279-322.

- 1  
2  
3 568 13. Samuel P, Antonisamy B, Raghupathy P, et al. Socio-economic status and cardiovascular risk  
4 569 factors in rural and urban areas of Vellore, Tamilnadu, South India. *Int J Epidemiol*  
5 570 2012;41(5):1315-27.  
6 571 14. Christie S, Fone DL. Does car ownership reflect socio-economic disadvantage in rural areas?  
7 572 A cross-sectional geographical study in Wales, UK. *Public Health* 2003;117(2):112-16.  
8 573 15. Agyemang C, Beune E, Meeks K, et al. Rationale and cross-sectional study design of the  
9 574 Research on Obesity and type 2 Diabetes among African Migrants: the RODAM study.  
10 575 *BMJ open* 2015;4(3):e004877.  
11 576 16. Addo J, Agyemang C, Aikins Ad-G, et al. Association between socioeconomic position and  
12 577 the prevalence of type 2 diabetes in Ghanaians in different geographic locations: the  
13 578 RODAM study. *J Epidemiol Community Health* 2017;jech-2016-208322.  
14 579 17. Adjei DN, Stronks K, Adu D, et al. Relationship between educational and occupational  
15 580 levels, and Chronic Kidney Disease in a multi-ethnic sample-The HELIUS study. *PLoS*  
16 581 *One* 2017;12(11):e0186460.  
17 582 18. Consultation WE. Waist circumference and waist-hip ratio. *Report of a WHO Expert*  
18 583 *Consultation Geneva: World Health Organization* 2008:8-11.  
19 584 19. Rutstein SO, Johnson K, MEASURE OM. The DHS wealth index: ORC Macro, MEASURE  
20 585 DHS 2004.  
21 586 20. Association AD. Standards of medical care in diabetes—2014. *Diabetes Care*  
22 587 2014;37(Supplement 1):S14-S80.  
23 588 21. Stevens LA, Schmid CH, Greene T, et al. Comparative performance of the CKD  
24 589 epidemiology collaboration (CKD-EPI) and the modification of diet in renal disease  
25 590 (MDRD) study equations for estimating GFR levels above 60 mL/min/1.73 m<sup>2</sup>. *Am J*  
26 591 *Kidney Dis* 2010;56(3):486-95.  
27 592 22. Eknoyan G, Lameire N, Eckardt K, et al. KDIGO 2012 clinical practice guideline for the  
28 593 evaluation and management of chronic kidney disease. *Kidney Int* 2013;3:5-14.  
29 594 23. KDIGO G. Work Group. KDIGO clinical practice guideline for glomerulonephritis. *Kidney*  
30 595 *inter, Suppl* 2012;2:139-274.  
31 596 24. Collins AJ, Foley RN, Herzog C, et al. US Renal Data System 2010 Annual Data Report.  
32 597 *American journal of kidney diseases: the official journal of the National Kidney*  
33 598 *Foundation* 2011;57(1 Suppl 1):A8, e1.  
34 599 25. Masthi NR, Gangaboraiah PK. An exploratory study on socio economic status scales in a  
35 600 rural and urban setting. *Journal of family medicine and primary care* 2013;2(1):69.  
36 601 26. Stanifer JW, Maro V, Egger J, et al. The epidemiology of chronic kidney disease in Northern  
37 602 Tanzania: a population-based survey. *PLoS One* 2015;10(4):e0124506.  
38 603 27. Bruce MA, Beech BM, Crook ED, et al. Association of socioeconomic status and CKD  
39 604 among African Americans: the Jackson Heart Study. *Am J Kidney Dis* 2010;55(6):1001-  
40 605 08.  
41 606 28. Braveman PA, Cubbin C, Egerter S, et al. Socioeconomic status in health research: one size  
42 607 does not fit all. *JAMA* 2005;294(22):2879-88.  
43 608 29. Gilthorpe MS, Wilson RC. Rural/urban differences in the association between deprivation  
44 609 and healthcare utilisation. *Soc Sci Med* 2003;57(11):2055-63.  
45 610 30. Choi AI, Weekley CC, Chen S-C, et al. Association of educational attainment with chronic  
46 611 disease and mortality: the Kidney Early Evaluation Program (KEEP). *Am J Kidney Dis*  
47 612 2011;58(2):228-34.  
48  
49  
50  
51  
52  
53  
54  
55  
56  
57  
58  
59  
60

- 1  
2  
3 613 31. Mackenbach JP, Cavelaars A, Kunst AE, et al. Socioeconomic inequalities in cardiovascular  
4 614 disease mortality. An international study. *Eur Heart J* 2000;21(14):1141-51.  
5 615 32. McKay L, Macintyre S, Ellaway A. Migration and health: a review of the international  
6 616 literature. MRC Social and Public Health Sciences Unit, Occasional Paper No. 12.  
7 617 *Glasgow: Medical Research Council[Links]* 2003  
8  
9 618  
10  
11 619  
12 620  
13 621  
14 622  
15 623  
16 624  
17 625  
18 626  
19 627  
20 628  
21 629

### 22 630 **Legend for figures**

23 631  
24 632 **Figure 1:** Prevalence of chronic kidney disease (CKD) across level of education among urban  
25 633 and rural participants. Definitions according to 2012 KDIGO (Kidney Disease: Improving Global  
26 634 Outcomes) guideline. CKD was defined as being in moderately increased risk, high-risk, or very  
27 635 high-risk groups.  
28 636  
29 637

30 638  
31 639 **Figure 2:** Prevalence of chronic kidney disease (CKD) across occupational status among urban  
32 640 and rural participants. Definitions according to 2012 KDIGO (Kidney Disease: Improving  
33 641 Global Outcomes) guideline. CKD was defined as being in moderately increased risk, high-risk,  
34 642 or very high-risk groups.  
35 643  
36 644

37 645  
38 646 **Figure 3:** Prevalence of chronic kidney disease (CKD) across wealth index categories among  
39 647 urban and rural participants. Definitions according to 2012 KDIGO (Kidney Disease: Improving  
40 648 Global Outcomes) guideline. CKD was defined as being in moderately increased risk, high-risk,  
41 649 or very high-risk groups.  
42 650  
43 651  
44 652  
45 653  
46 654

1  
2  
3  
4  
5  
6  
7  
8  
9  
10  
11  
12  
13  
14  
15  
16  
17  
18  
19  
20  
21  
22  
23  
24  
25  
26  
27  
28  
29  
30  
31  
32  
33  
34  
35  
36  
37  
38  
39  
40  
41  
42  
43  
44  
45  
46  
47  
48  
49  
50  
51  
52  
53  
54  
55  
56  
57  
58  
59  
60



Figure 1: Prevalence of chronic kidney disease (CKD) across level of education among urban and rural participants Definitions according to 2012 KDIGO (Kidney Disease: Improving Global Outcomes) guideline. CKD was defined as being in moderately increased risk, high-risk, or very high-risk groups

Figure 1: Prevalence of chronic kidney disease (CKD) across level of education among urban and rural participants Definitions according to 2012 KDIGO (Kidney Disease: Improving Global Outcomes) guideline. CKD was defined as being in moderately increased risk, high-risk, or very high-risk groups.

279x361mm (300 x 300 DPI)



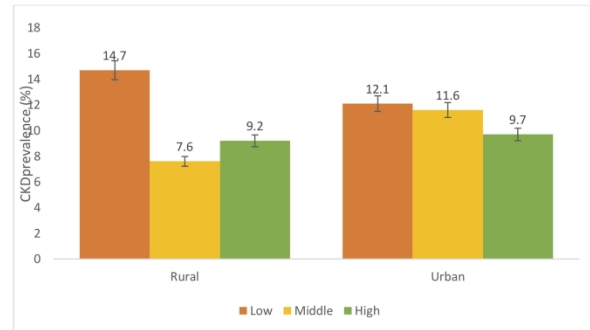

Figure 2: Prevalence of chronic kidney disease (CKD) across occupational status among urban and rural participants. Definitions according to 2012 KDIGO (Kidney Disease: Improving Global Outcomes) guideline. CKD was defined as being in moderately increased risk, high-risk, or very high-risk groups

Figure 2: Prevalence of chronic kidney disease (CKD) across occupational status among urban and rural participants. Definitions according to 2012 KDIGO (Kidney Disease: Improving Global Outcomes) guideline. CKD was defined as being in moderately increased risk, high-risk, or very high-risk groups.

279x361mm (300 x 300 DPI)

1  
2  
3  
4  
5  
6  
7  
8  
9  
10  
11  
12  
13  
14  
15  
16  
17  
18  
19  
20  
21  
22  
23  
24  
25  
26  
27  
28  
29  
30  
31  
32  
33  
34  
35  
36  
37  
38  
39  
40  
41  
42  
43  
44  
45  
46  
47  
48  
49  
50  
51  
52  
53  
54  
55  
56  
57  
58  
59  
60



Figure 3: Prevalence of chronic kidney disease (CKD) across wealth index categories among urban and rural participants. Definitions according to 2012 KDIGO (Kidney Disease: Improving Global Outcomes) guideline. CKD was defined as being in moderately increased risk, high-risk, or very high-risk groups

Figure 3: Prevalence of chronic kidney disease (CKD) across wealth index categories among urban and rural participants. Definitions according to 2012 KDIGO (Kidney Disease: Improving Global Outcomes) guideline. CKD was defined as being in moderately increased risk, high-risk, or very high-risk groups.

279x361mm (300 x 300 DPI)

## STROBE Statement—checklist of items that should be included in reports of observational studies

|                           | Item No. | Recommendation                                                                                                                  | Page No. | Relevant text from manuscript                                                                                                                                                                                                                                                                                                                                                             |
|---------------------------|----------|---------------------------------------------------------------------------------------------------------------------------------|----------|-------------------------------------------------------------------------------------------------------------------------------------------------------------------------------------------------------------------------------------------------------------------------------------------------------------------------------------------------------------------------------------------|
| <b>Title and abstract</b> | 1        | (a) Indicate the study's design with a commonly used term in the title or the abstract                                          | 1,2      | We have included a commonly used term in the title and abstract                                                                                                                                                                                                                                                                                                                           |
|                           |          | (b) Provide in the abstract an informative and balanced summary of what was done and what was found                             | 2        | Our study did not find any associations between SES indicators and CKD in both rural and urban Ghana after age and sex adjustment except in rural Ghana where wealth index was associated with prevalence of CKD. Consequently, the higher SES did not account for the increased rate of CKD among urban dwellers suggesting the need to identify other factors that may be driving this. |
| <b>Introduction</b>       |          |                                                                                                                                 |          |                                                                                                                                                                                                                                                                                                                                                                                           |
| Background/rationale      | 2        | Explain the scientific background and rationale for the investigation being reported                                            | 4        | The theoretical and scientific background as well as the rationale for conducting the study have been provided in the introduction section.                                                                                                                                                                                                                                               |
| Objectives                | 3        | State specific objectives, including any prespecified hypotheses                                                                | 4        | We assessed the association of SES with CKD in rural and urban Ghana and studied what extent the higher SES of people in urban areas could account for differences in CKD between rural and urban populations                                                                                                                                                                             |
| <b>Methods</b>            |          |                                                                                                                                 |          |                                                                                                                                                                                                                                                                                                                                                                                           |
| Study design              | 4        | Present key elements of study design early in the paper                                                                         | 5-6      | Details given in the methods                                                                                                                                                                                                                                                                                                                                                              |
| Setting                   | 5        | Describe the setting, locations, and relevant dates, including periods of recruitment, exposure, follow-up, and data collection | 5-6      | Rural or urban Ghana.                                                                                                                                                                                                                                                                                                                                                                     |

|                              |    |                                                                                                                                                                                                                                                                                                                                                                                                                                                                                    |     |                                                                                                                                       |
|------------------------------|----|------------------------------------------------------------------------------------------------------------------------------------------------------------------------------------------------------------------------------------------------------------------------------------------------------------------------------------------------------------------------------------------------------------------------------------------------------------------------------------|-----|---------------------------------------------------------------------------------------------------------------------------------------|
| Participants                 | 6  | <p>(a) <i>Cohort study</i>—Give the eligibility criteria, and the sources and methods of selection of participants. Describe methods of follow-up</p> <p><i>Case-control study</i>—Give the eligibility criteria, and the sources and methods of case ascertainment and control selection. Give the rationale for the choice of cases and controls</p> <p><i>Cross-sectional study</i>—Give the eligibility criteria, and the sources and methods of selection of participants</p> | 6-8 | A multi-centre cross-sectional study was conducted among Ghanaian adults (n=2492) aged 25-70 years residing in rural and urban Ghana. |
|                              |    | <p>(b) <i>Cohort study</i>—For matched studies, give matching criteria and number of exposed and unexposed</p> <p><i>Case-control study</i>—For matched studies, give matching criteria and the number of controls per case</p>                                                                                                                                                                                                                                                    |     |                                                                                                                                       |
| Variables                    | 7  | Clearly define all outcomes, exposures, predictors, potential confounders, and effect modifiers. Give diagnostic criteria, if applicable                                                                                                                                                                                                                                                                                                                                           | 6-8 | The main outcomes have been clearly defined.                                                                                          |
| Data sources/<br>measurement | 8* | For each variable of interest, give sources of data and details of methods of assessment (measurement). Describe comparability of assessment methods if there is more than one group                                                                                                                                                                                                                                                                                               | 6-8 | We defined each variable of interest in the methods accordingly                                                                       |
| Bias                         | 9  | Describe any efforts to address potential sources of bias                                                                                                                                                                                                                                                                                                                                                                                                                          | 18  | Potential sources of bias have discussed in the discussion section                                                                    |
| Study size                   | 10 | Explain how the study size was arrived at                                                                                                                                                                                                                                                                                                                                                                                                                                          | 5   | Given in the methods section and we have also referred to the RODAM study methods paper                                               |

Continued on next page

|                        |     |                                                                                                                                                                                                                                                                                                           |       |                                                                                              |
|------------------------|-----|-----------------------------------------------------------------------------------------------------------------------------------------------------------------------------------------------------------------------------------------------------------------------------------------------------------|-------|----------------------------------------------------------------------------------------------|
| Quantitative variables | 11  | Explain how quantitative variables were handled in the analyses. If applicable, describe which groupings were chosen and why                                                                                                                                                                              | 8-9   | Please see methods                                                                           |
| Statistical methods    | 12  | (a) Describe all statistical methods, including those used to control for confounding                                                                                                                                                                                                                     | 8-9   | Please see methods                                                                           |
|                        |     | (b) Describe any methods used to examine subgroups and interactions                                                                                                                                                                                                                                       | 8-9   | Please see methods                                                                           |
|                        |     | (c) Explain how missing data were addressed                                                                                                                                                                                                                                                               | 8-9   |                                                                                              |
|                        |     | (d) <i>Cohort study</i> —If applicable, explain how loss to follow-up was addressed<br><i>Case-control study</i> —If applicable, explain how matching of cases and controls was addressed<br><i>Cross-sectional study</i> —If applicable, describe analytical methods taking account of sampling strategy | NA    | We have reported non-response across sites                                                   |
|                        |     | (e) Describe any sensitivity analyses                                                                                                                                                                                                                                                                     | NA    |                                                                                              |
| <b>Results</b>         |     |                                                                                                                                                                                                                                                                                                           |       |                                                                                              |
| Participants           | 13* | (a) Report numbers of individuals at each stage of study—eg numbers potentially eligible, examined for eligibility, confirmed eligible, included in the study, completing follow-up, and analysed                                                                                                         | 5     | Non-response analysis was done to shed light on the differential response rates across sites |
|                        |     | (b) Give reasons for non-participation at each stage                                                                                                                                                                                                                                                      | 5     |                                                                                              |
|                        |     | (c) Consider use of a flow diagram                                                                                                                                                                                                                                                                        | 5     | We have also referred to RODAM methods paper                                                 |
| Descriptive data       | 14* | (a) Give characteristics of study participants (eg demographic, clinical, social) and information on exposures and potential confounders                                                                                                                                                                  | 5     | We have also referred to RODAM methods paper                                                 |
|                        |     | (b) Indicate number of participants with missing data for each variable of interest                                                                                                                                                                                                                       | 5     | We have also referred to RODAM methods paper                                                 |
|                        |     | (c) <i>Cohort study</i> —Summarise follow-up time (eg, average and total amount)                                                                                                                                                                                                                          | NA    |                                                                                              |
| Outcome data           | 15* | <i>Cohort study</i> —Report numbers of outcome events or summary measures over time                                                                                                                                                                                                                       | NA    |                                                                                              |
|                        |     | <i>Case-control study</i> —Report numbers in each exposure category, or summary measures of exposure                                                                                                                                                                                                      | NA    |                                                                                              |
|                        |     | <i>Cross-sectional study</i> —Report numbers of outcome events or summary measures                                                                                                                                                                                                                        | 9-10  | Summary measures are given in the results section and in tables and figures                  |
| Main results           | 16  | (a) Give unadjusted estimates and, if applicable, confounder-adjusted estimates and their precision (eg, 95% confidence interval). Make clear which confounders were adjusted for and why they were included                                                                                              | 12-16 | Unadjusted and adjusted estimates are given in the results section and in figures            |
|                        |     | (b) Report category boundaries when continuous variables were categorized                                                                                                                                                                                                                                 | 12-16 | We have provided mean and corresponding standard deviations for the continuous variables.    |

|                          |    |                                                                                                                                                                            |       |                                                                                                                                                  |
|--------------------------|----|----------------------------------------------------------------------------------------------------------------------------------------------------------------------------|-------|--------------------------------------------------------------------------------------------------------------------------------------------------|
|                          |    | (c) If relevant, consider translating estimates of relative risk into absolute risk for a meaningful time                                                                  | NA    |                                                                                                                                                  |
|                          |    | Continued on next page                                                                                                                                                     |       |                                                                                                                                                  |
| Other analyses           | 17 | Report other analyses done—eg analyses of subgroups and interactions, and sensitivity analyses                                                                             | NA    |                                                                                                                                                  |
| <b>Discussion</b>        |    |                                                                                                                                                                            |       |                                                                                                                                                  |
| Key results              | 18 | Summarise key results with reference to study objectives                                                                                                                   | 8     |                                                                                                                                                  |
| Limitations              | 19 | Discuss limitations of the study, taking into account sources of potential bias or imprecision. Discuss both direction and magnitude of any potential bias                 | 18    | Key limitations regarding study methods including differential response rates and sampling methods in the various study sites have been provided |
| Interpretation           | 20 | Give a cautious overall interpretation of results considering objectives, limitations, multiplicity of analyses, results from similar studies, and other relevant evidence | 17-18 | Cautious overall interpretation of the key findings have been provided.                                                                          |
| Generalisability         | 21 | Discuss the generalisability (external validity) of the study results                                                                                                      | 17-18 |                                                                                                                                                  |
| <b>Other information</b> |    |                                                                                                                                                                            |       |                                                                                                                                                  |
| Funding                  | 22 | Give the source of funding and the role of the funders for the present study and, if applicable, for the original study on which the present article is based              | 19    | The funders had no role in study design, data collection and analysis, decision to publish, or preparation of the manuscript                     |

\*Give information separately for cases and controls in case-control studies and, if applicable, for exposed and unexposed groups in cohort and cross-sectional studies.

**Note:** An Explanation and Elaboration article discusses each checklist item and gives methodological background and published examples of transparent reporting. The STROBE checklist is best used in conjunction with this article (freely available on the Web sites of PLoS Medicine at <http://www.plosmedicine.org/>, Annals of Internal Medicine at <http://www.annals.org/>, and Epidemiology at <http://www.epidem.com/>). Information on the STROBE Initiative is available at [www.strobe-statement.org](http://www.strobe-statement.org).

# BMJ Open

## A CROSS-SECTIONAL STUDY OF ASSOCIATION BETWEEN SOCIOECONOMIC INDICATORS AND CHRONIC KIDNEY DISEASE IN RURAL-URBAN GHANA: THE RODAM STUDY

|                                 |                                                                                                                                                                                                                                                                                                                                                                                                                                                                                                                                                                                                                                                                                                                                                                                                                                                                                                                                                                                                                                                                                                                                                                                                                                                                                                                                                                                                                                                                                                                                                                                          |
|---------------------------------|------------------------------------------------------------------------------------------------------------------------------------------------------------------------------------------------------------------------------------------------------------------------------------------------------------------------------------------------------------------------------------------------------------------------------------------------------------------------------------------------------------------------------------------------------------------------------------------------------------------------------------------------------------------------------------------------------------------------------------------------------------------------------------------------------------------------------------------------------------------------------------------------------------------------------------------------------------------------------------------------------------------------------------------------------------------------------------------------------------------------------------------------------------------------------------------------------------------------------------------------------------------------------------------------------------------------------------------------------------------------------------------------------------------------------------------------------------------------------------------------------------------------------------------------------------------------------------------|
| Journal:                        | <i>BMJ Open</i>                                                                                                                                                                                                                                                                                                                                                                                                                                                                                                                                                                                                                                                                                                                                                                                                                                                                                                                                                                                                                                                                                                                                                                                                                                                                                                                                                                                                                                                                                                                                                                          |
| Manuscript ID                   | bmjopen-2018-022610.R3                                                                                                                                                                                                                                                                                                                                                                                                                                                                                                                                                                                                                                                                                                                                                                                                                                                                                                                                                                                                                                                                                                                                                                                                                                                                                                                                                                                                                                                                                                                                                                   |
| Article Type:                   | Research                                                                                                                                                                                                                                                                                                                                                                                                                                                                                                                                                                                                                                                                                                                                                                                                                                                                                                                                                                                                                                                                                                                                                                                                                                                                                                                                                                                                                                                                                                                                                                                 |
| Date Submitted by the Author:   | 15-Feb-2019                                                                                                                                                                                                                                                                                                                                                                                                                                                                                                                                                                                                                                                                                                                                                                                                                                                                                                                                                                                                                                                                                                                                                                                                                                                                                                                                                                                                                                                                                                                                                                              |
| Complete List of Authors:       | <p>Adjei Nana, David ; University of Ghana, Department of Medical Laboratory Sciences; University of Amsterdam, Department of Public Health</p> <p>Stronks, Karien; Academic Medical Center , Department of Public Health</p> <p>Adu, Dwomoa; Korle-bu Teaching Hospital, Department of Medicine</p> <p>Beune, Erik; AMC</p> <p>Meeks, Karlijn; AMC, Public Health</p> <p>Smeeth, Liam; London School of Hygiene and Tropical Medicine, Addo, Juliet; London School of Hygiene and Tropical Medicine, Non Communicable Disease Epidemiology</p> <p>Owusu-Dabo, Ellis; Kwame Nkrumah University of Science and Technology, Kumasi Centre for Collaborative Research in Tropical Medicine</p> <p>Klipstein-Grobusch, Kerstin; 1 Julius Global Health, Julius Center for Health Sciences and Primary Care, University Medical Centre Utrecht, Utrecht, The Netherlands</p> <p>Mockenhaupt, Frank; Charité – University Medicine, Berlin, Institute of Tropical Medicine and International Health</p> <p>Danquah, Ina; German Institute of Human Nutrition, Molecular Epidemiology; Charite Universitätsmedizin Berlin, Institute for Social Medicine, Epidemiology and Health Economy</p> <p>Spranger, Joachim; Department of Endocrinology and Metabolism, 1. Charité-University Medicine Berlin, Berlin, Germany.</p> <p>Bahendeka, Silver; 1. MKPGMS - Uganda Martyrs University</p> <p>De-Graft Aikins, Ama; University of Ghana, Regional Institute for Population Studies</p> <p>Agyemang, Charles; Academic Medical centre, University of Amsterdam, Department of Public Health</p> |
| <b>Primary Subject Heading</b>: | Epidemiology                                                                                                                                                                                                                                                                                                                                                                                                                                                                                                                                                                                                                                                                                                                                                                                                                                                                                                                                                                                                                                                                                                                                                                                                                                                                                                                                                                                                                                                                                                                                                                             |
| Secondary Subject Heading:      | Public health, Epidemiology                                                                                                                                                                                                                                                                                                                                                                                                                                                                                                                                                                                                                                                                                                                                                                                                                                                                                                                                                                                                                                                                                                                                                                                                                                                                                                                                                                                                                                                                                                                                                              |
| Keywords:                       | Chronic Kidney Disease, Socioeconomic status, Health inequalities, RODAM study, rural, urban                                                                                                                                                                                                                                                                                                                                                                                                                                                                                                                                                                                                                                                                                                                                                                                                                                                                                                                                                                                                                                                                                                                                                                                                                                                                                                                                                                                                                                                                                             |
|                                 |                                                                                                                                                                                                                                                                                                                                                                                                                                                                                                                                                                                                                                                                                                                                                                                                                                                                                                                                                                                                                                                                                                                                                                                                                                                                                                                                                                                                                                                                                                                                                                                          |

1  
2  
3  
4  
5  
6  
7  
8  
9  
10  
11  
12  
13  
14  
15  
16  
17  
18  
19  
20  
21  
22  
23  
24  
25  
26  
27  
28  
29  
30  
31  
32  
33  
34  
35  
36  
37  
38  
39  
40  
41  
42  
43  
44  
45  
46  
47  
48  
49  
50  
51  
52  
53  
54  
55  
56  
57  
58  
59  
60





**A CROSS-SECTIONAL STUDY OF ASSOCIATION BETWEEN  
SOCIOECONOMIC INDICATORS AND CHRONIC KIDNEY DISEASE IN  
RURAL-URBAN GHANA: THE RODAM STUDY**

David N. Adjei, MSc, PhD<sup>1,2</sup>; Karien Stronks, MSc, PhD<sup>1</sup>; Dwomoa Adu, MD<sup>3</sup>; Erik Beune, MSc, PhD<sup>1</sup>; Karlijn Meeks, MSc, PhD<sup>1</sup>; Liam Smeeth, MD, PhD<sup>4</sup>; Juliet, Addo, MD, PhD<sup>4</sup>; Ellis Owusu-Dabo, MSc, PhD<sup>5</sup>; Kerstin Klipstein-Grobusch, MSc, PhD<sup>6,7</sup>; Frank P. Mockenhaupt, MD, PhD<sup>8</sup>; Ina, Danquah, MSc, PhD<sup>9,10</sup>; Joachim, Spranger, MD, PhD<sup>11,12,13</sup>; Silver Bahendeka, MD, PhD<sup>14</sup>; Ama de-Graft, Aikins, MSc, PhD<sup>15</sup>; Charles Agyemang, MPH, PHD<sup>1</sup>

1. Department of Public Health, Academic Medical Center, University of Amsterdam, Amsterdam Public Health Research Institute, Amsterdam, The Netherlands.
2. Department of Medical Laboratory Sciences, School of Biomedical and Allied Health Sciences, College of Health Sciences, University of Ghana, Accra, Ghana.
3. Department of Medicine, School of Medicine and Dentistry, University of Ghana and Korle-Bu Teaching Hospital, Accra, Ghana.
4. Department of Non-Communicable Disease Epidemiology, London School of Hygiene and Tropical Medicine, London, United Kingdom.
5. Kumasi Centre for Collaborative Research, KNUST, Kumasi, Ghana
6. Julius Global Health, Julius Center for Health Sciences and Primary Care, University Medical Centre, Utrecht University, The Netherlands.
7. Division of Epidemiology & Biostatistics, School of Public Health, Faculty of Health Sciences, University of the Witwatersrand, Johannesburg, South Africa.
8. Institute of Tropical Medicine and International Health, Charité–University Medicine Berlin, Augustenburger Platz 1, 13353 Berlin, Germany.
9. Department of Molecular Epidemiology, German Institute of Human Nutrition Potsdam-Rehbrücke, Nuthetal, Germany.
10. Charité - Universitaetsmedizin Berlin, Institute for Social Medicine, Epidemiology and Health Economics, Berlin, Germany.
11. Department of Endocrinology and Metabolism, Charité-University Medicine Berlin, Berlin, Germany.
12. German Centre for Cardiovascular Research (DZHK), Berlin, Germany.
13. Center for Cardiovascular Research (CCR), Charité-University Medicine Berlin, Berlin, Germany.
14. MKPGMS - Uganda Martyrs University, Kampala, Uganda.
15. Regional Institute for Population Studies, University of Ghana, Legon, Ghana.

1  
2  
3  
4  
5  
6  
7  
8  
9  
10  
11  
12  
13  
14  
15  
16  
17  
18  
19  
20  
21  
22  
23  
24  
25  
26  
27  
28  
29  
30  
31  
32  
33  
34  
35  
36  
37  
38  
39  
40  
41  
42  
43  
44  
45  
46  
47  
48  
49  
50  
51  
52  
53  
54  
55  
56  
57  
58  
59  
60

38 Address correspondence to David Nana Adjei, MSc, PhD. Department of Public Health,  
39 Academic Medical Centre, University of Amsterdam, Meibergdreef 9, 1105 AZ Amsterdam, the  
40 Netherlands. Department of Medical Laboratory Sciences, School of Biomedical and Allied  
41 Health Sciences, University of Ghana, E-mail: [dna@chs.edu.gh](mailto:dna@chs.edu.gh), [d.n.adjei@amc.uva.nl](mailto:d.n.adjei@amc.uva.nl), Tel:  
42 +233236717850

For peer review only

1  
2  
3 **85 Abstract**  
4 **86**

5 **87 Objectives:** Studies from high income countries suggest higher prevalence of Chronic Kidney Disease  
6 **88 (CKD)** among individuals in low socio-economic groups. However, some studies from low and middle-  
7 **89 income** countries (LMICs) show the reverse pattern among those in high socioeconomic groups. It is  
8 **90 unknown** which pattern applies to individuals living in rural and urban Ghana. We assessed the  
9 **91 association** between Socio-Economic Status (SES) indicators and CKD in rural and urban Ghana and to  
10 **92 what** extent the higher SES of people in urban areas of Ghana could account for differences in CKD  
11 **93 between** rural and urban populations.  
12 **94**

13 **95 Setting:** The study was conducted in Ghana (Ashanti region). We used baseline data from a  
14 **96 multi-centre** Research on Obesity and Diabetes among African Migrants (RODAM)  
15 **97 study.**  
16 **98**

17 **99 Participants:** The sample consisted of 2492 adults (Rural Ghana, 1043, Urban Ghana, 1,449) aged 25 to  
18 **100 70** years living in Ghana.  
19 **101**

20 **102 Exposure:** Educational level, occupational level and wealth index.  
21 **103**

22 **104 Outcome:** Three CKD outcomes were considered using the 2012 KDIGO (Kidney Disease: Improving  
23 **105 Global** Outcomes) severity of CKD classification: albuminuria, reduced glomerular filtration rate and  
24 **106 high** to very high CKD risk based on the combination of these two.  
25 **107**

26 **108 Results:** All three SES indicators were not associated with CKD in both rural and urban Ghana after age  
27 **109 and** sex adjustment except for rural Ghana where high wealth index was significantly associated with  
28 **110 higher** odds of reduced eGFR (AOR, 2.38; 95% C.I. 1.03-5.47). The higher rate of CKD observed in  
29 **111 urban** Ghana was not explained by the higher SES of that population.  
30 **112**

31 **113 Conclusion:** SES indicators were not associated with prevalence of CKD except for wealth index and  
32 **114 reduced** eGFR in rural Ghana. Consequently, the higher SES of urban Ghana did not account for the  
33 **115 increased** rate of CKD among urban dwellers suggesting the need to identify other factors that may be  
34 **116 driving** this.  
35 **117**

36 **118 Index Words:** Chronic kidney disease; socioeconomic status; health inequalities; risk factor; ethnic  
37 **119 minority** groups; migrants; RODAM study, Ghana  
38 **120**  
39 **121**  
40 **122**  
41 **123**  
42 **124**  
43 **125**  
44 **126**  
45 **127**  
46 **128**

1  
2  
3  
4 129  
5 130  
6  
7 131  
8  
9 132  
10 133  
11  
12 134  
13  
14 135  
15 136  
16  
17 137  
18 138  
19  
20 139  
21  
22 140  
23  
24 141  
25 142  
26  
27 143  
28  
29 144  
30 145  
31  
32 146  
33 147  
34  
35 148  
36 149  
37  
38 150  
39  
40 151  
41 152  
42  
43 153  
44  
45 154  
46 155  
47  
48 156  
49  
50 157  
51 158  
52  
53 159  
54  
55 160  
56  
57  
58  
59  
60

### Strengths and limitation of the study

- The use of well-standardized study protocols across rural and urban Ghana eliminated intra protocol variability.
- Our study is also the first in Africa to use all three categories of CKD definitions (albuminuria, reduced eGFR and CKD risk) by KDIGO 2012 in assessing association of SES with CKD in rural and urban setting. This provides more detailed information on CKD outcomes.
- The limitation of intra laboratory variability in earlier studies was eliminated using the same standard operating procedures in the same laboratory for running all samples for both rural and urban Ghana.
- The use of three constructs of SES (educational level, occupational level and wealth index) in this study also provides a much better holistic approach to assessing SES associations with CKD.
- Our study was limited because of the use of cross sectional design which prevented us from determining causality between predictors and CKD progression.

1  
2  
3  
4 161  
5 162  
6  
7 163  
8  
9 164  
10 165  
11 166  
12 166  
13 167  
14 167  
15 168  
16  
17 169  
18  
19 170  
20 171  
21  
22 172  
23  
24 173  
25 174  
26  
27 175  
28  
29 176  
30  
31 177  
32 178  
33 179  
34 180  
35 180  
36 181  
37 181  
38 182  
39  
40  
41 183  
42  
43 184  
44  
45 185  
46 185  
47  
48 186  
49 186  
50  
51 187  
52 187  
53  
54 188  
55  
56  
57  
58  
59  
60

## Introduction

In general, individuals in lower socio-economic status (SES) groups have been shown to suffer more frequently from Chronic Kidney Disease (CKD), often progressing to End Stage Renal Disease (ESRD), and associated with inadequate dialysis treatment, reduced access to kidney transplantation and poor health outcomes <sup>1</sup>. Recent studies have consistently found low SES to be associated with higher risk of CKD among people of African origin <sup>2-5</sup>.

However, in some settings the well-known inverse association between SES and CKD seems to be absent, or even reversed. For example, Bryne et al. did not find any association between SES and End Stage Renal Disease <sup>6</sup>. Other studies have found a positive association between SES and CKD <sup>7 8</sup>. Specifically, as SES improved, unhealthful lifestyle (unhealthy diet, physical inactivity, smoking and alcohol consumption) increased in China while that of the United States decreased with

1  
2  
3  
4 189 improved SES<sup>9</sup>. People with higher incomes, in these contexts, can afford a western  
5  
6 190 lifestyle, which is more readily available in the urban areas than in the rural areas.  
7  
8 191 There is therefore an interaction between individual SES and environmental factors,  
9  
10  
11 192 such as food, alcohol, smoking and sedentary life style in such populations<sup>10-12</sup>.  
12  
13  
14 193 Consequently, in those settings, people with a higher SES might have higher CKD  
15  
16 194 risk.

17  
18 195 In urban areas, the population in general has higher SES than in rural areas<sup>13</sup>. For example, individuals  
19  
20 196 with higher educational level migrate from rural areas to find higher occupations matching their higher  
21  
22 197 education to improve on their wealth. If indeed a positive association between SES and CKD is observed  
23  
24 198 in LMICs, this might underlie the well-known health differences between urban and rural areas, with  
25  
26 199 urban areas having an increased risk of CKD<sup>14</sup>. So far, it is unknown whether the reversed SES gradient  
27  
28 200 (higher risk in high SES group) might explain the higher burden of CKD in urban areas as compared to  
29  
30 201 rural areas in Africa.

31 202  
32 203 In view of this, we assessed the association of SES with CKD in rural and urban Ghana and studied the  
33  
34 204 extent to which the higher SES of people in urban areas could account for differences in CKD between  
35  
36 205 rural and urban populations.

37 206

38 207

39 208

40 209

41 210

42 211

## 43 212 **Methods**

44 213

### 45 214 *Study population and study design*

46 215 In the present analyses, data from the RODAM (Research on Obesity & Diabetes  
47  
48 216 among African Migrants) study, a multi-centre cross-sectional study were used. The  
49  
50  
51  
52  
53  
54  
55  
56  
57  
58  
59  
60

1  
2  
3 217 rationale, conceptual framework, design and methodology of the RODAM study have  
4  
5  
6 218 been described in detail elsewhere<sup>15 16</sup>. As the Healthy Life in an Urban Setting  
7  
8 219 (HELIUS) study conducted among Ghanaian migrants living in Amsterdam did not find any  
9  
10 220 associations between SES and CKD<sup>17</sup> the current study focused on rural and urban Ghana (Ashanti  
11  
12 221 region of Ghana). The RODAM study was conducted from 2012 to 2015 and it comprised  
13  
14 222 of individuals aged 25-70 years living in rural and urban Ghana and Ghanaian  
15  
16 223 migrants in Europe. All participants below 25 and above 70 years were excluded in  
17  
18 224 the present analyses. The present analysis was restricted to the rural and urban sites  
19  
20 225 (n=2492) RODAM participants. Specifically, 1043 participants from rural Ghana and  
21  
22 226 1449 from urban Ghana were used in this study.  
23  
24  
25

26 227  
27 228 Data collection for the study was standardized across all sites. Written informed  
28  
29 229 consent was obtained from each participant prior to enrolment in the study. The  
30  
31 230 respective ethics committees in Ghana and the three European countries approved the  
32  
33 231 study protocols before data collection began. Specifically, we obtained ethical clearance  
34  
35 232 in Ghana from School of Medical Sciences/Komfo Anokye Teaching Hospital  
36  
37 233 Committee on Human Research, Publication & Ethical Review Board. In the  
38  
39 234 Netherlands, the Institutional Review Board of the AMC, University of Amsterdam gave  
40  
41 235 approval for the study. In Germany, approval for the study was obtained from the  
42  
43 236 Ethics Committee of Charite-Universitätsmedizin. The London School of Hygiene and  
44  
45 237 Tropical Medicine Research Ethics Committee gave approval for the study in the UK.  
46  
47  
48  
49  
50

51 238 The response rate was 76% in rural Ghana and 74% in urban Ghana. In Ghana,  
52  
53 239 participants were randomly drawn from a list of 30 enumeration areas in the Ashanti  
54  
55  
56  
57  
58  
59  
60

1  
2  
3 240 region based on the 2010 population census using the multistage random sampling.  
4  
5  
6 241 These enumeration areas came from two purposively selected urban cities (Kumasi  
7  
8 242 and Obuasi) and 15 randomly selected rural communities in the Ashanti region.  
9  
10 243 Selected health and community authorities were first identified, notified of the study  
11  
12 244 and letters were sent giving detailed explanation of the study. We sent team members  
13  
14  
15 245 to stay among the communities to familiarize with them and organize mini clinics in  
16  
17 246 the field. This lasted between 1-2 weeks depending on the sampled population and  
18  
19  
20 247 responsiveness of respondents.  
21

22  
23 248 In Ghana, questionnaires administration and physical examination were done at the  
24  
25 249 same day/time. The participants were instructed to fast from 10.00pm the night before  
26  
27 250 the physical examination. For the current study, 2566 participants with data available  
28  
29  
30 251 on both questionnaire data and physical measurements were used. We excluded  
31  
32 252 (n=74) individuals outside the RODAM age range of 25-70 years resulting in a data  
33  
34 253 set of 2492 for analysis. These comprised 1,449 Urban Ghana and 1043 Rural Ghana.  
35  
36  
37 254 For the final analysis, individuals with no data on CKD status (n=42) were excluded.  
38

## 39 255 **Measurements**

## 40 256 **Covariates**

### 41 257 *Demographic and lifestyle factors*

42  
43  
44 258 Information on demographics, educational level, occupational level, wealth index and lifestyle factors  
45  
46  
47 259 (smoking and physical activity) were obtained by questionnaire. Physical examinations were performed  
48  
49  
50 260 with validated devices per standardized operational procedures across all study sites. Weight was  
51  
52 261 measured in light clothing and without shoes with SECA 877 scales to the nearest 0.1 kg. Height was  
53  
54 262 measured without shoes with a portable stadiometer (SECA 217) to the nearest 0.1cm. Body mass index  
55  
56 263 (BMI) was calculated as weight (kg) divided by height squared (m<sup>2</sup>). Overweight was defined as BMI of  
57  
58  
59  
60



1  
2  
3 264  $\geq 25$  to  $< 30$  kg/m<sup>2</sup> and obesity as BMI  $\geq 30$  kg/m<sup>2</sup> <sup>18</sup>. Per participant, all anthropometrics were measured  
4  
5 265 twice by the same assessor and the average of the two measurements were used for analyses.  
6

7 266 ***Predictor: SES***  
8

9  
10 267 Socioeconomic indicators used in this study were educational level, occupational status and level of  
11 268 wealth index. Educational level was determined based on self-reported highest educational qualification  
12  
13 269 accomplished based on the Ghanaian educational system. Occupational level was determined based on  
14  
15 270 self-reported current occupation if employed and/or last occupation before retirement or student. The  
16  
17 271 reported occupations were further coded according to the International Standard Classification of  
18  
19 272 Occupations scheme (ISCO-08). Where ‘high’ (professionals, managers, clerical support staff, higher  
20  
21 273 grade routine non-manual employees service and sales-related occupations) and ‘low’ (craft and related  
22  
23 274 trades workers, elementary occupations and farmers) and the rest were categorized into the ‘middle’.  
24  
25 275 Wealth index was determined using the World Health Organization (WHO) standard of wealth index  
26  
27 276 classification. Wealth index was based on data collected in the Household Questionnaire. The  
28  
29 277 questionnaire comprised of questions on household’s ownership of several consumer items such as  
30  
31 278 television, car, flooring material, toilet facilities etc. Each household was assigned a standard score for  
32  
33 279 each asset. Wealth index was then expressed in five categories. The five categories were further  
34  
35 280 categorized into three categories by combining the second and third as well as fourth and fifth categories  
36  
37 281 due to small numbers <sup>19</sup>. All three SES constructs were further classified as low, medium and high SES  
38  
39 282 and their relationship to each other tested. A composite SES variable (SES) was generated based on the  
40  
41 283 three SES constructs (education, occupation and wealth index) using the EGEN group command in  
42  
43 284 STATA. The codes were combined into numerical variables and their averages computed. The resultant  
44  
45 285 values were recoded into three categories (low, medium and high).  
46

47 286 ***Co-morbidity factors***  
48

49 287 Blood pressure (BP) was measured three times using a validated semi-automated device (The Microlife  
50  
51 288 WatchBP home) with appropriate cuffs in a sitting position after at least 5 min rest. The mean of the last  
52  
53 289 two BP measurements was used in the analyses. Hypertension was defined as systolic BP  $\geq 140$  mmHg,  
54  
55 290 and/or diastolic BP  $\geq 90$  mmHg, and/or being on antihypertensive medication treatment, and/or self-  
56  
57 291 reported hypertension. Trained research assistants in the two sites collected fasting venous blood samples.  
58  
59 292 All the blood samples were processed and aliquoted immediately (within one hour to maximum three  
60  
293 hours of the vena puncture) after collection per standard operation procedures, and then temporarily  
294  
295 stored at the local research location at  $-20^{\circ}\text{C}$ . The separated samples were then transported to the local  
research centres laboratories, where they were checked, registered and stored at  $-80^{\circ}\text{C}$ . To avoid intra-

laboratory variability, the stored blood samples from the local research centres were transported to Berlin, Germany for biochemical analyses. Fasting plasma glucose concentration was measured using an enzymatic method (hexokinase). Type 2 diabetes was defined according to the WHO diagnostic criteria (fasting glucose  $\geq 7.0$  mmol/L, and/or current use of medication prescribed to treat diabetes, and/or self-reported diabetes) <sup>20</sup>. Concentration of total cholesterol was assessed using colorimetric test kits. All biochemical analyses were performed using an ABX Pentra 400 chemistry analyzer (ABX Pentra; Horiba ABX, Germany). Hypercholesterolemia was defined as total cholesterol level  $\geq 6.22$  mmol/L. Serum creatinine concentration (in  $\mu\text{mol/L}$ ) was determined by a kinetic colorimetric spectrophotometric isotope dilution mass spectrometry-calibrated method (Roche Diagnostics). Biochemical analyses were subject to extensive quality checks including blinded serial measurements.

### **Outcome: CKD prevalence**

Participants were asked to bring an early morning urine sample for the analyses of albuminuria and creatinine levels. Urinary albumin concentration (in mg/L) was measured by an immunochemical turbidimetric method (Roche Diagnostics). Urinary creatinine concentration (in  $\mu\text{mol/L}$ ) was measured by a kinetic spectrophotometric method (Roche Diagnostics). Estimated glomerular filtration rate (eGFR) was calculated using the CKDEPI (CKD Epidemiology Collaboration) creatinine equation <sup>21</sup>. Urinary albumin-creatinine ratio (ACR; expressed in mg/g) was calculated by taking the ratio between urinary albumin and urinary creatinine. eGFR and albuminuria were categorized according to the 2012 KDIGO (Kidney Disease: Improving Global Outcomes) classification <sup>22</sup>. eGFR was categorized as follows: G1,  $\geq 90$  mL/min/1.73 m<sup>2</sup> (normal kidney function); G2, 60 to 89 mL/min/1.73 m<sup>2</sup> (mildly decreased); G3a, 45 to 59 mL/min/1.73 m<sup>2</sup> (mildly to moderately decreased); G3b, 30 to 44 mL/min/1.73 m<sup>2</sup> (moderately to severely decreased); G4, 15 to 29 mL/min/1.73 m<sup>2</sup> (severely decreased); and G5,  $< 15$  mL/min/1.73 m<sup>2</sup> (kidney failure). Albuminuria categories were derived from ACR and were as follows: A1,  $< 3$  mg/mmol (normal to mildly increased); A2, 3 to 30 mg/mmol (moderately increased); and A3,  $> 30$  mg/mmol (severely increased). CKD status was categorized according to severity of kidney disease (green, low risk; yellow, moderately increased risk; orange, high risk; and red, very high risk) using the combination of eGFR (G1-G5) and albuminuria (A1-A3) levels defined by the 2012 KDIGO guideline <sup>23</sup>. Due to the small number of participants in the very high risk category of CKD, high and very high risk groups were combined. Reduced eGFR was defined as eGFR  $< 60$  mL/min/1.73 m<sup>2</sup>. Because of the small number of participants in the severely increased albuminuria category, we defined albuminuria as ACR  $\geq 3$  mg/mmol by combining the moderately increased (A2) and severely increased (A3) categories.

### **Patient and Public Involvement**

1  
2  
3 328 Community leaders were involved in the recruitment of patients. These comprised of religious  
4 329 communities (churches and mosques), endorsement from local key leaders and establishing relationships  
5 330 with healthcare organizations. We also provided information on the study by involving the local media  
6 331 (radio and television stations). We sent letters to all selected health and community authorities to notify  
7 332 participants of the study. Team members were sent to the various communities to stay among the  
8 333 community and organize mini clinics for a period of 1-2 weeks. Results of the study were disseminated  
9 334 through seminars, durbars and via radio and television stations.

### 15 335 **Statistical methods**

16  
17 336 Participants' characteristics were expressed as absolute numbers and percentages for categorical variables  
18 337 and as means and standard deviations (SD) for continuous variables. CKD prevalence with 5% error bars  
19 338 were presented as bar graphs for each SES construct across rural and urban Ghana. Spearman's rank  
20 339 correlation was used to determine correlations between the three SES constructs. Odds ratios (ORs) and  
21 340 their corresponding 95% confidence intervals (CIs) were estimated by means of logistic regression  
22 341 analyses to study the odds of albuminuria (ACR>3 mg/mmol, A2-A3, moderately to severely increased  
23 342 albuminuria), reduced kidney function (eGFR< 60 mL/min/1.73 m<sup>2</sup>, G3-G5 moderately to severely  
24 343 decreased kidney function) and increased CKD risk (high and very high CKD risk) by SES, with  
25 344 adjustments for potential confounders (age and sex).<sup>24</sup> In addition, the analyses were performed for the  
26 345 total population (using low educational level, low occupational status and low level of wealth index as  
27 346 reference categories). Further analysis was conducted to assess the contribution of SES  
28 347 indicators to rural-urban differences in albuminuria, reduced eGFR and CKD risk using  
29 348 rural Ghana as reference. Tolerance test and variance inflation factor (VIF) showed  
30 349 very small degree of collinearity among SES predictors thus we therefore adjusted for  
31 350 each of SES variables separately. Complete case analysis approach was used. All  
32 351 data available were included in the age-adjusted models. All analyses were performed  
33 352 using STATA, version 14.0 (StataCorp LP).

### 50 353 **Results**

51 354  
52  
53  
54  
55  
56  
57  
58  
59  
60

1  
2  
3 355 Table 1 shows characteristics of study participants. Participants in rural Ghana were  
4  
5  
6 356 slightly older than those in urban Ghana. Female preponderance was observed in both  
7  
8 357 rural (61.2%) and urban (71.4%) Ghana, though higher proportions were observed in  
9  
10 358 urban Ghana. Individuals living in rural Ghana were generally less educated (56.9%)  
11  
12 359 compared with those living in urban (43.9%) Ghana. There were slightly more  
13  
14 360 individuals with low occupational status in urban Ghana compared with their peers in  
15  
16 361 rural Ghana. People in urban Ghana (43.4%) were wealthier than their rural (24.9%)  
17  
18 362 counterparts. Rural Ghanaians (47.2%) were more physically active compared with their  
19  
20 363 urban peers. Smoking was low among Ghanaians though rural Ghanaians were more  
21  
22 364 likely to smoke compared with their urban peers. Hypercholesterolemia was more  
23  
24 365 prevalent in urban Ghana than in rural Ghana. Hypertension (36.7%) and type 2  
25  
26 366 diabetes (10.6%) were more prevalent in urban Ghanaians compared with those living  
27  
28 367 in rural Ghana. Urban Ghanaians were markedly more obese compared with their rural  
29  
30 368 peers. Except for eGFR, albuminuria and CKD risk prevalence rates were higher in  
31  
32 369 urban Ghana compared with rural Ghana.  
33  
34  
35  
36  
37  
38  
39  
40  
41  
42  
43  
44  
45  
46  
47  
48  
49  
50  
51  
52  
53  
54  
55  
56  
57  
58  
59  
60

1  
2  
3  
4 381  
5 382  
6  
7 383  
8  
9 384  
10 385  
11  
12 386  
13  
14 387  
15 388  
16  
17 389  
18  
19 390

**Table 1: Baseline characteristics by location**

|                               | Rural Ghana | Urban Ghana |
|-------------------------------|-------------|-------------|
| Number of participants, N (%) | 1043 (41.9) | 1449 (58.1) |
| Mean age, years (SD)          | 46.5 (12.6) | 45.2 (11.4) |
| Females, N (%)                | 638 (61.2)  | 1034 (71.4) |
| Educational level n (%)       |             |             |
| Low                           | 555 (56.9)  | 614 (43.9)  |
| Middle                        | 311 (31.9)  | 547 (39.1)  |
| High                          | 108 (11.2)  | 239 (17.0)  |
| Occupational status, n (%)    |             |             |
| Low                           | 250 (25.7)  | 374 (26.7)  |
| Middle                        | 628 (64.5)  | 818 (58.4)  |
| High                          | 96 (9.8)    | 209 (14.9)  |
| Wealth index, n (%)           |             |             |
| Low                           | 449 (46.5)  | 368 (26.6)  |
| Middle                        | 276 (28.6)  | 416 (30.0)  |
| High                          | 241 (24.9)  | 602 (43.4)  |
| BMI (kg/m <sup>2</sup> )      |             |             |
| < 25                          | 794 (76.3)  | 579 (39.9)  |
| 25-29.9                       | 189 (18.2)  | 495 (34.2)  |
| ≥ 30                          | 58 (5.5)    | 374 (25.9)  |
| Low physical activity, n (%)  | 663 (47.2)  | 592 (60.7)  |

|                                                            |            |             |
|------------------------------------------------------------|------------|-------------|
| Smoking, n (%)                                             | 22 (2.3)   | 14 (1.0)    |
| Hypercholesterolemia, n (%)                                | 78 (7.6)   | 270 (18.7)  |
| Hypertension, n (%)                                        | 306 (29.3) | 531 (36.7)  |
|                                                            | 53         |             |
| Diabetes, n (%)                                            | (5.1)      | 153 (10.6)  |
| Albuminuria, n (%)                                         |            |             |
|                                                            | 930 (91.6) |             |
| A1, Normal to mildly increased (ACR <3 mg/mmol)            | 85         | 1285 (89.1) |
| A2-A3, moderately to severely increased (ACR ≥ 3 mg/ (8.4) |            | 158 (10.9)  |
| eGFR, n (%)                                                |            |             |
| G1-G2 (≥ 60 mL/min/1.73m <sup>2</sup> )                    | 989 (96.3) | 1388 (96.3) |
| G3-G5 (<60 mL/min/1.73m <sup>2</sup> )                     | 38 (3.7)   | 54 (3.7)    |
| CKD risk, n (%)                                            |            |             |
| Low risk (green)                                           | 916 (90.5) | 1281 (88.9) |
| Moderately increased to very high risk<br>(yellow to red)  | 96 (9.5)   | 160 (11.1)  |

**Abbreviations:** N, number of respondents; SD, standard deviation; eGFR, estimated glomerular filtration rate; ACR, albumin creatinine ratio; CKD, Chronic kidney disease

Figure 1 shows prevalence of CKD by level of education in urban and rural Ghana. Prevalence of CKD decreased with increasing levels of education in rural Ghana. Higher prevalence of CKD was observed among individuals with low educational level compared with those with middle and high educational level. However, those with high educational level in urban Ghana had higher prevalence of CKD compared with those with middle level education. For occupational status, prevalence of CKD was higher among individuals with low occupational status in urban Ghana. Similar patterns were observed in rural Ghana; however, those with higher occupational status had higher prevalence of CKD compared with those with middle occupational status (Figure 2). Figure 3 shows prevalence of CKD by level of wealth index. CKD prevalence among

1  
2  
3 404 the levels of wealth index varied between urban and rural Ghana. Those with middle  
4  
5  
6 405 level wealth index had higher prevalence of CKD compared with those with low or  
7  
8 406 high CKD prevalence in both rural and urban Ghana. CKD prevalence rate for low and  
9  
10 407 high level wealth index in urban Ghana was the same while that of rural Ghana was  
11  
12 408 slightly different.  
13  
14  
15  
16  
17  
18  
19  
20  
21  
22  
23  
24  
25  
26  
27  
28  
29  
30  
31  
32  
33  
34  
35  
36  
37  
38  
39  
40  
41  
42  
43  
44  
45  
46  
47  
48  
49  
50  
51  
52  
53  
54  
55  
56  
57  
58  
59  
60

1  
2  
3 409 Among the whole group, educational level was positively associated with wealth index ( $p<0.01$ ) and composite SES  
4  
5  
6 410 ( $P<0.01$ ). Occupational level was also inversely associated with educational level ( $p<0.01$ ) and wealth index ( $p<0.01$ ). In  
7  
8 411 urban Ghana, high educational level was positively associated with high wealth index but inversely associated with  
9  
10 412 occupation ( $p<0.01$ ). In rural Ghana, high education was positively associated with high wealth index ( $p<0.01$ ), but there  
11  
12 413 was no significant association between education and occupation. High wealth index was inversely associated with high  
13  
14 414 occupational status in both rural and urban Ghana ( $p<0.01$ ) (Table 2).  
15  
16  
17 415  
18  
19  
20 416 **Table 2: Relationship between SES constructs (educational, occupational level and wealth index) by urban**  
21 417 **rural Ghana**  
22  
23 418  
24 419

| Correlation matrix  | Educational level | Occupational level | Wealth index | SES   |
|---------------------|-------------------|--------------------|--------------|-------|
| <b>Whole group</b>  |                   |                    |              |       |
| Educational level   | 1.000             |                    |              |       |
| Occupational status | <b>-0.060</b>     | 1.000              |              |       |
|                     | <b>0.004</b>      |                    |              |       |
| Wealth Index        | 0.282             | <b>-0.121</b>      | 1.000        |       |
|                     | 0.001             | <b>0.001</b>       |              |       |
| SES                 | <b>1.000</b>      | <b>-0.059</b>      | <b>0.282</b> | 1.000 |
|                     | <b>0.003</b>      | <b>0.006</b>       | <b>0.001</b> |       |



**Urban Ghana**

|                     |               |               |              |       |
|---------------------|---------------|---------------|--------------|-------|
| Educational level   | 1.000         |               |              |       |
| Occupational status | <b>-0.115</b> | 1.000         |              |       |
|                     | <b>0.001</b>  |               |              |       |
| Wealth Index        | <b>0.294</b>  | <b>-0.126</b> | 1.000        |       |
|                     | <b>0.001</b>  | <b>0.001</b>  |              |       |
| SES                 | <b>1.000</b>  | <b>-0.024</b> | <b>0.937</b> | 1.000 |
|                     | <b>0.002</b>  | <b>0.001</b>  | <b>0.001</b> |       |

**Rural Ghana**

|                     |              |               |              |       |
|---------------------|--------------|---------------|--------------|-------|
| Educational level   | 1.000        |               |              |       |
| Occupational status | 0.017        | 1.000         |              |       |
|                     | 0.589        |               |              |       |
| Wealth Index        | <b>0.219</b> | <b>-0.135</b> | 1.000        |       |
|                     | <b>0.001</b> | <b>0.001</b>  |              |       |
| SES                 | <b>0.504</b> | 0.017         | <b>0.934</b> | 1.000 |
|                     | <b>0.001</b> | 0.587         | <b>0.001</b> |       |

420

421

422

423

424

425

426

427

428

429

430

431 Table 3 shows association between level of education, occupational status, level of wealth index and prevalence of  
 432 CKD. After adjusting for age and sex for the whole group, albuminuria was associated with middle level education (AOR=0.66, 0.48-0.91,  
 433 p<0.01). After adjusting for age and sex, we observed no significant association between SES indicators (educational level, occupational status and  
 434 wealth index) and CKD in urban Ghana. However, middle (AOR=0.51, 0.34-0.76, <0.01) and higher (AOR=0.53, 0.31-0.91, p<0.01) level  
 435 education was associated with reduced albuminuria in urban Ghana. Whereas educational level and occupational status were not associated with  
 436 CKD prevalence, high wealth index was significantly associated with higher odds of reduced eGFR in rural Ghana (AOR=2.38, 1.03-5.47,  
 437 P<0.01).

438

439 **Table 3: Association of SES indicators (educational level, occupational status and wealth index level) with albuminuria, reduced eGFR and CKD risk**

440

| Albuminuria (ACR ≥ 3 mg/mmol) | eGFR < 60 mL/min/1.73 m2 | High to very high CKD risk (KDIGO, 2012) |
|-------------------------------|--------------------------|------------------------------------------|
| OR (95% CI)                   | OR (95% CI)              | OR (95% CI)                              |

|                            | n (%)         | Model 1                 | n (%)        | Model 1                 | n (%)         | Model 1                 |
|----------------------------|---------------|-------------------------|--------------|-------------------------|---------------|-------------------------|
| <b>Education</b>           |               |                         |              |                         |               |                         |
| <b>Whole group</b>         |               |                         |              |                         |               |                         |
| Low                        | 1,152 (11.89) | 1.00 (Reference)        | 1,160 (3.97) | 1.00 (Reference)        | 1,150 (11.91) | 1.00 (Reference)        |
| Middle                     | 847 (7.32)    | <b>0.66 (0.48-0.91)</b> | 849 (3.77)   | 1.36 (0.83-2.22)        | 845 (8.28)    | 0.82 (0.59-1.12)        |
| High                       | 343 (7.00)    | 0.67 (0.42-1.07)        | 345 (3.19)   | 1.11 (0.55-2.29)        | 343 (8.75)    | 0.96 (0.62-1.49)        |
| <b>Urban Ghana</b>         |               |                         |              |                         |               |                         |
| Low                        | 612 (14.7)    | 1.00 (Reference)        | 612 (4.1)    | 1.00 (Reference)        | 612 (14.1)    | 1.00 (Reference)        |
| Middle                     | 546 (7.8)     | <b>0.51 (0.34-0.76)</b> | 546 (3.7)    | 1.12 (0.59-2.12)        | 545 (8.1)     | <b>0.59 (0.39-0.89)</b> |
| High                       | 238 (8.4)     | <b>0.53 (0.31-0.91)</b> | 238 (3.4)    | 0.91 (0.37-2.19)        | 238 (10.9)    | 0.83 (0.51-1.38)        |
| <b>Rural Ghana</b>         |               |                         |              |                         |               |                         |
| Low                        | 540 (8.7)     | 1.00 (Reference)        | 548 (3.8)    | 1.00 (Reference)        | 538 (9.5)     | 1.00 (Reference)        |
| Middle                     | 301 (6.3)     | 0.89 (0.51-1.59)        | 303 (3.9)    | 1.69 (0.77-3.66)        | 300 (8.7)     | 1.33 (0.79-2.25)        |
| High                       | 105 (3.8)     | 0.66 (0.23-1.95)        | 107 (2.8)    | 1.28 (0.35-4.71)        | 105 (3.8)     | 0.69 (0.23-2.02)        |
| <b>Occupational status</b> |               |                         |              |                         |               |                         |
| <b>Whole group</b>         |               |                         |              |                         |               |                         |
| Low                        | 614 (9.93)    | 1.00 (Reference)        | 616 (2.76)   | 1.00 (Reference)        | 613 (9.46)    | 1.00 (Reference)        |
| Middle                     | 1,427 (9.25)  | 0.82 (0.59-1.14)        | 1,436 (3.34) | 0.93 (0.52-1.66)        | 1,424 (9.90)  | 0.89 (0.65-1.24)        |
| High                       | 302 (10.26)   | 0.76 (0.47-1.22)        | 303 (7.92)   | 1.33 (0.67-2.62)        | 302 (12.91)   | 0.90 (0.57-1.42)        |
| <b>Urban Ghana</b>         |               |                         |              |                         |               |                         |
| Low                        | 207 (10.1)    | 1.00 (Reference)        | 207 (6.8)    | 1.00 (Reference)        | 207 (12.1)    | 1.00 (Reference)        |
| Middle                     | 817 (11.1)    | 1.50 (0.88-2.83)        | 817 (3.6)    | 1.15 (0.56-2.35)        | 816 (11.6)    | 1.37 (0.84-2.56)        |
| High                       | 373 (11.0)    | 1.57 (0.89-2.53)        | 373 (2.7)    | 1.02 (0.41-2.52)        | 373 (9.7)     | 1.21 (0.68-2.14)        |
| <b>Rural Ghana</b>         |               |                         |              |                         |               |                         |
| Low                        | 95 (10.5)     | 1.00 (Reference)        | 96 (10.4)    | 1.00 (Reference)        | 95 (14.7)     | 1.00 (Reference)        |
| Middle                     | 610 (6.7)     | 0.65 (0.31-1.37)        | 619 (3.1)    | <b>0.37 (0.16-0.85)</b> | 608 (7.6)     | 0.55 (0.28-1.08)        |
| High                       | 241 (8.3)     | 0.99 (0.43-2.28)        | 243 (2.9)    | 0.51 (0.18-1.44)        | 240 (9.2)     | 0.94 (0.44-2.01)        |
| <b>Wealth index</b>        |               |                         |              |                         |               |                         |

**Whole group**

|        |             |                  |            |                  |            |                  |
|--------|-------------|------------------|------------|------------------|------------|------------------|
| Low    | 808 (9.65)  | 1.00 (Reference) | 813 (3.32) | 1.00 (Reference) | 808 (9.16) | 1.00 (Reference) |
| Middle | 678 (10.91) | 1.18 (0.84-1.66) | 683 (3.81) | 1.30 (0.74-2.28) | 675 (12.0) | 1.43 (1.02-2.01) |
| High   | 835 (8.62)  | 0.93 (0.66-1.31) | 835 (4.19) | 1.55 (0.91-2.64) | 833 (9.96) | 1.21 (0.86-1.69) |

**Urban Ghana**

|        |            |                  |           |                  |            |                  |
|--------|------------|------------------|-----------|------------------|------------|------------------|
| Low    | 367 (11.2) | 1.00 (Reference) | 367 (3.5) | 1.00 (Reference) | 367 (10.1) | 1.00 (Reference) |
| Middle | 414 (12.3) | 1.12 (0.73-1.74) | 414 (3.9) | 1.30 (0.61-2.80) | 413 (13.1) | 1.45 (0.93-2.27) |
| High   | 601 (9.8)  | 0.82 (0.55-1.25) | 600 (3.8) | 1.13 (0.55-2.31) | 600 (10.8) | 1.11 (0.72-1.71) |

**Rural Ghana**

|        |           |                  |           |                         |            |                  |
|--------|-----------|------------------|-----------|-------------------------|------------|------------------|
| Low    | 441 (7.9) | 1.00 (Reference) | 446 (3.1) | 1.00 (Reference)        | 441 (8.4)  | 1.00 (Reference) |
| Middle | 264 (8.7) | 1.13 (0.65-1.98) | 269 (3.7) | 1.22 (0.52-2.84)        | 262 (10.3) | 1.31 (0.77-2.25) |
| High   | 234 (5.6) | 0.78 (0.40-1.53) | 235 (5.1) | <b>2.38 (1.03-5.47)</b> | 233 (7.7)  | 1.16 (0.63-2.14) |

Model 1, adjusted for age and sex; Abbreviations: CI, confidence interval; ACR, albumin creatinine ration; eGFR, estimated glomerular filtration rate; CKD, chronic kidney disease; OR, odds ratio, n= total number of individuals in the whole group, rural and urban Ghana among the various levels of SES constructs; %, proportion of individuals with CKD among the various levels of SES constructs in rural and urban Ghana.

Table 4 shows the contribution of all three SES constructs to rural and urban CKD prevalence differences. The odds of albuminuria and CKD risk was significantly higher in urban Ghana compared with rural Ghana (p<0.01). The higher rate of CKD observed in urban Ghana was not explained by the higher SES of that population as compared to their rural counterparts.

**Table 4: Contribution of SES indicators to rural-urban differences in albuminuria, reduced eGFR and CKD risk**

---

OR (95% CI)    OR (95% CI)    OR (95% CI)    OR (95% CI)    OR (95% CI)

|                                               |             | Model 1            | Model 2            | Model 3            | Model 4            | Model 5            |
|-----------------------------------------------|-------------|--------------------|--------------------|--------------------|--------------------|--------------------|
| <b>Albuminuria (ACR ≥ 3 mg/mmol)</b>          |             |                    |                    |                    |                    |                    |
|                                               | n cases     |                    |                    |                    |                    |                    |
| <b>Sites</b>                                  | (%)         |                    |                    |                    |                    |                    |
|                                               | 1,443       | <b>1.37 (1.03-</b> | <b>1.70 (1.25-</b> | <b>1.55 (1.15-</b> | <b>1.62 (1.18-</b> | <b>1.74 (1.27-</b> |
| Urban Ghana                                   | (10.9)      | <b>1.81)</b>       | <b>2.31)</b>       | <b>2.10)</b>       | <b>2.19)</b>       | <b>2.38)</b>       |
|                                               |             | 1.00               | 1.00               | 1.00               | 1.00               | 1.00               |
| Rural Ghana                                   | 1,015 (8.4) | (Reference)        | (Reference)        | (Reference)        | (Reference)        | (Reference)        |
| <b>eGFR &lt; 60 mL/min/1.73 m<sup>2</sup></b> |             |                    |                    |                    |                    |                    |
|                                               | n cases     |                    |                    |                    |                    |                    |
| <b>Sites</b>                                  | (%)         |                    |                    |                    |                    |                    |
|                                               |             | 1.27 (0.82-        | 1.20 (0.76-        | 1.18 (0.79-        | 1.12 (0.70-        | 1.07 (0.67-        |
| Urban Ghana                                   | 1,442 (3.7) | 1.97)              | 1.89)              | 1.86)              | 1.78)              | 1.72)              |
|                                               |             | 1.00               | 1.00               | 1.00               | 1.00               | 1.00               |
| Rural Ghana                                   | 1,027 (3.7) | (Reference)        | (Reference)        | (Reference)        | (Reference)        | (Reference)        |
| <b>High to very high CKD risk</b>             |             |                    |                    |                    |                    |                    |
|                                               | n cases     |                    |                    |                    |                    |                    |
| <b>Sites</b>                                  | (%)         |                    |                    |                    |                    |                    |
|                                               | 1,441       | <b>1.23 (1.01-</b> | <b>1.44 (1.07-</b> | <b>1.38 (1.03-</b> | <b>1.36 (1.01-</b> | <b>1.40 (1.04-</b> |
| Urban Ghana                                   | (11.1)      | <b>1.62)</b>       | <b>1.93)</b>       | <b>1.84)</b>       | <b>1.83)</b>       | <b>1.91)</b>       |
|                                               | 1,012       | 1.00               | 1.00               | 1.00               | 1.00               | 1.00 (Reference)   |
| Rural Ghana                                   | (9.46)      | (Reference)        | (Reference)        | (Reference)        | (Reference)        |                    |

454

1  
2  
3  
4  
5  
6  
7  
8  
9  
10  
11  
12  
13  
14  
15  
16  
17  
18  
19  
20  
21  
22  
23  
24  
25  
26  
27  
28  
29  
30  
31  
32  
33  
34  
35  
36  
37  
38  
39  
40  
41  
42  
43  
44  
45  
46  
47

455 Model 1#: adjusted for age and sex; Model 2: adjusted for age, sex and education level; Model 3: adjusted for age, sex and occupational status;  
456 Model 4: adjusted for age, sex and wealth index; Model 5: adjusted for age, sex, educational level, occupational status and wealth index;  
457 Abbreviations: CI, confidence interval; ACR, albumin creatinine ratio; eGFR, estimated glomerular filtration rate; CKD, chronic kidney disease; OR, odds ratio, n= total number  
458 of individuals in rural and urban Ghana; %, proportion of individuals with CKD among urban and rural Ghana.

For peer review only

1  
2  
3 4594  
5  
6 460 **Discussion**7  
8 461 ***Key findings***

9  
10 462 Our study findings show no association between all three SES constructs and the  
11  
12 463 prevalence of CKD in both rural and urban Ghana except for wealth index in rural  
13  
14 464 Ghana, with the risk of CKD being higher in the wealthier populations. The higher rate  
15  
16 465 of CKD observed in urban Ghana could not be attributed to the higher SES of that  
17  
18 466 population compared to their rural counterparts.  
19  
20  
21

22 467

23  
24 468 **Discussion of key findings**25  
26 46927  
28  
29 470 ***Association of SES with CKD in rural and urban Ghana***30  
31 471

32 472 Our study did not find any significant associations between all three SES constructs  
33  
34 473 and CKD among rural and urban Ghana except for wealth index in rural Ghana. The  
35  
36 474 positive association observed between wealth index in rural Ghana may be due to  
37  
38 475 several reasons. A comparison of the three SES constructs showed higher educational  
39  
40 476 level to be associated with wealth index in both rural and urban Ghana but not  
41  
42 477 occupational level. This seems to suggest that occupational level may not be  
43  
44 478 adequately capturing the SES status of individuals living in these settings in relation to  
45  
46 479 CKD. For example, Masthi et al, compared different SES scales in rural and urban  
47  
48 480 India and concluded that Standard of Living Index (SLI) scale was more accurate for classification  
49  
50 481 of SES in urban and rural settings<sup>25</sup>. Our finding is consistent with other studies,<sup>6 26</sup> which  
51  
52 482 reported no association between SES and CKD in high-income countries and LMICs,  
53  
54  
55  
56  
57  
58  
59  
60

1  
2  
3  
4 483 but in contrast with other studies <sup>2-4 27</sup> that found positive associations between SES  
5  
6 484 and CKD. The reasons for our current finding are unclear. However, it has been  
7  
8 485 suggested that these inconsistent associations may be due to the varying pathways  
9  
10 486 through which the effect of SES on health status is mediated. For example, at a given  
11  
12 487 educational level marked ethnic differences have been reported. Additionally, similar  
13  
14 488 differences were observed for wealth status at a given income level <sup>28-30</sup>.

15  
16  
17  
18 489  
19  
20 490 ***Contribution of SES to observed CKD risk differences between rural and***  
21  
22 491 ***urban Ghana***

23 492  
24 493 We observed higher rates of CKD in urban Ghana compared with rural Ghana, as expected. The observed  
25  
26 494 higher rates of CKD in our study were not explained by the higher SES of that population as compared to  
27  
28 495 their rural counterparts. Our results indicate that this is due to the lack of a clear difference in the SES  
29  
30 496 distribution of rural and urban Ghana observed in this study, as well as to the lack of associations between  
31  
32 497 SES and CKD. Consistent with our findings, in a study conducted in Northern Tanzania SES did not  
33  
34 498 explain increased risk of CKD in urban Tanzania <sup>26</sup>. The lack of associations between SES and CKD  
35  
36 499 could probably and partly be explained by the process of epidemiological transition in relation to the  
37  
38 500 “diffusion theory” of ischemic heart disease mortality. This theory attributes the commencement of  
39  
40 501 ischemic heart disease to individuals in the high SES group due to their ability to afford behaviours  
41  
42 502 (smoking, alcohol and sedentary lifestyles) which increased risk of ischemic heart disease. The lower SES  
43  
44 503 groups were later affected partially because of improved living standards, unhealthy life style imitation  
45  
46 504 and urbanization. The higher SES groups were the first to embrace behavioural changes required to  
47  
48 505 decrease the risk of ischemic heart disease and this resulted in reversing the gradient <sup>31</sup>. The rapid  
49  
50 506 urbanization of some rural communities in the Ashanti region of Ghana and the  
51  
52 507 imitation of urban lifestyle could account for our finding. Also, it could be that whereas  
53  
54 508 the high SES group in urban Ghana has already embraced favourable behavioural  
55  
56 509 changes, those in rural Ghana are yet to do so <sup>32</sup>. This explains the observed association of  
57  
58 510 wealth index with CKD in rural Ghana but not in urban Ghana. Also, the interplay of other less



1  
2  
3 511 understood or researched factors (e.g., exposure to nephrotoxins, herbal medications,  
4  
5 512 sepsis, psychosocial factors) may be influencing the pathway in which SES influences  
6  
7  
8 513 CKD prevalence and progression.  
9

10 514

### 11 515 ***Strength and limitation***

12 516

13  
14  
15 517 Our study presents several strengths. First, we used well-standardized study protocols across rural and  
16  
17 518 urban Ghana. Our study is also the first in Africa to use all three categories of CKD definition  
18  
19 519 (albuminuria, reduced eGFR and CKD risk) by KDIGO 2012 in assessing association of SES with CKD  
20  
21 520 in rural and urban setting, this provided more detailed information on CKD outcomes. The limitation of  
22  
23 521 intra laboratory variability in earlier studies was eliminated using the same standard operating procedures  
24  
25 522 in the same laboratory for running all samples for both rural and urban Ghana. The use of three constructs  
26  
27 523 of SES in this study also provides a much better holistic approach to assessing SES. Also, the distribution  
28  
29 524 of SES in our study reflects on the national data allowing for generalization of our findings. Our study  
30  
31 525 was limited by the use of cross sectional design, which prevented us from determining causality between  
32  
33 526 predictors and CKD progression. Furthermore, there were more women than men in our study due to the  
34  
35 527 higher response rate in women compared with men. However, this applied to both rural and urban Ghana.  
36  
37 528 We therefore do not expect this to influence our results in a significant way.

38 529

39 530

### 40 531 ***Conclusion***

41 532

42  
43 533 All three SES constructs appear not to be associated with prevalence of CKD in urban  
44  
45 534 and rural Ghana except for wealth index in rural Ghana. The observed higher  
46  
47 535 prevalence of CKD in urban Ghana was not explained by the higher SES in urban  
48  
49 536 Ghana. Our study seems to suggest that other non-traditional factors such as  
50  
51 537 nephrotoxins, herbal medications, psychosocial stressors and misuse of over the  
52  
53 538 counter drugs may play a role and underscores the need to further explore these  
54  
55 539 factors.  
56  
57  
58  
59  
60

1  
2  
3 540  
4  
56 541 **Acknowledgement**

7 542 The authors are very grateful to the research assistants, interviewers and other staff of the five research  
8 543 locations who took part in gathering the data and the Ghanaian volunteers in all the participating RODAM  
9 544 sites. We gratefully acknowledge the advisory board members for their valuable support in shaping the  
10 545 RODAM study methods and the Academic Medical Centre Biobank for their support in biobank  
11 546 management and high-quality storage of collected samples.

12  
13  
14  
15  
16 547  
17

18 548

19 549 **Contributors**

20 550 My co-authors have all contributed substantially to this manuscript and approve of this  
21 551 submission. Research idea and study design: DNA, CA, KS, DA, EB, KM, JA; data acquisition  
22 552 and curation: DNA, CA, EB, KM, data analysis/interpretation: DNA, CA, KS, DA, EB, KM, LS,  
23 553 JA, EOD, KKG, FPM, ID, JS, SB, ADA; statistical analysis: DNA, CA, KS. DNA, CA, KS, DA,  
24 554 EB, KM, LS, JA, EOD, KKG, FPM, ID, JS, SB, ADA contributed important intellectual content  
25 555 during manuscript drafting or revision and accepts accountability for the overall work by  
26 556 ensuring that questions pertaining to the accuracy or integrity of any portion of the work are  
27 557 appropriately investigated and resolved. DNA and CA take responsibility that this study has been  
28 558 reported honestly, accurately, and transparently; that no important aspects of the study have been  
29 559 omitted; and that any discrepancies from the study as planned have been explained.

30  
31  
32  
33  
34  
35  
36  
37  
38  
39 56040 561 **Funding**

41 562  
42 563 This work was supported by the European Commission under the Framework Programme (Grant  
43 564 Number: 278901). The funders had no role in study design, data collection and analysis, decision to  
44 565 publish, or preparation of the manuscript. The Wellcome Trust supported Professor Smeeth's  
45 566 contribution, grant number WT082178. Professor Joachim Spranger was supported by the DZHK  
46 567 (German Center for cardiovascular research) and the Berlin Institute of Health (BIH).

47 568 **Competing interest:** I have communicated with all my co-authors and obtained their full  
48 569 disclosures. My co-authors and I declare no conflicts of interest.

1  
2  
3 570 **Patient Consent:** None declared  
4  
5 571

6  
7 572 **Ethics approval:** IRBs at each participating site.  
8  
9 573

10 574 **Data sharing statement:** Data are available from the RODAM research cohort, a third  
11  
12 575 party. Dr. Eric Beune affiliated with the RODAM research cohort and a co-author of this paper  
13  
14 576 in accordance with the RODAM requirements for collaboration. Dr. Beune is the Data Collection  
15  
16 577 Coordinator of RODAM and may be contacted with further questions (e.j.beune@amc.uva.nl).  
17  
18 578 Additionally, researchers interested in further collaboration with RODAM may see the following  
19  
20 579 URL: <http://www.rod-am.eu/>  
21  
22

23 580

24 581

25 582

26 583

27 584

28 585

29 586

30 587

31 588

32 589

33 590

34 591

35 592

36 593

37 594

38 595

39 596

40 597

41 598

42 599

43 600  
44  
45  
46  
47  
48  
49  
50  
51  
52  
53  
54  
55  
56  
57  
58  
59  
60

1  
2  
3  
4 601  
5 602  
6  
7 603  
8  
9 604  
10 605  
11  
12 606  
13  
14 607  
15 608  
16  
17 609  
18  
19 610  
20 611  
21  
22 612  
23  
24 613  
25 614  
26  
27 615  
28 616  
29 617  
30 618  
31 619  
32 620  
33 621  
34 622  
35 623  
36 624  
37 625  
38 626  
39 627  
40 628  
41 629  
42 630  
43 631  
44 632  
45 633  
46 634  
47 635  
48 636  
49 637  
50 638  
51 639  
52 640  
53  
54  
55  
56  
57  
58  
59  
60

## References

1. Patzer RE, McClellan WM. Influence of race, ethnicity and socioeconomic status on kidney disease. *Nature Reviews Nephrology* 2012;8(9):533-41.
2. Merkin SS, Roux AVD, Coresh J, et al. Individual and neighborhood socioeconomic status and progressive chronic kidney disease in an elderly population: The Cardiovascular Health Study. *Soc Sci Med* 2007;65(4):809-21.
3. Bello AK, Peters J, Rigby J, et al. Socioeconomic status and chronic kidney disease at presentation to a renal service in the United Kingdom. *Clin J Am Soc Nephrol* 2008;3(5):1316-23.
4. Crews DC, Charles RF, Evans MK, et al. Poverty, race, and CKD in a racially and socioeconomically diverse urban population. *Am J Kidney Dis* 2010;55(6):992-1000.
5. Shoham DA, Vupputuri S, Roux AVD, et al. Kidney disease in life-course socioeconomic context: the Atherosclerosis Risk in Communities (ARIC) Study. *Am J Kidney Dis* 2007;49(2):217-26.
6. Byrne C, Nedelman J, Luke RG. Race, socioeconomic status, and the development of end-stage renal disease. *Am J Kidney Dis* 1994;23(1):16-22.
7. Popkin BM. The shift in stages of the nutrition transition in the developing world differs from past experiences! *Public Health Nutr* 2002;5(1A):205-14.
8. Du S, Lu B, Zhai F, et al. A new stage of the nutrition transition in China. *Public Health Nutr* 2002;5(1a):169-74.
9. Kim S, Symons M, Popkin BM. Contrasting socioeconomic profiles related to healthier lifestyles in China and the United States. *Am J Epidemiol* 2004;159(2):184-91.
10. Adler NE, Ostrove JM. Socioeconomic status and health: what we know and what we don't. *Ann N Y Acad Sci* 1999;896(1):3-15.
11. Anderson NB, Armstead CA. Toward understanding the association of socioeconomic status and health: A new challenge for the biopsychosocial approach. *Psychosom Med* 1995;57(3):213-25.

- 1  
2  
3 641 12. Feinstein JS. The relationship between socioeconomic status and health: a review of the  
4 642 literature. *The Milbank Quarterly* 1993;279-322.
- 5 643 13. Samuel P, Antonisamy B, Raghupathy P, et al. Socio-economic status and cardiovascular risk  
6 644 factors in rural and urban areas of Vellore, Tamilnadu, South India. *Int J Epidemiol*  
7 645 2012;41(5):1315-27.
- 8 646 14. Christie S, Fone DL. Does car ownership reflect socio-economic disadvantage in rural areas?  
9 647 A cross-sectional geographical study in Wales, UK. *Public Health* 2003;117(2):112-16.
- 10 648 15. Agyemang C, Beune E, Meeks K, et al. Rationale and cross-sectional study design of the  
11 649 Research on Obesity and type 2 Diabetes among African Migrants: the RODAM study.  
12 650 *BMJ open* 2015;4(3):e004877.
- 13 651 16. Addo J, Agyemang C, Aikins Ad-G, et al. Association between socioeconomic position and  
14 652 the prevalence of type 2 diabetes in Ghanaians in different geographic locations: the  
15 653 RODAM study. *J Epidemiol Community Health* 2017;jech-2016-208322.
- 16 654 17. Adjei DN, Stronks K, Adu D, et al. Relationship between educational and occupational  
17 655 levels, and Chronic Kidney Disease in a multi-ethnic sample-The HELIUS study. *PLoS*  
18 656 *One* 2017;12(11):e0186460.
- 19 657 18. Consultation WE. Waist circumference and waist-hip ratio. *Report of a WHO Expert*  
20 658 *Consultation Geneva: World Health Organization* 2008:8-11.
- 21 659 19. Rutstein SO, Johnson K, MEASURE OM. The DHS wealth index: ORC Macro, MEASURE  
22 660 DHS 2004.
- 23 661 20. Association AD. Standards of medical care in diabetes—2014. *Diabetes Care*  
24 662 2014;37(Supplement 1):S14-S80.
- 25 663 21. Stevens LA, Schmid CH, Greene T, et al. Comparative performance of the CKD  
26 664 epidemiology collaboration (CKD-EPI) and the modification of diet in renal disease  
27 665 (MDRD) study equations for estimating GFR levels above 60 mL/min/1.73 m<sup>2</sup>. *Am J*  
28 666 *Kidney Dis* 2010;56(3):486-95.
- 29 667 22. Eknoyan G, Lameire N, Eckardt K, et al. KDIGO 2012 clinical practice guideline for the  
30 668 evaluation and management of chronic kidney disease. *Kidney Int* 2013;3:5-14.
- 31 669 23. KDIGO G. Work Group. KDIGO clinical practice guideline for glomerulonephritis. *Kidney*  
32 670 *inter, Suppl* 2012;2:139-274.
- 33 671 24. Collins AJ, Foley RN, Herzog C, et al. US Renal Data System 2010 Annual Data Report.  
34 672 *American journal of kidney diseases: the official journal of the National Kidney*  
35 673 *Foundation* 2011;57(1 Suppl 1):A8, e1.
- 36 674 25. Masthi NR, Gangaboraiah PK. An exploratory study on socio economic status scales in a  
37 675 rural and urban setting. *Journal of family medicine and primary care* 2013;2(1):69.
- 38 676 26. Stanifer JW, Maro V, Egger J, et al. The epidemiology of chronic kidney disease in Northern  
39 677 Tanzania: a population-based survey. *PLoS One* 2015;10(4):e0124506.
- 40 678 27. Bruce MA, Beech BM, Crook ED, et al. Association of socioeconomic status and CKD  
41 679 among African Americans: the Jackson Heart Study. *Am J Kidney Dis* 2010;55(6):1001-  
42 680 08.
- 43 681 28. Braveman PA, Cubbin C, Egerter S, et al. Socioeconomic status in health research: one size  
44 682 does not fit all. *JAMA* 2005;294(22):2879-88.
- 45 683 29. Gilthorpe MS, Wilson RC. Rural/urban differences in the association between deprivation  
46 684 and healthcare utilisation. *Soc Sci Med* 2003;57(11):2055-63.

- 1  
2  
3 685 30. Choi AI, Weekley CC, Chen S-C, et al. Association of educational attainment with chronic  
4 686 disease and mortality: the Kidney Early Evaluation Program (KEEP). *Am J Kidney Dis*  
5 687 2011;58(2):228-34.  
6 688  
7 688 31. Mackenbach JP, Cavelaars A, Kunst AE, et al. Socioeconomic inequalities in cardiovascular  
8 689 disease mortality. An international study. *Eur Heart J* 2000;21(14):1141-51.  
9 690  
10 691 32. McKay L, Macintyre S, Ellaway A. Migration and health: a review of the international  
11 692 literature. MRC Social and Public Health Sciences Unit, Occasional Paper No. 12.  
12 693 *Glasgow: Medical Research Council[Links]* 2003  
13 694  
14 695  
15 696  
16 697  
17 698  
18 699  
19 700  
20 701  
21 702  
22 703  
23 704  
24 705  
25 706  
26 707

### Legend for figures

27 707  
28 708  
29 709  
30 710  
31 711  
32 712  
33 713  
34 714  
35 715  
36 716  
37 717  
38 718  
39 719  
40 720  
41 721  
42 722  
43 723  
44 724  
45 725  
46 726  
47 727  
48 728  
49 729  
50  
51  
52  
53  
54  
55  
56  
57  
58  
59  
60

Figure 1: Prevalence of chronic kidney disease (CKD) across level of education among urban and rural participants. Definitions according to 2012 KDIGO (Kidney Disease: Improving Global Outcomes) guideline. CKD was defined as being in moderately increased risk, high-risk, or very high-risk groups.

Figure 2: Prevalence of chronic kidney disease (CKD) across occupational status among urban and rural participants. Definitions according to 2012 KDIGO (Kidney Disease: Improving Global Outcomes) guideline. CKD was defined as being in moderately increased risk, high-risk, or very high-risk groups.

Figure 3: Prevalence of chronic kidney disease (CKD) across wealth index categories among urban and rural participants. Definitions according to 2012 KDIGO (Kidney Disease: Improving Global Outcomes) guideline. CKD was defined as being in moderately increased risk, high-risk, or very high-risk groups.

1  
2  
3  
4  
5  
6  
7  
8  
9  
10  
11  
12  
13  
14  
15  
16  
17  
18  
19  
20  
21  
22  
23  
24  
25  
26  
27  
28  
29  
30  
31  
32  
33  
34  
35  
36  
37  
38  
39  
40  
41  
42  
43  
44  
45  
46  
47  
48  
49  
50  
51  
52  
53  
54  
55  
56  
57  
58  
59  
60



Figure 1: Prevalence of chronic kidney disease (CKD) across level of education among urban and rural participants Definitions according to 2012 KDIGO (Kidney Disease: Improving Global Outcomes) guideline. CKD was defined as being in moderately increased risk, high-risk, or very high-risk groups

Figure 1: Prevalence of chronic kidney disease (CKD) across level of education among urban and rural participants Definitions according to 2012 KDIGO (Kidney Disease: Improving Global Outcomes) guideline. CKD was defined as being in moderately increased risk, high-risk, or very high-risk groups.

279x361mm (300 x 300 DPI)



Figure 2: Prevalence of chronic kidney disease (CKD) across occupational status among urban and rural participants. Definitions according to 2012 KDIGO (Kidney Disease: Improving Global Outcomes) guideline. CKD was defined as being in moderately increased risk, high-risk, or very high-risk groups

Figure 2: Prevalence of chronic kidney disease (CKD) across occupational status among urban and rural participants. Definitions according to 2012 KDIGO (Kidney Disease: Improving Global Outcomes) guideline. CKD was defined as being in moderately increased risk, high-risk, or very high-risk groups.

279x361mm (300 x 300 DPI)



1  
2  
3  
4  
5  
6  
7  
8  
9  
10  
11  
12  
13  
14  
15  
16  
17  
18  
19  
20  
21  
22  
23  
24  
25  
26  
27  
28  
29  
30  
31  
32  
33  
34  
35  
36  
37  
38  
39  
40  
41  
42  
43  
44  
45  
46  
47  
48  
49  
50  
51  
52  
53  
54  
55  
56  
57  
58  
59  
60

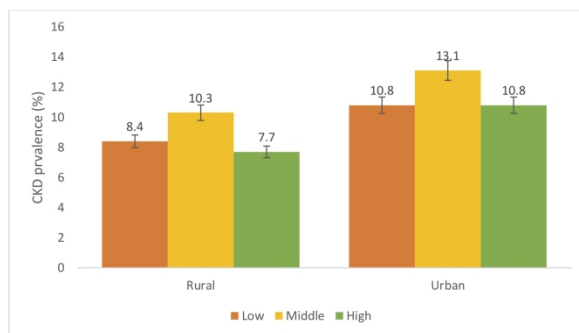

Figure 3: Prevalence of chronic kidney disease (CKD) across wealth index categories among urban and rural participants. Definitions according to 2012 KDIGO (Kidney Disease: Improving Global Outcomes) guideline. CKD was defined as being in moderately increased risk, high-risk, or very high-risk groups

Figure 3: Prevalence of chronic kidney disease (CKD) across wealth index categories among urban and rural participants. Definitions according to 2012 KDIGO (Kidney Disease: Improving Global Outcomes) guideline. CKD was defined as being in moderately increased risk, high-risk, or very high-risk groups.

279x361mm (300 x 300 DPI)

STROBE Statement—checklist of items that should be included in reports of observational studies

|                           | Item No. | Recommendation                                                                                                                  | Page No. | Relevant text from manuscript                                                                                                                                                                                                                                                                                                                                                             |
|---------------------------|----------|---------------------------------------------------------------------------------------------------------------------------------|----------|-------------------------------------------------------------------------------------------------------------------------------------------------------------------------------------------------------------------------------------------------------------------------------------------------------------------------------------------------------------------------------------------|
| <b>Title and abstract</b> | 1        | (a) Indicate the study’s design with a commonly used term in the title or the abstract                                          | 1,2      | We have included a commonly used term in the title and abstract                                                                                                                                                                                                                                                                                                                           |
|                           |          | (b) Provide in the abstract an informative and balanced summary of what was done and what was found                             | 2        | Our study did not find any associations between SES indicators and CKD in both rural and urban Ghana after age and sex adjustment except in rural Ghana where wealth index was associated with prevalence of CKD. Consequently, the higher SES did not account for the increased rate of CKD among urban dwellers suggesting the need to identify other factors that may be driving this. |
| <b>Introduction</b>       |          |                                                                                                                                 |          |                                                                                                                                                                                                                                                                                                                                                                                           |
| Background/rationale      | 2        | Explain the scientific background and rationale for the investigation being reported                                            | 4        | The theoretical and scientific background as well as the rationale for conducting the study have been provided in the introduction section.                                                                                                                                                                                                                                               |
| Objectives                | 3        | State specific objectives, including any prespecified hypotheses                                                                | 4        | We assessed the association of SES with CKD in rural and urban Ghana and studied what extent the higher SES of people in urban areas could account for differences in CKD between rural and urban populations                                                                                                                                                                             |
| <b>Methods</b>            |          |                                                                                                                                 |          |                                                                                                                                                                                                                                                                                                                                                                                           |
| Study design              | 4        | Present key elements of study design early in the paper                                                                         | 5-6      | Details given in the methods                                                                                                                                                                                                                                                                                                                                                              |
| Setting                   | 5        | Describe the setting, locations, and relevant dates, including periods of recruitment, exposure, follow-up, and data collection | 5-6      | Rural or urban Ghana.                                                                                                                                                                                                                                                                                                                                                                     |

|                              |    |                                                                                                                                                                                                                                                                                                                                                                                                                                                                                    |     |                                                                                                                                       |
|------------------------------|----|------------------------------------------------------------------------------------------------------------------------------------------------------------------------------------------------------------------------------------------------------------------------------------------------------------------------------------------------------------------------------------------------------------------------------------------------------------------------------------|-----|---------------------------------------------------------------------------------------------------------------------------------------|
| Participants                 | 6  | <p>(a) <i>Cohort study</i>—Give the eligibility criteria, and the sources and methods of selection of participants. Describe methods of follow-up</p> <p><i>Case-control study</i>—Give the eligibility criteria, and the sources and methods of case ascertainment and control selection. Give the rationale for the choice of cases and controls</p> <p><i>Cross-sectional study</i>—Give the eligibility criteria, and the sources and methods of selection of participants</p> | 6-8 | A multi-centre cross-sectional study was conducted among Ghanaian adults (n=2492) aged 25-70 years residing in rural and urban Ghana. |
|                              |    | <p>(b) <i>Cohort study</i>—For matched studies, give matching criteria and number of exposed and unexposed</p> <p><i>Case-control study</i>—For matched studies, give matching criteria and the number of controls per case</p>                                                                                                                                                                                                                                                    |     |                                                                                                                                       |
| Variables                    | 7  | Clearly define all outcomes, exposures, predictors, potential confounders, and effect modifiers. Give diagnostic criteria, if applicable                                                                                                                                                                                                                                                                                                                                           | 6-8 | The main outcomes have been clearly defined.                                                                                          |
| Data sources/<br>measurement | 8* | For each variable of interest, give sources of data and details of methods of assessment (measurement). Describe comparability of assessment methods if there is more than one group                                                                                                                                                                                                                                                                                               | 6-8 | We defined each variable of interest in the methods accordingly                                                                       |
| Bias                         | 9  | Describe any efforts to address potential sources of bias                                                                                                                                                                                                                                                                                                                                                                                                                          | 18  | Potential sources of bias have discussed in the discussion section                                                                    |
| Study size                   | 10 | Explain how the study size was arrived at                                                                                                                                                                                                                                                                                                                                                                                                                                          | 5   | Given in the methods section and we have also referred to the RODAM study methods paper                                               |

Continued on next page

|                        |     |                                                                                                                                                                                                                                                                                                           |       |                                                                                              |
|------------------------|-----|-----------------------------------------------------------------------------------------------------------------------------------------------------------------------------------------------------------------------------------------------------------------------------------------------------------|-------|----------------------------------------------------------------------------------------------|
| Quantitative variables | 11  | Explain how quantitative variables were handled in the analyses. If applicable, describe which groupings were chosen and why                                                                                                                                                                              | 8-9   | Please see methods                                                                           |
| Statistical methods    | 12  | (a) Describe all statistical methods, including those used to control for confounding                                                                                                                                                                                                                     | 8-9   | Please see methods                                                                           |
|                        |     | (b) Describe any methods used to examine subgroups and interactions                                                                                                                                                                                                                                       | 8-9   | Please see methods                                                                           |
|                        |     | (c) Explain how missing data were addressed                                                                                                                                                                                                                                                               | 8-9   |                                                                                              |
|                        |     | (d) <i>Cohort study</i> —If applicable, explain how loss to follow-up was addressed<br><i>Case-control study</i> —If applicable, explain how matching of cases and controls was addressed<br><i>Cross-sectional study</i> —If applicable, describe analytical methods taking account of sampling strategy | NA    | We have reported non-response across sites                                                   |
|                        |     | (e) Describe any sensitivity analyses                                                                                                                                                                                                                                                                     | NA    |                                                                                              |
| <b>Results</b>         |     |                                                                                                                                                                                                                                                                                                           |       |                                                                                              |
| Participants           | 13* | (a) Report numbers of individuals at each stage of study—eg numbers potentially eligible, examined for eligibility, confirmed eligible, included in the study, completing follow-up, and analysed                                                                                                         | 5     | Non-response analysis was done to shed light on the differential response rates across sites |
|                        |     | (b) Give reasons for non-participation at each stage                                                                                                                                                                                                                                                      | 5     |                                                                                              |
|                        |     | (c) Consider use of a flow diagram                                                                                                                                                                                                                                                                        | 5     | We have also referred to RODAM methods paper                                                 |
| Descriptive data       | 14* | (a) Give characteristics of study participants (eg demographic, clinical, social) and information on exposures and potential confounders                                                                                                                                                                  | 5     | We have also referred to RODAM methods paper                                                 |
|                        |     | (b) Indicate number of participants with missing data for each variable of interest                                                                                                                                                                                                                       | 5     | We have also referred to RODAM methods paper                                                 |
|                        |     | (c) <i>Cohort study</i> —Summarise follow-up time (eg, average and total amount)                                                                                                                                                                                                                          | NA    |                                                                                              |
| Outcome data           | 15* | <i>Cohort study</i> —Report numbers of outcome events or summary measures over time                                                                                                                                                                                                                       | NA    |                                                                                              |
|                        |     | <i>Case-control study</i> —Report numbers in each exposure category, or summary measures of exposure                                                                                                                                                                                                      | NA    |                                                                                              |
|                        |     | <i>Cross-sectional study</i> —Report numbers of outcome events or summary measures                                                                                                                                                                                                                        | 9-10  | Summary measures are given in the results section and in tables and figures                  |
| Main results           | 16  | (a) Give unadjusted estimates and, if applicable, confounder-adjusted estimates and their precision (eg, 95% confidence interval). Make clear which confounders were adjusted for and why they were included                                                                                              | 12-16 | Unadjusted and adjusted estimates are given in the results section and in figures            |
|                        |     | (b) Report category boundaries when continuous variables were categorized                                                                                                                                                                                                                                 | 12-16 | We have provided mean and corresponding standard deviations for the continuous variables.    |

|                          |    |                                                                                                                                                                            |       |                                                                                                                                                  |
|--------------------------|----|----------------------------------------------------------------------------------------------------------------------------------------------------------------------------|-------|--------------------------------------------------------------------------------------------------------------------------------------------------|
|                          |    | (c) If relevant, consider translating estimates of relative risk into absolute risk for a meaningful time                                                                  | NA    |                                                                                                                                                  |
|                          |    | Continued on next page                                                                                                                                                     |       |                                                                                                                                                  |
| Other analyses           | 17 | Report other analyses done—eg analyses of subgroups and interactions, and sensitivity analyses                                                                             | NA    |                                                                                                                                                  |
| <b>Discussion</b>        |    |                                                                                                                                                                            |       |                                                                                                                                                  |
| Key results              | 18 | Summarise key results with reference to study objectives                                                                                                                   | 8     |                                                                                                                                                  |
| Limitations              | 19 | Discuss limitations of the study, taking into account sources of potential bias or imprecision. Discuss both direction and magnitude of any potential bias                 | 18    | Key limitations regarding study methods including differential response rates and sampling methods in the various study sites have been provided |
| Interpretation           | 20 | Give a cautious overall interpretation of results considering objectives, limitations, multiplicity of analyses, results from similar studies, and other relevant evidence | 17-18 | Cautious overall interpretation of the key findings have been provided.                                                                          |
| Generalisability         | 21 | Discuss the generalisability (external validity) of the study results                                                                                                      | 17-18 |                                                                                                                                                  |
| <b>Other information</b> |    |                                                                                                                                                                            |       |                                                                                                                                                  |
| Funding                  | 22 | Give the source of funding and the role of the funders for the present study and, if applicable, for the original study on which the present article is based              | 19    | The funders had no role in study design, data collection and analysis, decision to publish, or preparation of the manuscript                     |

\*Give information separately for cases and controls in case-control studies and, if applicable, for exposed and unexposed groups in cohort and cross-sectional studies.

**Note:** An Explanation and Elaboration article discusses each checklist item and gives methodological background and published examples of transparent reporting. The STROBE checklist is best used in conjunction with this article (freely available on the Web sites of PLoS Medicine at <http://www.plosmedicine.org/>, Annals of Internal Medicine at <http://www.annals.org/>, and Epidemiology at <http://www.epidem.com/>). Information on the STROBE Initiative is available at [www.strobe-statement.org](http://www.strobe-statement.org).
